# Supplementary material for: An efficient and expeditious Fmoc protection of amines and amino acids in aqueous media
Source: Royal Society of Chemistry journal article supplement (doi:10.1039/c1gc15868f), 2011-01-01
Supplement: c1gc15868f.pdf [file c1gc15868f.pdf]

# An efficient and expeditious Fmoc protection of amines and amino acids in aqueous media

Manoj B. Gawande\* and Paula S. Branco\*

*REQUIMTE, Departamento de Química, Faculdade de Ciências e Tecnologia, FCT, Universidade Nova de Lisboa, Portugal. E-mail: [mbgawande@yahoo.co.in](mailto:mbgawande@yahoo.co.in); [psb@dq.fct.unl.pt](mailto:psb@dq.fct.unl.pt), Fax: +351 21 2948550; Tel: +351 21 2948300*

|                                                                           |           |
|---------------------------------------------------------------------------|-----------|
| <b>General methods and experimental procedures.....</b>                   | <b>2</b>  |
| <b>E-Factor and Mass Intensity calculations.....</b>                      | <b>8</b>  |
| <b>References.....</b>                                                    | <b>13</b> |
| <b>IR, <sup>1</sup>H, <sup>13</sup>C and MS spectra of compounds.....</b> | <b>14</b> |
| <b>HPLC analysis of N-Fmoc α-amino acids 3u and 3v.....</b>               | <b>55</b> |

## General methods and experimental procedures

All commercial reagents were used as received unless otherwise mentioned. For analytical and preparative thin-layer chromatography, Merck, 0.2 mm and 0.5 mm Kieselgel GF 254 percoated were used, respectively. The spots were visualized using UV light. Infrared spectra were recorded on a Perkin Elmer spectrum 1000.  $^1\text{H}$  and  $^{13}\text{C}$  NMR spectra were recorded on a Bruker ARX400 spectrometer at 400 and 100.62, respectively.  $^1\text{H}$  shifts are reported relative to internal TMS. Carbon shifts are given relative to the  $^{13}\text{C}$  signal of  $\text{CDCl}_3$  ( $\delta$  77.0 ppm), DMSO ( $\delta$  39.5 ppm),  $\text{CD}_3\text{CO}$  ( $\delta$  29.8 ppm) and  $\text{CD}_3\text{OD}$  ( $\delta$  49 ppm). Chemical ionization and high resolution mass spectra were recorded at the Mass Spectrometry Unit at the University of Santiago de Compostela, Spain. The electron impact mass spectra were recorded at the Department of Chemistry, FCT, using a Micromas GCT-TOF. High performance liquid chromatography (HPLC) were conducted on a Shimadzu (Japan) system equipped with an LC-20 AT pump, UV-detecter (SPD-M20A), and a Rheodyne 7125injector. The chiral stationary column used was a Chiralpak-IA (250mm X 4 mm). The mobile phase consisted of 10 % isopropyl alcohol : 90 % hexane containing 0.1 % TFA. The flow rate was set at 1 ml/min and the elution of analytes was monitored at 254 nm. *N*-FMOC  $\alpha$ -amino acids were dissolved in isopropanol at a concentration of 0.5mg/ml and injected as a volume of 10 $\mu\text{l}$ .<sup>1</sup> Optical rotations were measured at 22 °C on an AA-1000 polarimeter (0.5 dm cell) at 589 nm. The concentrations (c) are expressed in g/100 mL.

**General procedure for the *N*-Fmoc protection of amines:** To Fmoc chloride (1.2 mmol) was added the amine (1mmol) and water 1.5 mL and the reaction mixture stirred at 60 °C. The reaction was monitored by thin layer chromatography using ethyl acetate and hexane as eluent (3:7). After consumption of the amine the reaction product was filtered, washed with water and recrystallized from hot ethanol to afford the pure product.

### General procedure for the *N*-Fmoc protection of $\alpha$ -amino acids

To the mixture of the two solids, the amino acid (1 mmol) and Fmoc chloride (1.2 mmol) it was added 1.5 mL of water:ethanol (3:1). The reaction mixture was stirred at 60 °C for particular time. After completion of reaction monitored by TLC the solution was acidified with HCl (1M)

untill pH 4-5 at 0 °C and extracted with EtOAc (3 X 10 mL). The combined organic layers were dried (Na<sub>2</sub>SO<sub>4</sub>) and evaporated affording the pure *N*-Fmoc  $\alpha$ -amino acids. Determination of the enantiomeric purity of *N*-FMOC amino acids was accomplished by HPLC analysis as stated above in general methods and experimental procedures.

***N*-(9-Fluorenylmethoxycarbonyl)aniline (3a)<sup>2</sup>**: solid pale brown, obtained in 90% yield. <sup>1</sup>H NMR (400 MHz, CDCl<sub>3</sub>)  $\delta$ : 7.79 (d, 2H, *J*=7.4 Hz), 7.63 (d, 2H, *J*=7.0 Hz), 7.43-7.05 (m, 8H), 6.63(br s, 1H), 4.56 (d, 2H, *J*=6.4 Hz), 4.28 (t, 1H, *J*=6.4 Hz). <sup>13</sup>C NMR (CDCl<sub>3</sub>)  $\delta$ : 47.1, 66.8, 118.81, 120.0, 123.6, 124.9, 127.1, 127.8, 129.1, 137.7, 141.4, 143.8, 153.4. MSEI(+) *m/z*: 315 [M]<sup>+</sup>, 196 [(9H-fluoren-9-yl)methanol]<sup>+</sup>, 178 [9-methyl-9H-fluorene-H]<sup>+</sup>, 165 [9H-fluorene-H]<sup>+</sup>.

***N*-(9-Fluorenylmethoxycarbonyl)-4-methylaniline (3b)**: colorless solid obtained in 83 % yield (mp 195-197°C). IR(KBr)  $\nu_{\max}$ : 3327 (N-H), 1697 (C=O), 1527 (C=C), 1234 (C-O). <sup>1</sup>H NMR (400 MHz, CDCl<sub>3</sub>)  $\delta$ : 7.79 (d, 2H, *J*=7.4 Hz), 7.62 (d, 2H, *J*=6.6 Hz), 7.43-7.31 (m, 6H), 7.11 (d, 2H, *J*=7.7 Hz), 6.59 (br s, 1H), 4.54 (d, 2H, *J*=6.5 Hz), 4.27 (t, 1H, *J*=6.3 Hz). <sup>13</sup>C NMR (CDCl<sub>3</sub>)  $\delta$ : 20.7, 47.2, 66.80, 118.9, 120.0, 125.0, 127.1, 127.8, 129.6, 133.2, 135.1, 141.4, 143.8, 153.5. MSEI(+) *m/z*: 329 [M]<sup>+</sup>, 196 [(9H-fluoren-9-yl)methanol]<sup>+</sup>, 178 [9-methyl-9H-fluorene-H]<sup>+</sup>, 165 [9H-fluorene-H]<sup>+</sup>. HRMSEI calcd for C<sub>22</sub>H<sub>20</sub>NO<sub>2</sub> [MH]<sup>+</sup> 330.1494 obtained 330.1494.

***N*-(9-Fluorenylmethoxycarbonyl)-3-hydroxyaniline (3c)<sup>3</sup>**: Colorless solid obtained in 81 % yield. <sup>1</sup>H NMR (400 MHz, CDCl<sub>3</sub>/(CD<sub>3</sub>)<sub>2</sub>CO)  $\delta$ : 7.98 (bs, 1H), 7.80 (s, 1H), 7.48 (d, 2H, *J*=7.1 Hz), 7.36 (d, 2H, *J*=6.9 Hz), 7.26 – 6.78 (m, 6H), 6.69 (s, 1H), 6.26 (d, *J*=6.8 Hz), 4.16 (d, 2H, *J*=6.5 Hz), 3.98 (t, 1H, *J*=6.0 Hz); <sup>13</sup>C NMR (CDCl<sub>3</sub>/(CD<sub>3</sub>)<sub>2</sub>CO)  $\delta$ : 46.5, 65.9, 105.4, 109.6, 119.3, 124.5, 126.5, 127.1, 129.0, 139.3, 140.7, 143.4, 153.0, 157.0. MSEI(+) *m/z*: 331 [M]<sup>+</sup>, 196 [(9H-fluoren-9-yl)methanol]<sup>+</sup>, 178 [9-methyl-9H-fluorene-H]<sup>+</sup>, 165 [9H-fluorene-H]<sup>+</sup>.

***N*-(9-Fluorenylmethoxycarbonyl)-3-chloroaniline (3d)**: Colorless solid obtained in 87 % yield (mp 163-165°C). IR(KBr)  $\nu_{\max}$ : 3307 (N-H), 1699 (C=O), 1520 (C=C), 1233 (C-O). <sup>1</sup>H NMR (400 MHz, CDCl<sub>3</sub>)  $\delta$ : 7.79 (d, 2H, *J*=7.3 Hz), 7.61 (d, 2H, *J*=7.1 Hz), 7.49-7.03 (m, 8H), 6.65 (br s, 1H), 4.57 (d, 2H, *J*=6.2 Hz), 4.28 (t, 1H, *J*=6.0 Hz). <sup>13</sup>C NMR (CDCl<sub>3</sub>)  $\delta$ : 47.0, 67.0, 116.7, 118.8, 120.1, 123.6, 124.9, 127.2, 127.8, 130.0, 134.8, 138.9, 141.4, 143.6, 153.1. MSEI(+) *m/z*: 349 [M]<sup>+</sup>, 178 [9-methyl-9H-fluorene-H]<sup>+</sup>, 152.9 [C<sub>7</sub>H<sub>4</sub>ClNO]<sup>+</sup>, 126 [C<sub>7</sub>H<sub>4</sub>ClNH]<sup>+</sup>. HRMSCI calcd for C<sub>21</sub>H<sub>16</sub>ClNO<sub>2</sub> [M]<sup>+</sup> 349.0870 obtained 349.0863.

***N*-(9-Fluorenylmethoxycarbonyl)-4-bromoaniline (3e):** Colorless solid obtained in 80 % yield (mp 203-205°C). IR(KBr)  $\nu_{\max}$ : 3333 (N-H), 1702 (C=O), 1530 (C=C), 1231 (C-O).  $^1\text{H}$  NMR (400 MHz,  $\text{CDCl}_3$ )  $\delta$ : 7.79 (d, 2H,  $J=7.5$  Hz), 7.61 (d, 2H,  $J=7.3$  Hz), 7.43-7.38 (m, 6H), 7.33 (t, 2H,  $J=7.4$  Hz), 7.26 (m, 2H), 6.62 (br s, 1H), 4.57 (d, 2H,  $J=6.3$  Hz), 4.26 (t, 1H,  $J=6.4$  Hz).  $^{13}\text{C}$  NMR ( $\text{CDCl}_3$ )  $\delta$ : 47.1, 66.9, 116.1, 120.1, 120.3, 124.9, 124.9, 127.1, 127.8, 132.0, 136.7, 141.4, 143.6, 153.2. MSCI(+)  $m/z$ : 394  $[\text{MH}]^+$ , 197  $[\text{C}_7\text{H}_4\text{BrNO}]^+$ , 179  $[\text{9-methyl-9H-fluorene}]^+$ , 165  $[\text{9H-fluorene}]^+$ . HRMSCI calcd for  $\text{C}_{21}\text{H}_{16}\text{BrNO}_2$   $[\text{M}]^+$  393.0364 obtained 393.0355.

***N*-(9-Fluorenylmethoxycarbonyl)-4-fluoroaniline (3f):** Colorless solid obtained in 84 % yield (mp 172-174°C). IR(KBr)  $\nu_{\max}$ : 3338 (N-H), 1699 (C=O), 1528 (C=C), 1220 (C-O).  $^1\text{H}$  NMR (400 MHz,  $\text{CDCl}_3$ )  $\delta$ : 7.78 (d, 2 H,  $J=7.6$  Hz), 7.61 (d, 2H,  $J=7.1$  Hz), 7.43 (d, 1H,  $J=7.4$  Hz), 7.41 (d, 1H,  $J=7.5$  Hz), 7.33 (t, 4H,  $J=7.3$  Hz), 7.00 (d, 1H,  $J=8.4$  Hz), 6.98 (d, 1H,  $J=8.5$  Hz), 6.62 (br s, 1H), 4.56 (d, 2H,  $J=6.4$  Hz), 4.28 (t, 1H,  $J=6.4$  Hz).  $^{13}\text{C}$  NMR ( $\text{CDCl}_3$ )  $\delta$ : 47.1, 66.9, 115.6, 115.8, 120.1, 120.6, 124.9, 127.1, 127.8, 128.2, 133.6, 141.4, 143.7, 153.6, 160.3. MSCI(+)  $m/z$ : 333  $[\text{M}]^+$ , 314  $[\text{M-F}]^+$ , 179  $[\text{9-methyl-9H-fluoreneH}]^+$ , 138  $[\text{C}_7\text{H}_4\text{FNO}]^+$ . HRMSCI calcd for  $\text{C}_{21}\text{H}_{16}\text{FNO}_2$   $[\text{M}]^+$  333.1165 obtained 313.1154.

***N*-(9-Fluorenylmethoxycarbonyl)benzylamine<sup>4</sup> (3g):** Colorless solid obtained in 88 % yield.  $^1\text{H}$  NMR (400 MHz,  $\text{CDCl}_3$ )  $\delta$ : 7.76 (d, 2H,  $J=6.8$  Hz), 7.59 (d, 2H,  $J=6.0$  Hz), 7.40-7.28 (m, 9H), 5.06 (br s, 1H), 4.47 (d, 2H,  $J=5.6$  Hz), 4.40 (m s, 2H), 4.24 (m s, 2H).  $^{13}\text{C}$  NMR ( $\text{CDCl}_3$ )  $\delta$ : 45.0, 47.3, 66.6, 119.9, 125.0, 127.0, 127.5, 127.6, 128.6, 138.4, 141.3, 143, 156.7.

***N*-(9-Fluorenylmethoxycarbonyl)-4-methylbenzylamine (3h):** Colorless solid obtained in 87 % yield (mp 151-153°C).  $^1\text{H}$  NMR (400 MHz,  $\text{CDCl}_3$ )  $\delta$ : 7.78 (d, 2H,  $J=6.8$  Hz), 7.61 (d, 2H,  $J=6.2$  Hz), 7.41-7.16 (m, 8H), 5.09 (br s, 1H), 4.47 (d, 2H,  $J=6$  Hz), 4.35 (d, 2H,  $J=3.9$  Hz), 4.24 (d, 2H,  $J=5.9$  Hz).  $^{13}\text{C}$  NMR ( $\text{CDCl}_3$ )  $\delta$ : 21.0, 44.8, 47.3, 66.6, 119.9, 124.9, 126.9, 127.5, 127.6, 129.3, 135.3, 137.1, 141.3, 143.9, 156.3. MSCI(+)  $m/z$ : 344  $[\text{MH}]^+$ , 179  $[\text{9-methyl-9H-fluoreneH}]^+$ , 105  $[\text{C}_8\text{H}_9]^+$ . HRMSCI calcd for  $\text{C}_{23}\text{H}_{21}\text{NO}_2$   $[\text{M}]^+$  344.1651 obtained 344.1641.

***N*-(9-Fluorenylmethoxycarbonyl)-4-methoxybenzylamine (3i)<sup>5</sup>:** Colorless solid obtained in 80 % yield.  $^1\text{H}$  NMR (400 MHz,  $\text{CDCl}_3$ )  $\delta$ : 7.77 (d, 2H,  $J=7.0$  Hz), 7.59 (d, 2H,  $J=5.8$  Hz), 7.51-7.19 (m, 6H), 6.87 (d, 2H,  $J=6.9$  Hz), 4.45 (d, 2H,  $J=5.5$  Hz), 4.45-4.22 (m, 5 H) 3.80 (s, 3H).  $^{13}\text{C}$  NMR ( $\text{CDCl}_3$ )  $\delta$ : 44.6, 47.3, 55.3, 66.6, 114.1, 120.0, 125.0, 127.0, 127.7, 128.9, 130.5,

141.3, 143.9, 156.3, 159.1. MSEI(+)  $m/z$ : 359  $[M]^+$ , 196 [(9H-fluoren-9-yl)methanol] $^+$ , 178 [9-methyl-9H-fluorene-H] $^+$ , 165 [9H-fluorene-H] $^+$ .

***N*-(9-Fluorenylmethoxycarbonyl)morpholine (3j)**: Colorless solid obtained in 80 % yield (mp 113-115°C).  $^1\text{H}$  NMR (400 MHz,  $\text{CDCl}_3$ )  $\delta$ : 7.78 (d, 2H,  $J=7.6$  Hz), 7.57 (d, 2H,  $J=7.4$  Hz), 7.41 (t, 2H,  $J=7.4$  Hz), 7.32 (t, 2H,  $J=7.4$  Hz), 4.48 (d, 2H,  $J=6.6$  Hz), 4.24 (t, 1H,  $J=6.6$  Hz), 3.62 (m, 4H), 3.45 (m, 4H).  $^{13}\text{C}$  NMR ( $\text{CDCl}_3$ )  $\delta$ : 44.0, 44.2, 47.4, 66.5, 67.3, 120.0, 124.98, 127.1, 127.7, 141.4, 143.9, 155.2. MSCI(+)  $m/z$ : 310  $[MH]^+$ , 178 [9-methyl-9H-fluorene-H] $^+$ , 165 [9H-fluorene-H] $^+$ . HRMSCI calcd for  $\text{C}_{19}\text{H}_{20}\text{NO}_3$   $[M]^+$  310,1443 obtained 310,1449.

***N*-(9-Fluorenylmethoxycarbonyl)pyrrolidine (3k)**<sup>6</sup>: Pale yellow solid obtained in 82 % yield.  $^1\text{H}$  NMR (400 MHz,  $\text{CDCl}_3$ )  $\delta$ : 7.78(d, 2H,  $J=7.5$  Hz), 7.64 (d, 2H,  $J=7.4$  Hz), 7.41 (t, 2H,  $J=7.4$  Hz), 7.32 (t, 2H,  $J=7.4$  Hz), 4.40 (d, 2H,  $J=7.2$  Hz), 4.26 (t, 1H,  $J=7.1$  Hz), 3.45 (t, 4 H,  $J=6.7$  Hz), 1.93-1.86 (m, 8H).  $^{13}\text{C}$  NMR ( $\text{CDCl}_3$ )  $\delta$ : 24.3, 25.6, 44.8, 47.4, 67.0, 119.9, 125.1, 126.9, 127.6, 141.3, 144.2, 155.2.

***N*-(9-Fluorenylmethoxycarbonyl)piperidine (3l)**<sup>7</sup>: Pale yellow solid obtained in 84 % yield.  $^1\text{H}$  NMR (400 MHz,  $\text{CDCl}_3$ )  $\delta$ : 7.78 (d, 2H,  $J=7.5$  Hz), 7.60 (d, 2H,  $J=7.4$  Hz), 7.38 (t, 2H,  $J=7.3$  Hz), 7.30 (t, 2H,  $J=7.1$  Hz), 4.41 (d, 2H,  $J=7.0$  Hz), 4.27 (t, 1H,  $J=6.9$  Hz), 3.46 (t, 4 H,  $J=5.5$  Hz), 1.66-1.54 (m, 6 H).  $^{13}\text{C}$  NMR ( $\text{CDCl}_3$ )  $\delta$ : 24.3, 24.6, 44.8, 47.4, 67.1, 119.9, 125.00, 127.0, 127.6, 141.3, 144.2, 155.2.

***N*-(9-Fluorenylmethoxycarbonyl)-prop-2-yn-1-amine (3m)**: Colorless solid obtained in 80 % yield (mp 122-124°C).  $^1\text{H}$  NMR (400 MHz,  $\text{CD}_3\text{OD}$ )  $\delta$ : 7.79 (d, 2H,  $J=7.3$  Hz), 7.63 (d, 2H,  $J=7.1$  Hz), 7.38 (t, 2H,  $J=7.3$  Hz), 7.30 (t, 2H,  $J=7.1$  Hz), 4.34 (d, 2H,  $J=6.8$  Hz), 4.21 (m, 1H), 3.87 (s, 2H), 2.56 (s, 1H).  $^{13}\text{C}$  NMR ( $\text{CD}_3\text{OD}$ )  $\delta$ : 31.0, 48.0, 68.0, 72.0, 81.2, 120.8, 126.1, 128.1, 128.7, 142.5, 145.2, 158.5. MSEI(+)  $m/z$ : 278  $[MH]^+$ , 196 [(9H-fluoren-9-yl)methanol] $^+$ , 178 [9-methyl-9H-fluorene-H] $^+$ , 165 [9H-fluorene-H] $^+$ . HRMSCI calcd for  $\text{C}_{18}\text{H}_{16}\text{NO}_2$   $[M]^+$  278,1181 obtained 278,1172.

***N*-(9-Fluorenylmethoxycarbonyl)cyclohexylamine (3n)**<sup>7, 8</sup>: Colorless solid obtained in 80 % yield.  $^1\text{H}$  NMR (400 MHz,  $\text{CDCl}_3$ )  $\delta$ : 7.67 (d, 2H,  $J=7.2$  Hz), 7.51 (d, 2H,  $J=7.1$  Hz), 7.31 (t, 2H,  $J=7.1$  Hz), 7.22 (t, 2H,  $J=7.1$  Hz), 5.03 (br s, 1H), 4.29 (d, 2H,  $J=5.2$  Hz), 4.13 (m, 1H), 3.91 (d, 1H,  $J=5$  Hz), 2.15-2.05 (m, 2H), 1.88 (m, 2H), 1.59-1.51 (m, 4 H), 1.35 (m, 2H).  $^{13}\text{C}$  NMR ( $\text{CDCl}_3$ )  $\delta$ : 23.2, 32.7, 47.0, 52.5, 66.0, 119.6, 124.8, 126.7, 127.3, 141.0, 143.8, 155.7.

***N*-(9-Fluorenylmethoxycarbonyl)octylamine (3o)**: Pale yellow solid obtained in 82% yield (mp 91-93°C). <sup>1</sup>H NMR (400 MHz, CDCl<sub>3</sub>) δ: 7.78(d, 2H, *J*=7.2 Hz), 7.61 (d, 2H, *J*=7.5 Hz), 7.42-7.30 (m, 4 H), 4.75 (br s, 1H), 4.41 (d, 2H, *J*=5.0 Hz), 4.26-4.23 (m, 1H), 3.20 (m, 2H), 1.66-1.29 (m, 12H), 0.89 (t, 3H, *J*=6.4 Hz). <sup>13</sup>C NMR (CDCl<sub>3</sub>) δ: 14.1 14.3, 22.6, 26.7, 29.2, 29.9, 31.8, 41.1, 46.8, 47.3, 66.4, 119.9, 124.9, 127.0, 127.6, 141.3, 144.0, 144.3, 156.4. MSEI(+) *m/z*: 352 [MH]<sup>+</sup>, 196 [(9H-fluoren-9-yl)methanol]<sup>+</sup>, 178 [9-methyl-9H-fluorene-H]<sup>+</sup>, 165 [9H-fluorene-H]<sup>+</sup>. HRMSCI calcd for C<sub>23</sub>H<sub>30</sub>NO<sub>2</sub> [MH]<sup>+</sup> 352,2271 obtained 352,2293.

***N*-(9-Fluorenylmethoxycarbonyl)ethanolamine (3p)<sup>9</sup>**: Colorless solid obtained in 92% yield. <sup>1</sup>H NMR (400 MHz, CDCl<sub>3</sub>) δ: 7.77 (d, 2H, *J*=7.5 Hz), 7.60 (d, 2H, *J*=7.7 Hz), 7.40 (t, 2H, *J*=7.3 Hz), 7.31 (dt, 2H, *J*=1 and 7.4 Hz), 5.17 (br s, 1H), 4.44 (d, 2H, *J*=6.7 Hz), 4.23 (t, 1H, *J*=6.6 Hz), 3.71 (d, 2H, *J*=4.4 Hz), 3.71 (d, 2H, *J*=4.5 Hz), 2.13 (br s, 1H). <sup>13</sup>C NMR (CDCl<sub>3</sub>) δ: 43.5, 47.2, 62.3, 66.8, 112.0, 125.0, 127.0, 127.7, 141.3, 143.9, 157.1.

***N*-(9-Fluorenylmethoxycarbonyl)ethylamine (3q)<sup>6</sup>**: Colorless solid obtained in 87 % yield. <sup>1</sup>H NMR (400 MHz, CDCl<sub>3</sub>) δ: 7.77 (d, 2H, *J*=7.5 Hz), 7.60 (d, 2H, *J*=7.4 Hz), 7.40 (t, 2H, *J*=7.4 Hz), 7.31 (t, 2H, *J*=7.4 Hz), 4.73(br s, 1H), 4.41 (d, 2H, *J*=6.3 Hz), 4.22 (t, 1H, *J*=7.0 Hz). <sup>13</sup>C NMR (CDCl<sub>3</sub>) δ: 15.3, 35.9, 47.3, 66.5, 119.9, 125.0, 127.0, 127.6, 141.3, 144.3, 144.0, 156.3.

**(R)-*N*-(9-Fluorenylmethoxycarbonyl)-1-phenylethanamine (3r)<sup>10</sup>**: Colorless solid obtained in 87 % yield. <sup>1</sup>H NMR (400 MHz, CDCl<sub>3</sub>) δ: 7.77 (d, 2H, *J*=7.4 Hz), 7.59 (d, 2H, *J*=6.2 Hz), 7.41-7.26 (m, 9H), 5.02 (s, 2H) 4.86 (s, 2H), 4.42 (d, 2H, *J*=6.8 Hz), 4.20 (s, 3H), 1.59-1.49 (m, 4H). <sup>13</sup>C NMR (CDCl<sub>3</sub>) δ: 22.4, 47.3, 50.7, 66.5, 119.9, 125.0, 125.9, 127.0, 127.4, 127.6, 128.7, 141.3, 143.42, 144.0, 155.6.

***N*-(9-Fluorenylmethoxycarbonyl)dopamine (3s)<sup>11</sup>**: Pale yellow solid obtained in 75 % yield. <sup>1</sup>H NMR (400 MHz, CDCl<sub>3</sub>) δ: 7.77(d, 2H, *J*=7.5 Hz), 7.56 (d, 2H, *J*=7.2 Hz), 7.39 (t, 2H, *J*=7.4 Hz), 7.31 (t, 2H, *J*=7.4 Hz), 6.79 (d, 1H, *J*=7.5 Hz), 6.68 (s, 1H), 6.58 (d, 1H, *J*=7.1 Hz), 5.63 (br s, 2H), 4.79 (br s, 1H), 4.40 (d, 2H, *J*=6.5 Hz), 4.21 (t, 1H, *J*=6.4 Hz), 3.39 (m, 2H), 2.68 (m, 2H). <sup>13</sup>C NMR (CDCl<sub>3</sub>) δ: 35.4, 42.3, 47.3, 66.6, 115.5, 115.7, 120.0, 121.1, 125.0, 127.1, 127.7, 131.4, 141.3, 142.0, 143.0, 143.9, 156.5.

***N*-(9-Fluorenylmethoxycarbonyl)glycine (3t)<sup>8, 12</sup>**: Colorless solid obtained in 89 % yield. <sup>1</sup>H NMR (400 MHz, CD<sub>3</sub>)<sub>2</sub>SO) δ: 7.88 (d, 2H, *J*=7.4 Hz), 7.70 (d, 2H, *J*=7.3 Hz), 7.61 (1H, t, *J*=5.6

Hz), 7.41 (t, 2H,  $J=7.3$  Hz), 7.32 (t, 2H,  $J=7.2$  Hz), 4.29 - 4.21 (m, 3H), 3.65 (d, 2H,  $J=5.6$  Hz).  
 $^{13}\text{C}$  NMR ( $\text{CD}_3)_2\text{SO}$ )  $\delta$ : 42.1, 46.6, 66.3, 120.1, 125.2, 127.1, 127.6, 140.7, 143.8, 156.5, 171.6.

***N*-(9-Fluorenylmethoxycarbonyl)alanine (3u)**<sup>13</sup>: Colorless solid obtained in 86 % yield.  $[\alpha]_{\text{D}}^{22} = -19^\circ$  (c 1.5, DMF) (Lit<sup>14</sup>  $-19^\circ$ ).  $^1\text{H}$  NMR (400 MHz,  $(\text{CD}_3)_2\text{SO}$ )  $\delta$ : 7.87 (d, 2H,  $J=7.5$  Hz), 7.72-7.70 (m, 2H), 7.65 (d, 1H,  $J=7.6$  Hz), 7.41 (t, 2H,  $J=7.4$  Hz), 7.32 (t, 2H,  $J=7.4$  Hz), 4.31-4.19 (m, 3H), 4.00 (q, 1H,  $J=7.4$  Hz), 1.28 (d, 2H,  $J=7.3$  Hz).  $^{13}\text{C}$  NMR ( $\text{CD}_3)_2\text{SO}$ )  $\delta$ : 17.1, 46.7, 49.3, 65.6, 120.2, 125.3, 127.1, 127.7, 140.8, 143.9, 155.9, 174.5.

***N*-(9-Fluorenylmethoxycarbonyl)proline (3v)**<sup>12, 15</sup>: Colorless solid obtained in 89 % yield.  $[\alpha]_{\text{D}}^{22} = -30^\circ$  (c 1.0, DMF) (Lit<sup>14</sup>  $-32^\circ$ ).  $^1\text{H}$  NMR (400 MHz,  $\text{CDCl}_3$ )  $\delta$ : 7.76 (d, 2H,  $J=7.5$  Hz), 7.70 (d, 2H,  $J=7.4$  Hz), 7.59-7.52 (m, 2H), 7.40-7.27 (m, 4H), 5.1 (br, 1H), 4.44-4.09 (m, 4H), 3.57-3.42 (m, 2H), 2.21-1.93 (m, 4H).  $^{13}\text{C}$  NMR ( $\text{CDCl}_3$ )  $\delta$ : 23.3, 24.4, 29.1, 31.0, 46.7, 46.9, 47.2, 67.4, 67.9, 120.0, 125.0, 127.1, 127.6, 127.7, 141.3, 143.7, 143.8, 154.5, 156.1, 175.5.

## E-Factor and Mass Intensity calculations

### Green concept: Comparisons of *N*-(9-fluorenylmethoxycarbonyl)aniline synthesis with reported methods

A) Calculation for the synthesis of *N*-(9-fluorenylmethoxycarbonyl)aniline in toluene.<sup>16</sup>

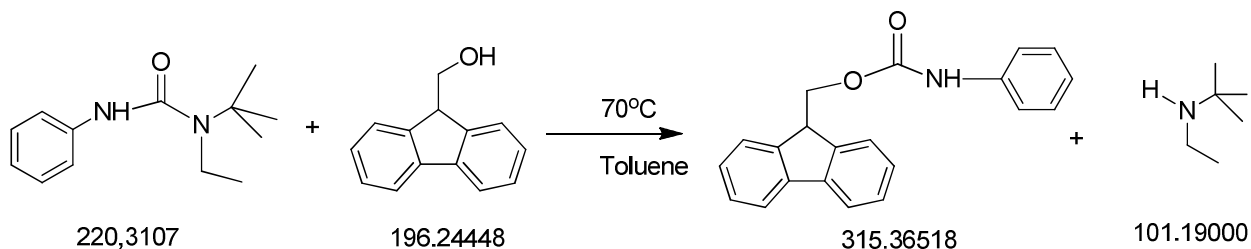

| Raw Materials Used                         |                   | Crude product and Waste        |         |
|--------------------------------------------|-------------------|--------------------------------|---------|
| 1- <i>tert</i> -butyl-1-ethyl-3-phenylurea | 1 g               | Crude product                  | 1.125 g |
| Nucleophile                                | 1.78 g            | Organic solvent waste          | 16.14 g |
| Toluene                                    | 14 mL ( 16.14 g ) | N-ethyl-2-methylpropan-2-amine | 0.36 g  |
| Total                                      | 18.92 g           | Total                          | 17.62   |

E-Factor (E) = (16.14 g of waste produced / 1.125 g of crude product) = 14.34

Mass Intensity = (18.92 g of raw material used / 1.125 g of crude product) = 16.81

#### Considerations:

1. Calculation did not consider for solvent used for column chromatography.
2. Side product excluded from calculations



B) Calculation for the synthesis of *N*-(9-fluorenylmethoxycarbonyl)aniline in dichloromethane.<sup>10</sup>

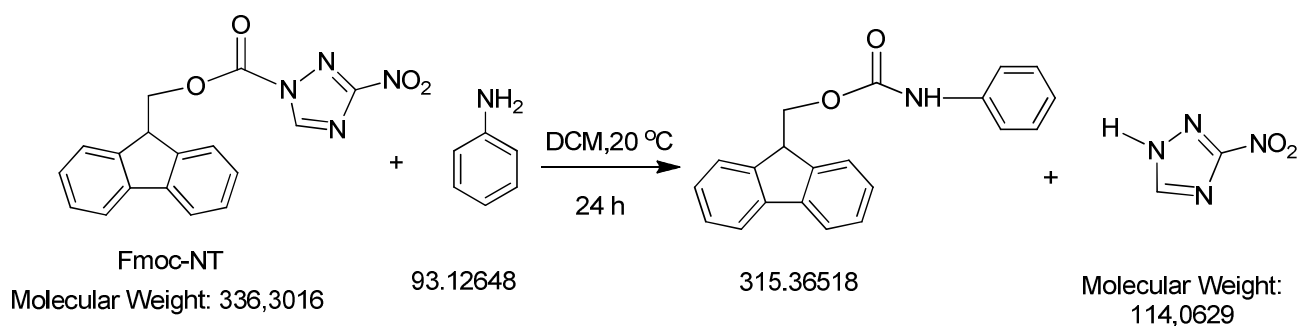

| Raw Materials Used     |                   | Crude product and Waste |           |
|------------------------|-------------------|-------------------------|-----------|
| Aniline                | 1 g               | Crude product           | 2.14 g    |
| Fmoc-NT                | 7.72 g            | Side product            | 0.77 g    |
| DCM                    | 45.11 g (60 mL)   | Aqueous waste           | 1097 g    |
| 5 % NaHCO <sub>3</sub> | 1097 g            | Organic solvent waste   | 31.95 g   |
| DCM                    | 274.43 g (365 mL) |                         |           |
| Total                  | 1425.26 g         | Total                   | 1131.86 g |

E-Factor (E) = (1128.95 g of waste produced / 2.14 g of crude product) = 527.54

Mass Intensity = (1425.26 g of raw material used / 2.14 g of crude product) = 666.00

Considerations:

1. 90 % organic solvent recovered
2. Calculation did not consider for organic solvents use for column chromatography

Side product excluded of products' waste

C ) Calculation for the synthesis of *N*-(9-fluorenylmethoxycarbonyl)aniline in benzene.<sup>8</sup>

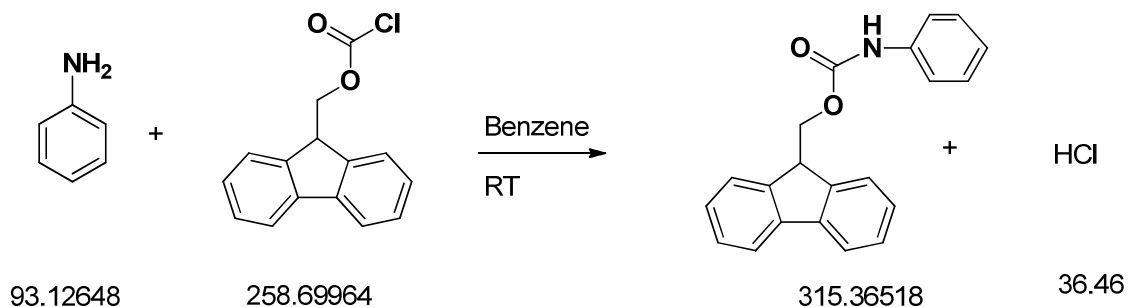

| Raw Materials Used |                  | Crude product and Waste |                 |
|--------------------|------------------|-------------------------|-----------------|
| Aniline            | 1 g              | Crude product           | 3.18 g          |
| Fmoc chloride      | 1.96 g           | Organic waste           | 1.11 g          |
| Benzene            | 10 mL ( 11.18 g) | Aqueous waste + HCl     | 0.49 g + 0.36 g |
| Water              | 0.49 g (0.49 mL) |                         |                 |
| Total              | 14.63 g          | Total                   | 5.14 g          |

E-Factor (E) = (1.6 g of waste produced / 3.18 g of crude product) = 0.50

Mass Intensity = (14.63 g of raw material used / 3.18 g of crude product) = 4.60

Consideration:

1. Calculation did not consider solvent for crystallization
2. 90 % solvent recovered

D) Calculation for the synthesis of *N*-(9-fluorenylmethoxycarbonyl)aniline.<sup>2</sup>

Step I

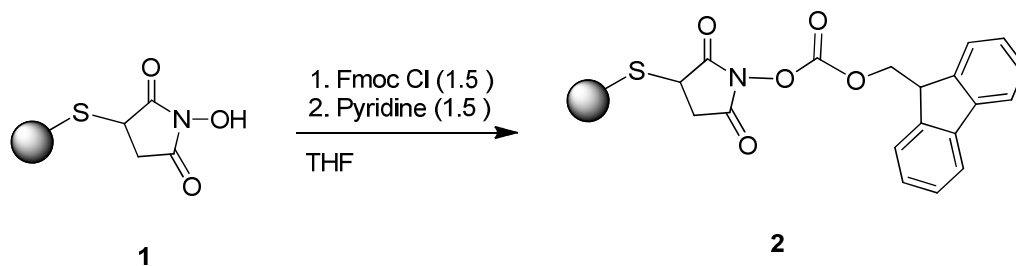

Step II

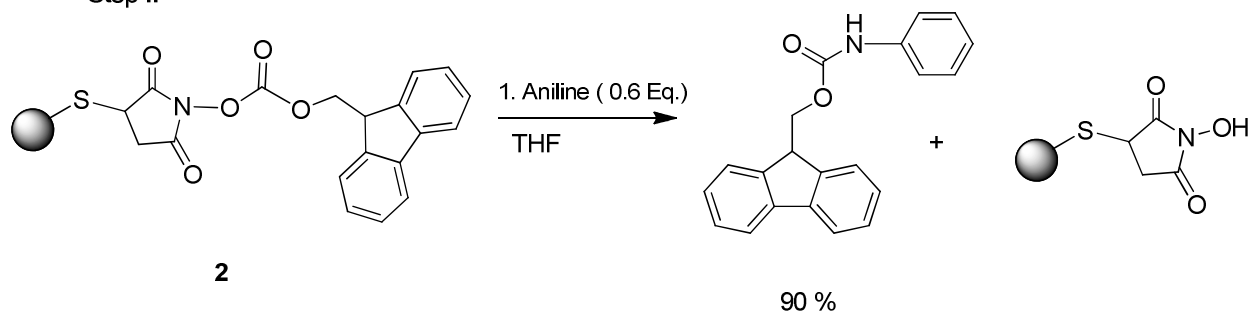

| Raw Materials Used |                   | Crude product and Waste |          |
|--------------------|-------------------|-------------------------|----------|
| Aniline            | 1 g               | Crude product           | 2.83 g   |
| Compound 2         | 22.40 g           | Organic waste           | 40.2 g   |
| THF                | 402.69 g (358 mL) | Resin-NHS recovered     | 21.75 gm |
| Total              | 426.09 g          | Total                   | g        |

E-Factor (E) = (40.2 g of waste produced / 2.83 g of crude product) = 14.20

Mass Intensity = (426.09 g of raw material used / 2.83 g of crude product) = 150.56

Considerations:

1. 90 % solvent recovered
2. Reagents and solvent used for the preparation of compound 2 did not consider in calculations.
3. THF used for resin washing was not consider in calculations

E) Calculation for the synthesis of *N*-(9-fluorenylmethoxycarbonyl)aniline under catalyst-free conditions in aqueous media (the reported procedure)

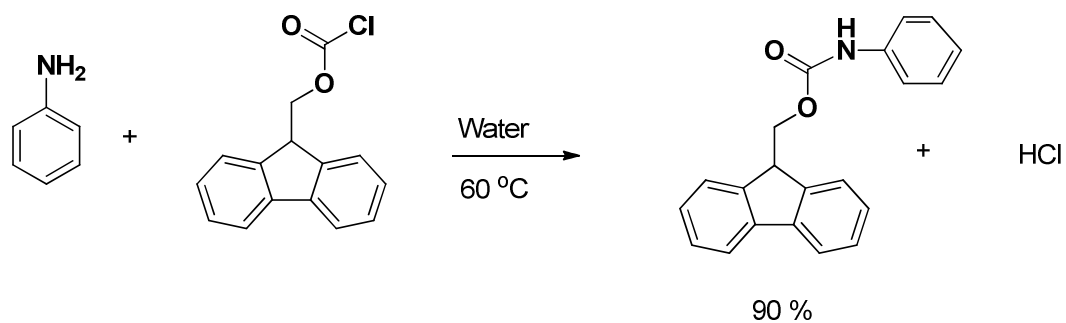

| Raw Materials Used |               | Crude product and Waste |         |
|--------------------|---------------|-------------------------|---------|
| Aniline            | 1 g           | Crude product           | 3.04 g  |
| Fmoc chloride      | 3.33 g        | Aqueous waste + HCl     | 15.36 g |
| Water              | 15 mL ( 15 g) |                         |         |
| Total              | 19.33 g       | Total                   | 18.40 g |

E-Factor (E) = (15.36 g of waste produced / 3.04 g of crude product) = 5.05

Mass Intensity = (19.33 g of raw material used / 3.04 g of crude product) = 6.35

Considerations:

1. Calculation did not consider for ethanol used in crystallization

## References

1. Y. H. Li, C. S. Baek, B. W. Jo and W. Lee, *Bulletin of the Korean Chemical Society*, 2005, **26**, 998.
2. H. Sumiyoshi, T. Shimizu, M. Katoh, Y. Baba and M. Sodeoka, *Org. Lett.*, 2002, **4**, 3923.
3. L. S. Richter and S. Andersen, *Tetrahedron Lett.*, 1998, **39**, 8747.
4. K. G. Dendrinis and A. G. Kalivretenos, *J. Chem. Soc.-Perkin Trans. 1*, 1998, 1463.
5. K. D. Stigers, M. R. Koutroulis, D. M. Chung and J. S. Nowick, *J. Org. Chem.*, 2000, **65**, 3858.
6. J. Collin, J. L. Namy, G. Jones and H. B. Kagan, *Tetrahedron Lett.*, 1992, **33**, 2973.
7. C. Helgen and C. G. Bochet, *J. Org. Chem.*, 2003, **68**, 2483.
8. L. A. Carpino and G. Y. Han, *J. Org. Chem.*, 1972, **37**, 3404.
9. A. Porcheddu, G. Giacomelli, I. Piredda, M. Carta and G. Nieddu, *European Journal of Organic Chemistry*, 2008, 5786.
10. M. Shimizu and M. Sodeoka, *Org. Lett.*, 2007, **9**, 5231.
11. A. Mastrolorenzo, A. Scozzafava and C. T. Supuran, *Eur. J. Pharm. Sci.*, 2000, **11**, 325.
12. R. Chinchilla, D. J. Dodsworth, C. Najera and J. M. Soriano, *Tetrahedron Lett.*, 2001, **42**, 7579.
13. J. Marecek, B. Song, S. Brewer, J. Belyea, R. B. Dyer and D. P. Raleigh, *Org. Lett.*, 2007, **9**, 4935; K. C. Nicolaou, A. A. Estrada, M. Zak, S. H. Lee and B. S. Safina, *Angew. Chem.-Int. Edit.*, 2005, **44**, 1378.
14. S. Nowshuddin, M. N. A. Rao and A. R. Reddy, *Synthetic Communications*, 2009, **39**, 2022.
15. I. Azuse, M. Tamura, K. Kinomura, H. Okai, K. Kouge, F. Hamatsu and T. Koizumi, *Bull. Chem. Soc. Jpn.*, 1989, **62**, 3103.
16. M. Hutchby, C. E. Houlden, J. G. Ford, S. N. G. Tyler, M. R. Gagne, G. C. Lloyd-Jones and K. I. Booker-Milburn, *Angew. Chem.-Int. Edit.*, 2009, **48**, 8721.

### IR, <sup>1</sup>H, <sup>13</sup>C and MS spectra of compounds

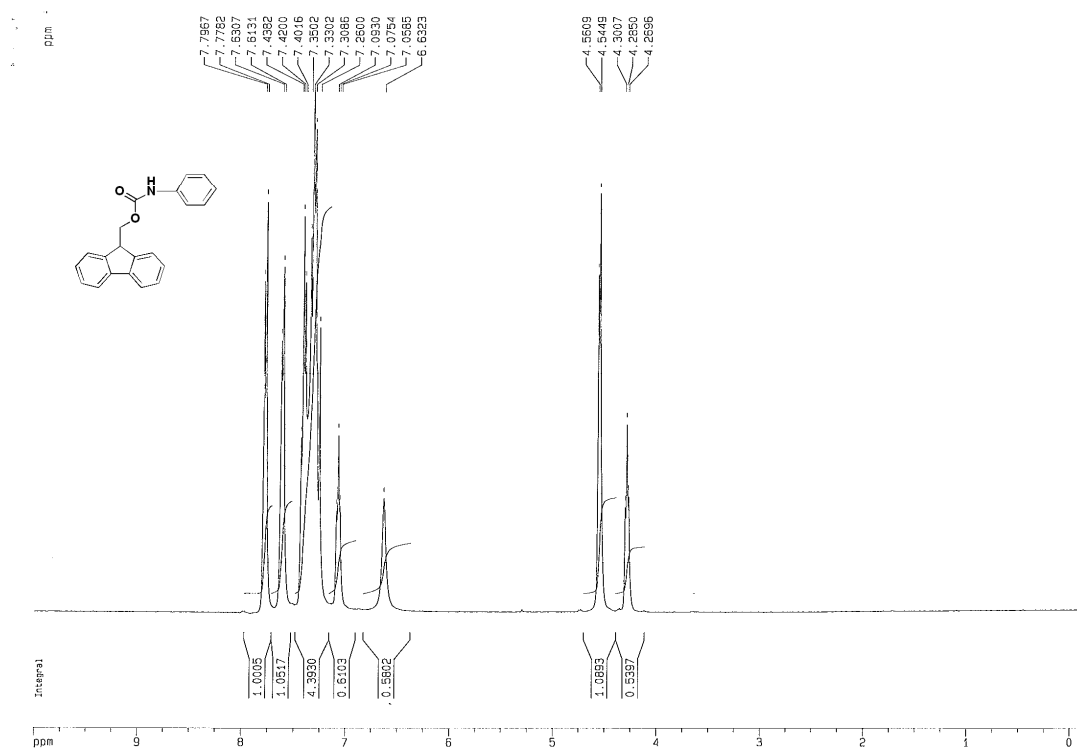

Proton NMR spectra of *N*-(9-fluorenylmethoxycarbonyl)aniline (**3a**).

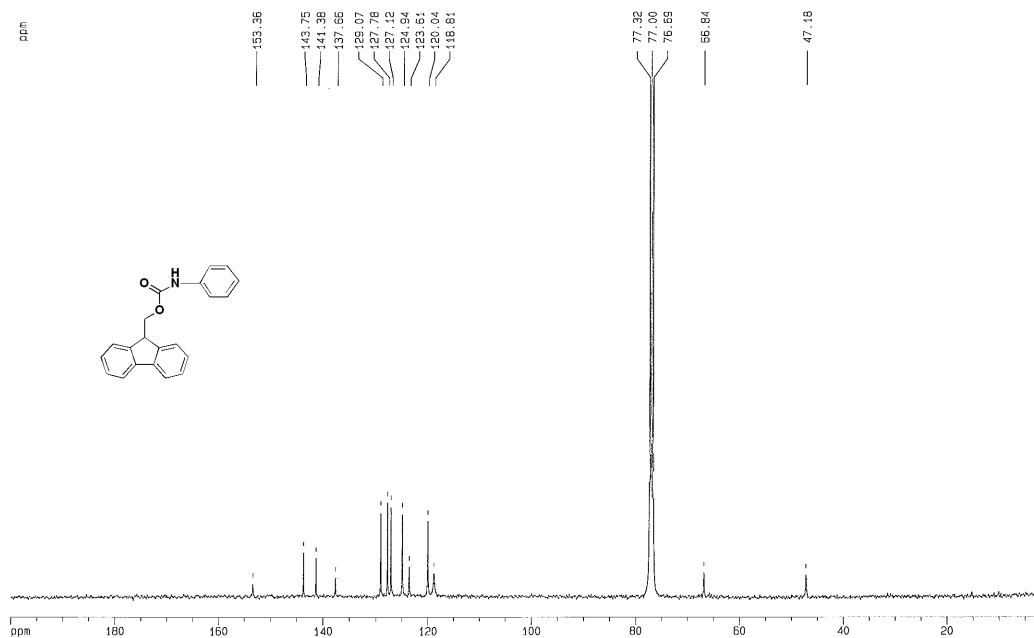

Carbon NMR spectra of *N*-(9-fluorenylmethoxycarbonyl)aniline (**3a**).

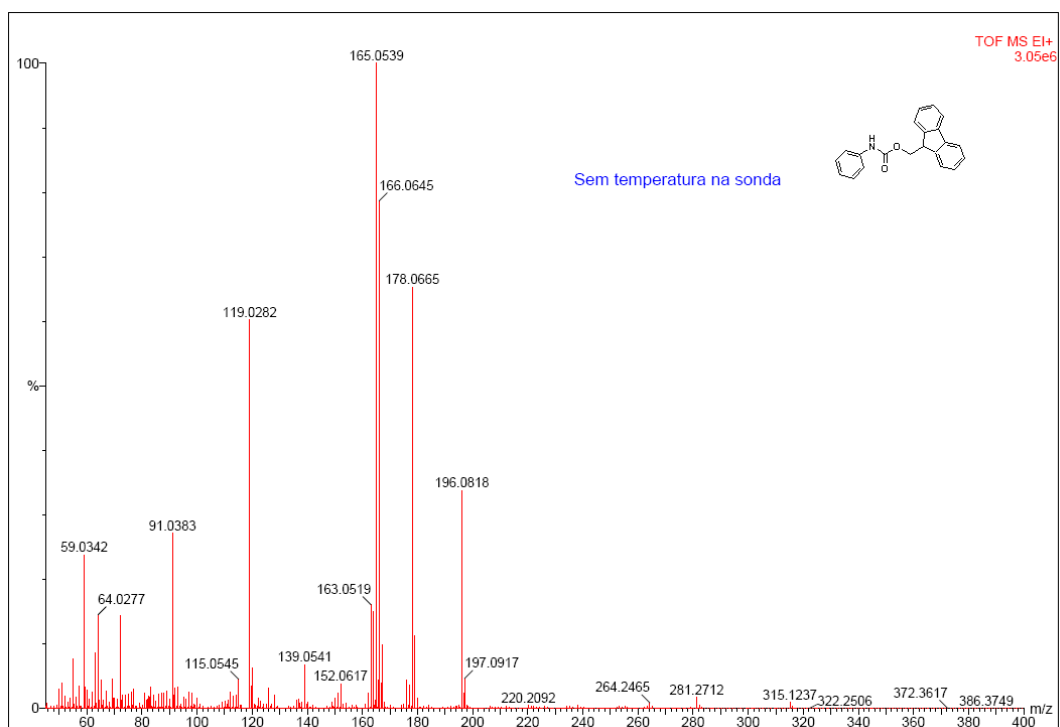

Electron impact mass spectra of *N*-(9-fluorenylmethoxycarbonyl)aniline (**3a**).

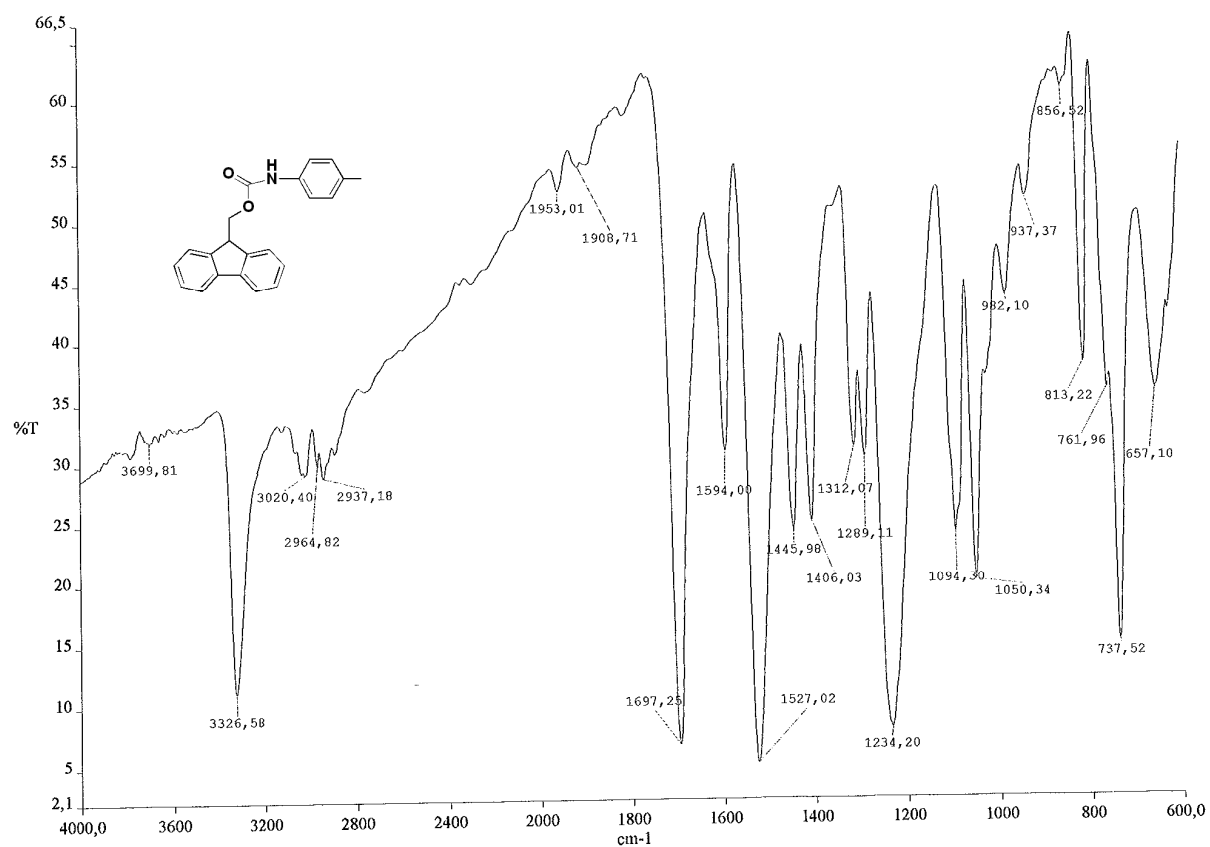

Infrared spectra of of *N*-(9-fluorenylmethoxycarbonyl)-4-methylaniline (**3b**).



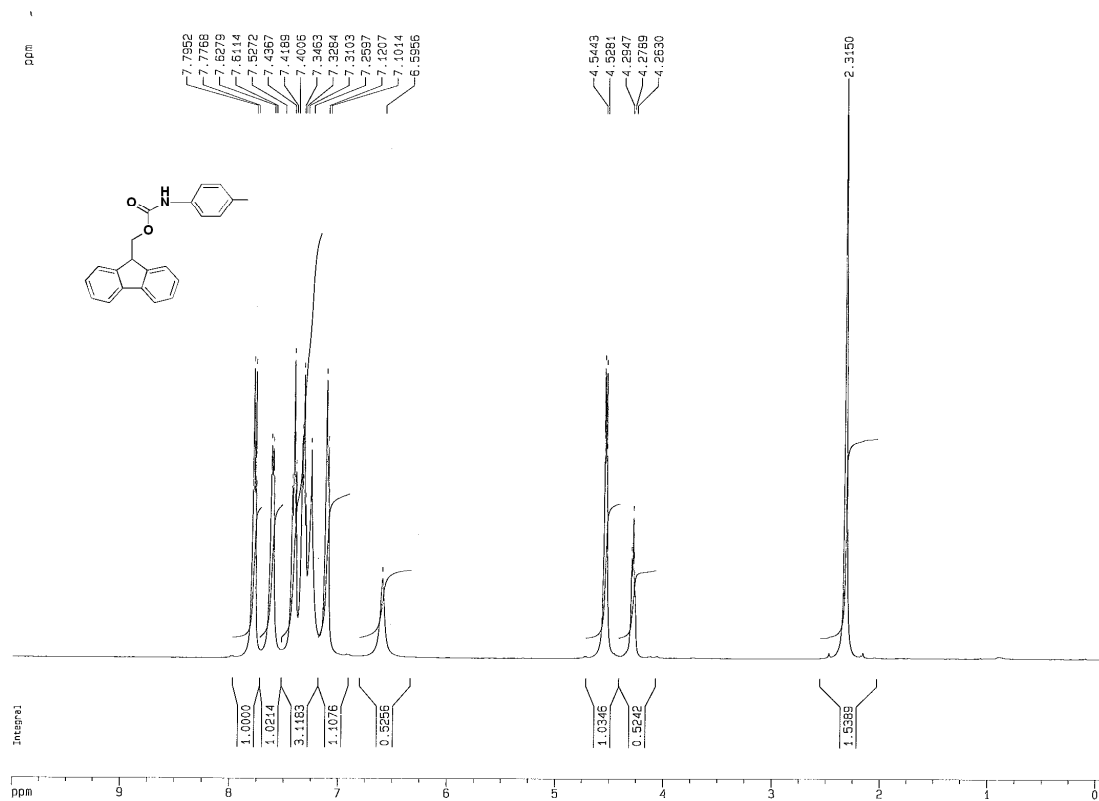

Proton NMR spectra of *N*-(9-fluorenylmethoxycarbonyl)-4-methylaniline (**3b**).

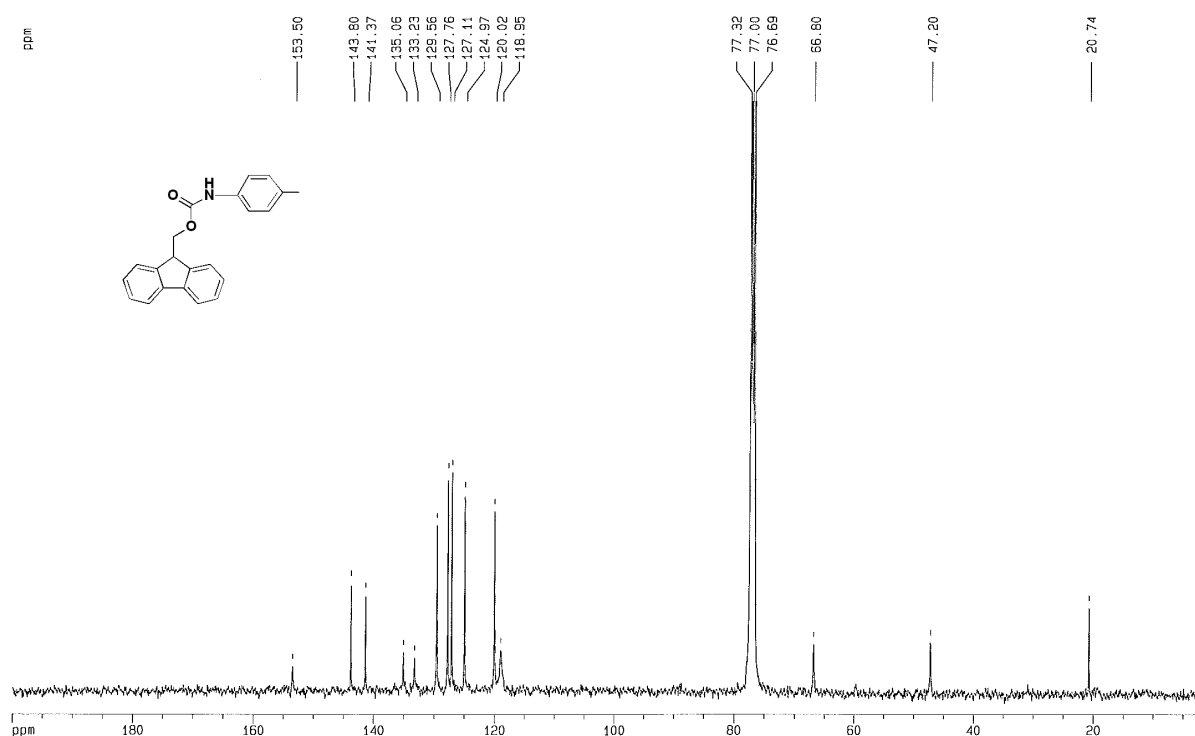

Carbon NMR spectra of *N*-(9-fluorenylmethoxycarbonyl)-4-methylaniline (**3b**).

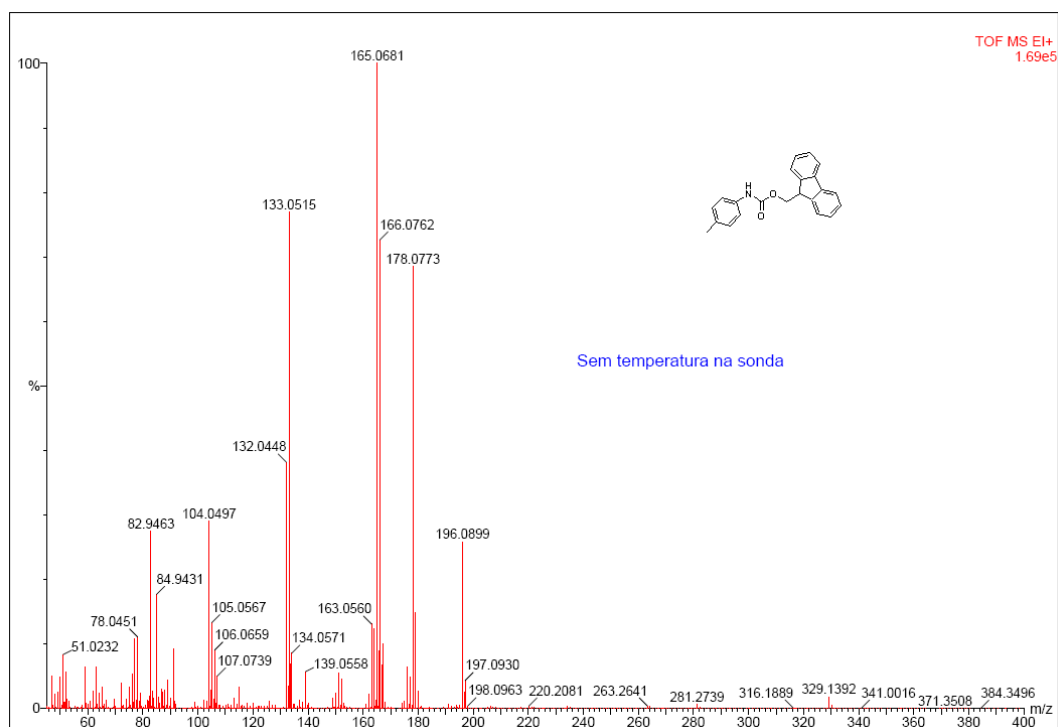

### Electron impact mass spectra of *N*-(9-fluorenylmethoxycarbonyl)-4-methylaniline (**3b**).

Monoisotopic Mass, Odd and Even Electron Ions  
 30 formula(e) evaluated with 2 results within limits (up to 50 closest results for each mass)  
 Elements Used:  
 12C: 20-22 13C: 0-2 H: 20-20 N: 1-1 O: 2-2

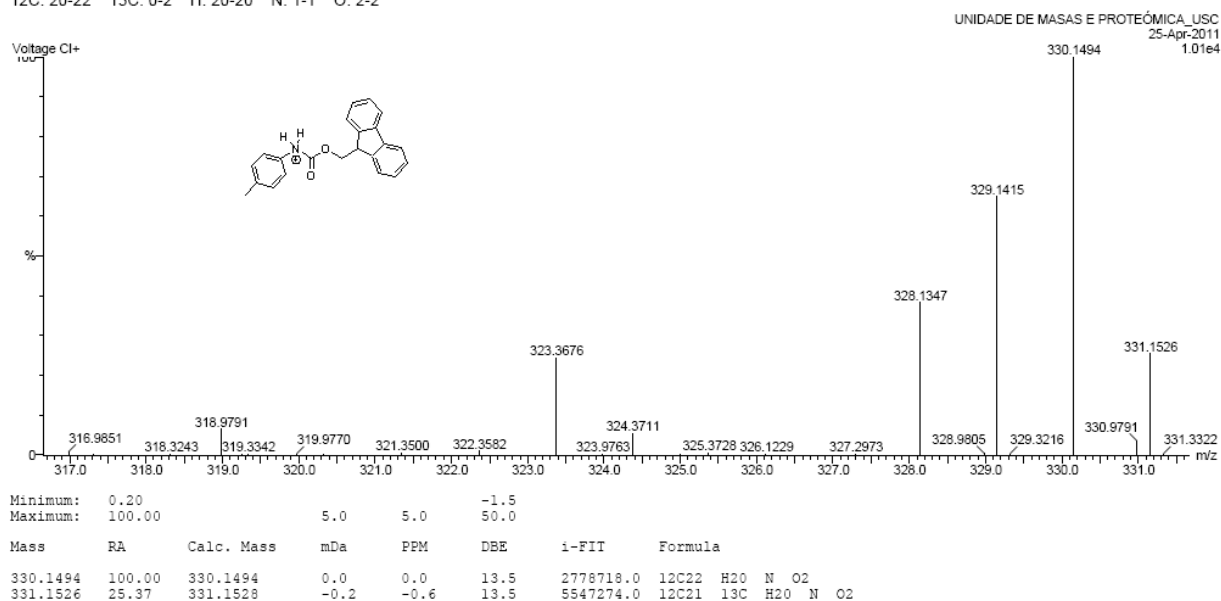

### High resolution chemical ionization mass spectra of *N*-(9-fluorenylmethoxycarbonyl)-4-methylaniline (**3b**).

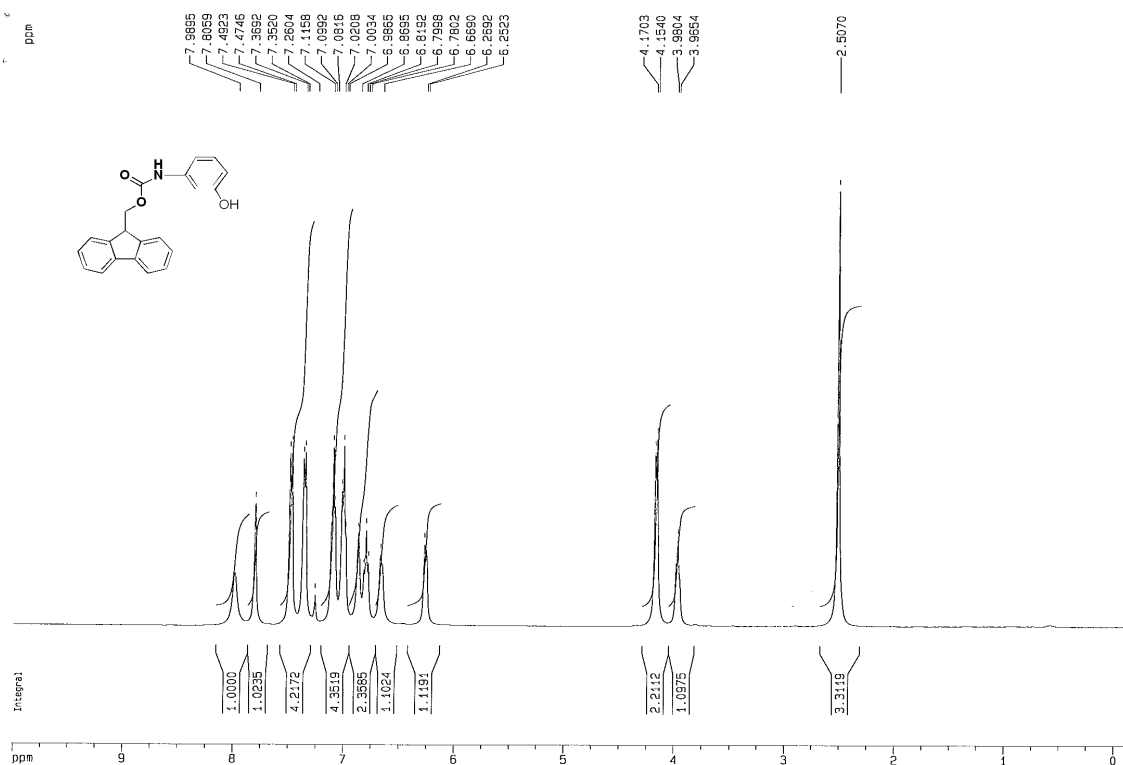

Proton NMR spectra of *N*-(9-fluorenylmethoxycarbonyl)-3-hydroxyaniline (**3c**).

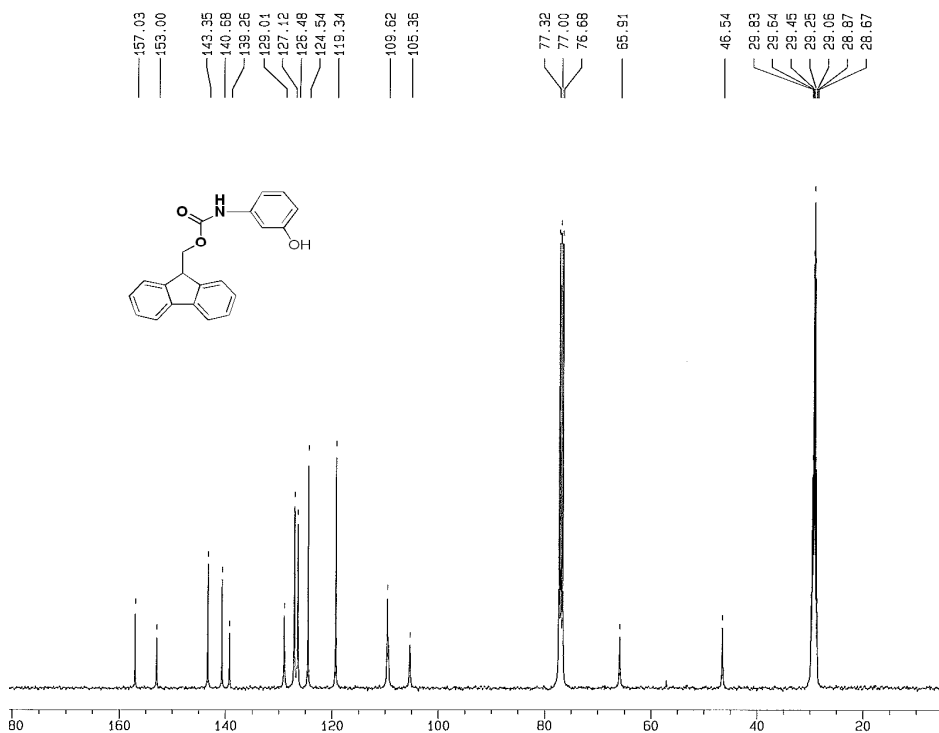

Carbon NMR spectra of *N*-(9-fluorenylmethoxycarbonyl)-3-hydroxyaniline (**3c**).

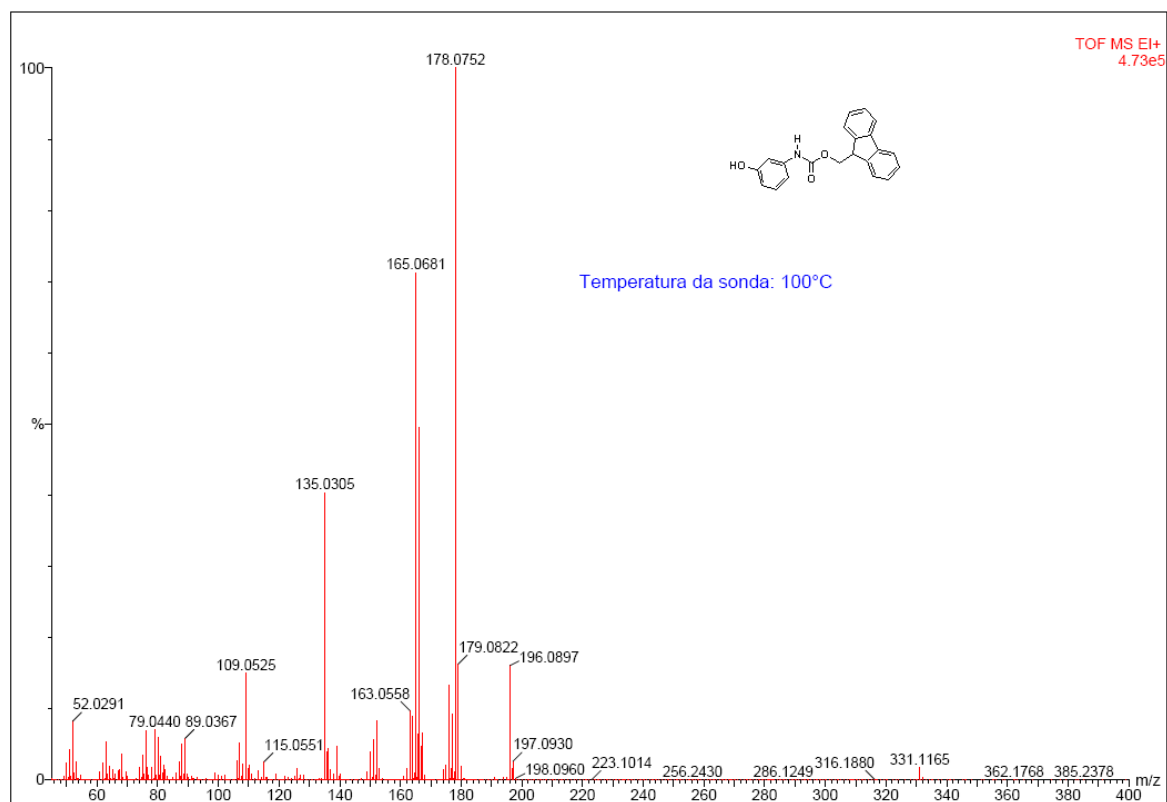

Electron impact mass spectra of *N*-(9-fluorenylmethoxycarbonyl)-3-hydroxyaniline (**3c**).

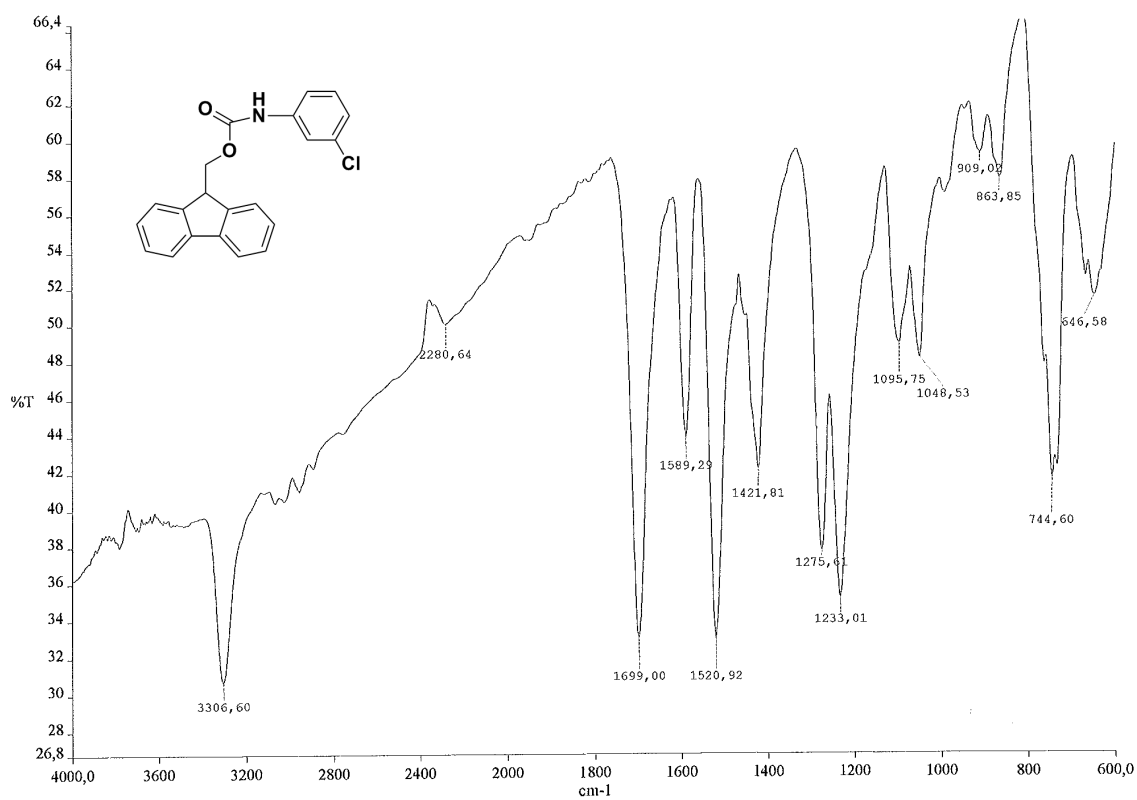

IR spectra of *N*-(9-fluorenylmethoxycarbonyl)-3-chloroaniline (**3d**).

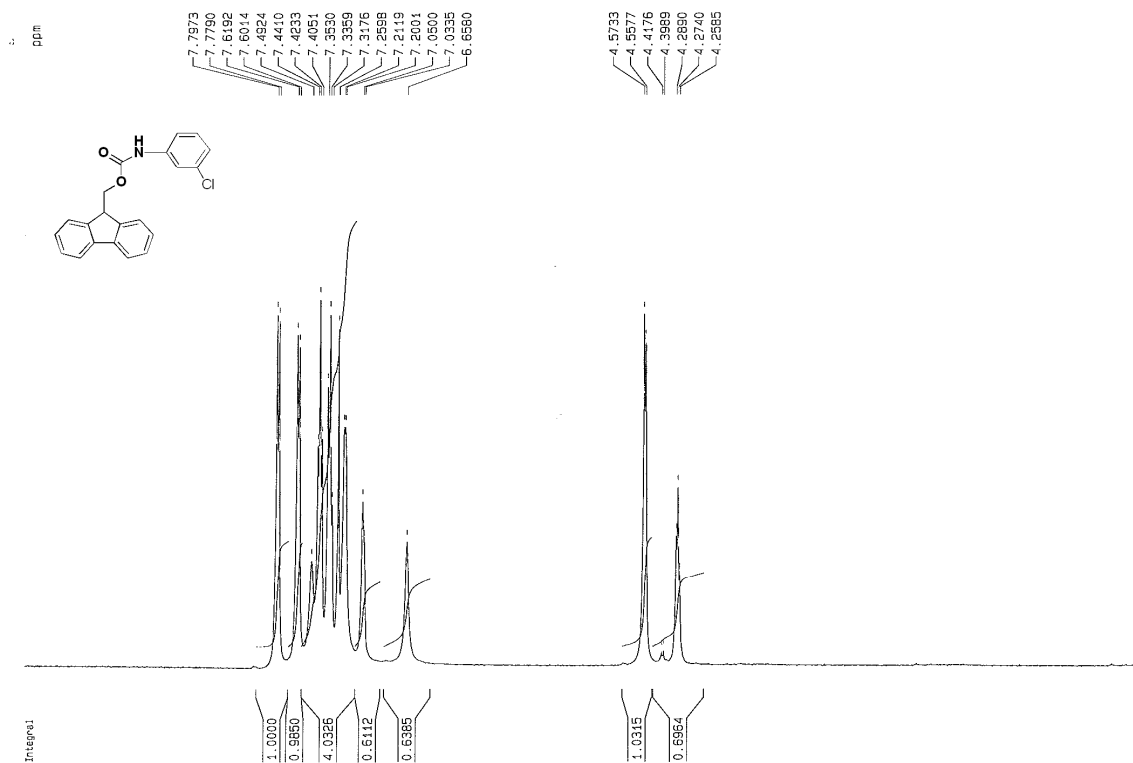

Proton NMR spectra of *N*-(9-fluorenylmethoxycarbonyl)-3-chloroaniline (**3d**).

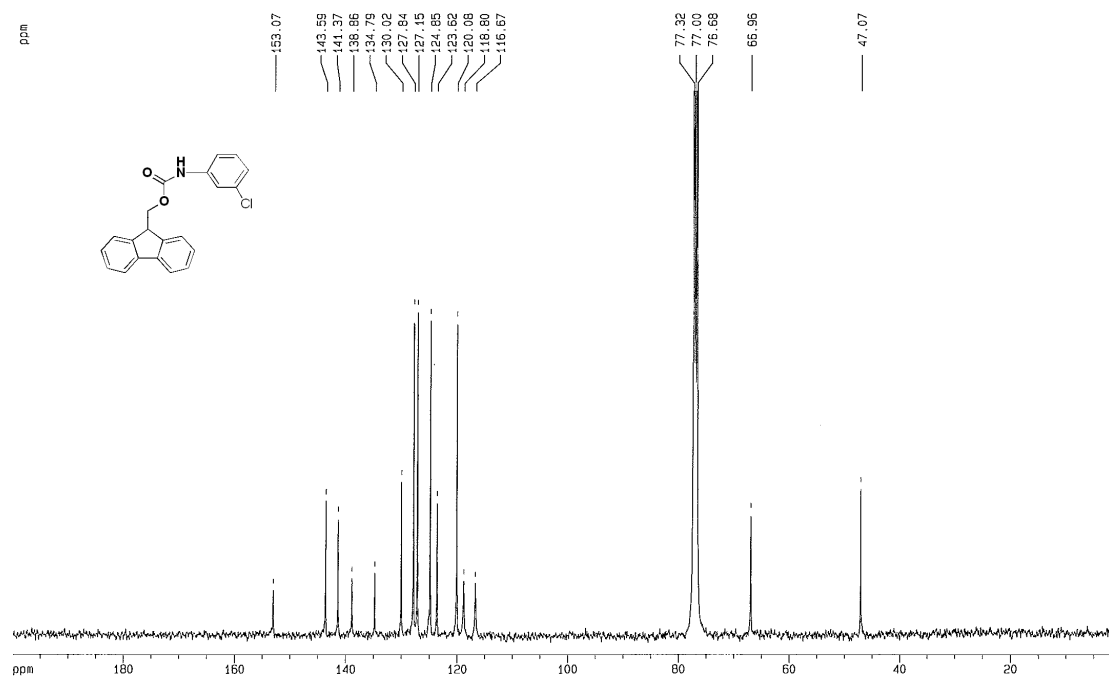

Carbon NMR spectra of *N*-(9-fluorenylmethoxycarbonyl)-3-chloroaniline (**3d**).

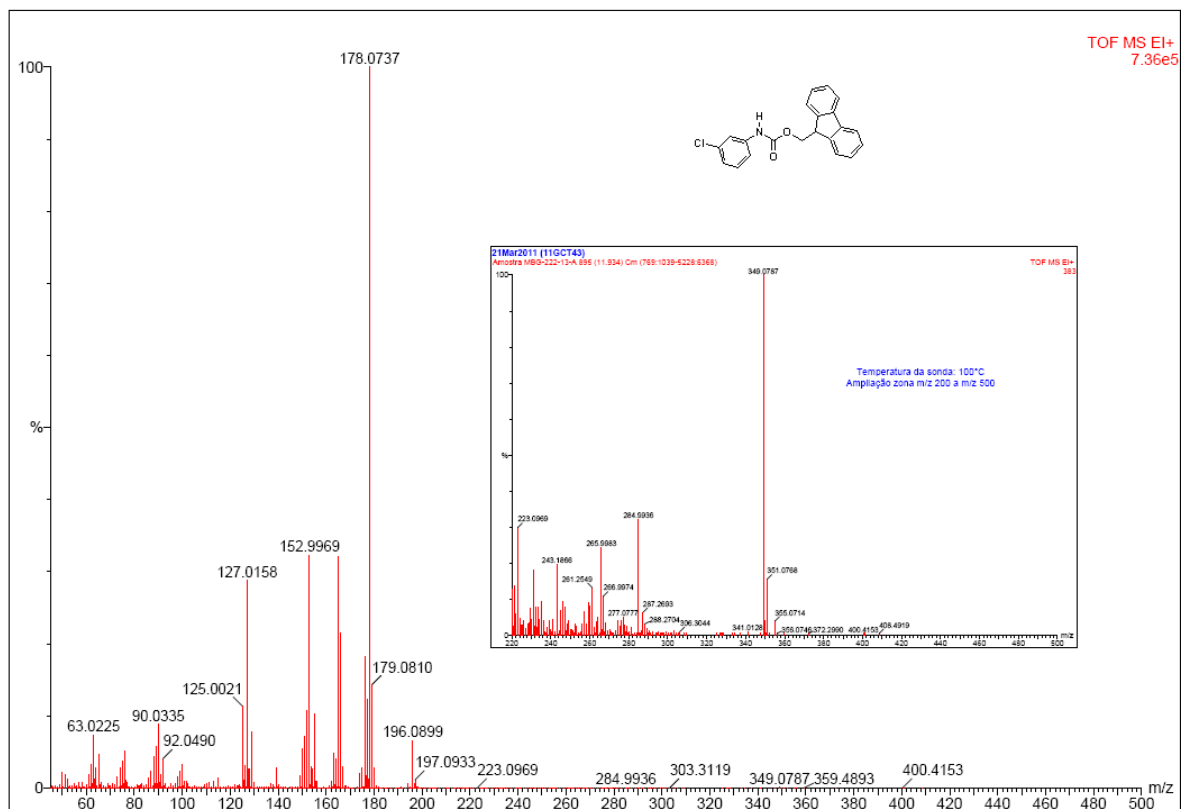

Electron impact mass spectra of *N*-(9-fluorenylmethoxycarbonyl)-3-chloroaniline (**3d**).

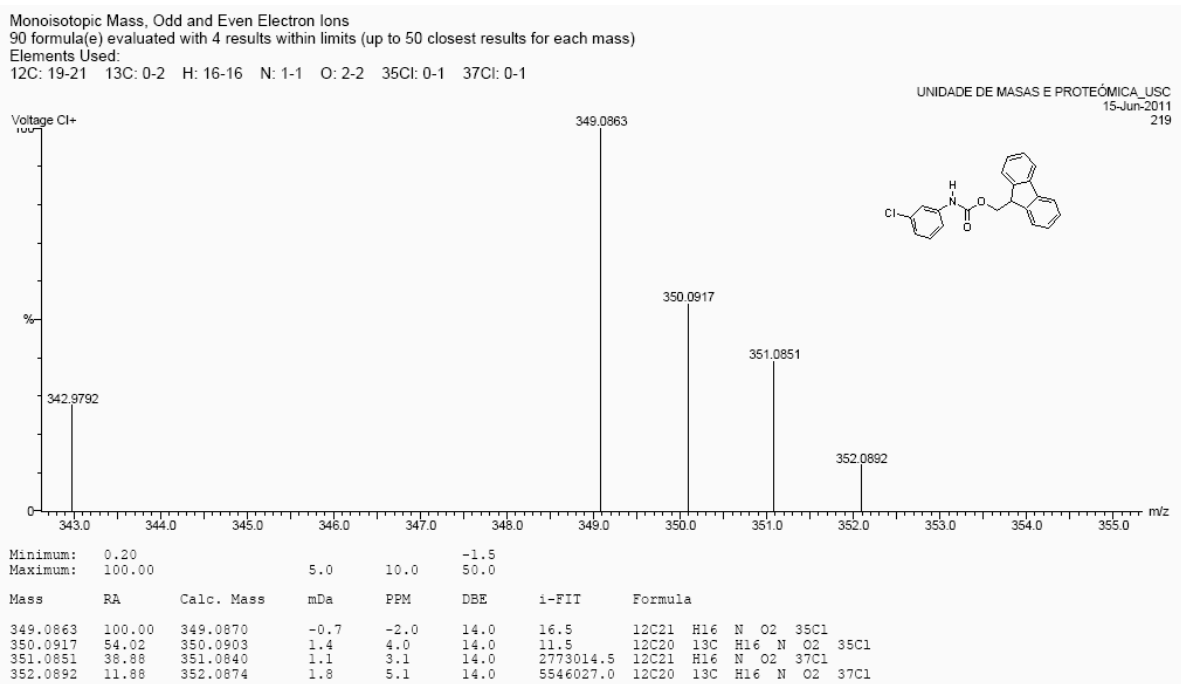

High resolution chemical ionization mass spectra of *N*-(9-fluorenylmethoxycarbonyl)-3-chloroaniline (**3d**).

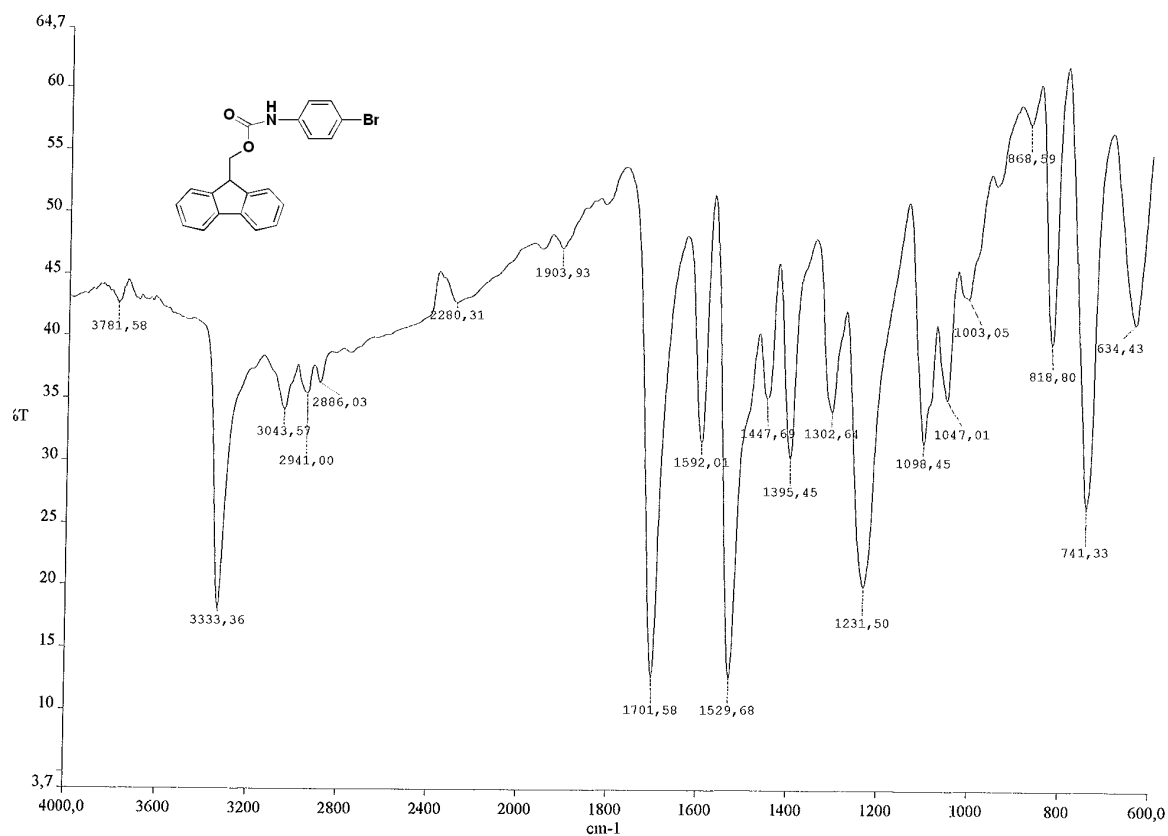

Infrared spectra of *N*-(9-fluorenylmethoxycarbonyl)-4-bromoaniline (**3e**).



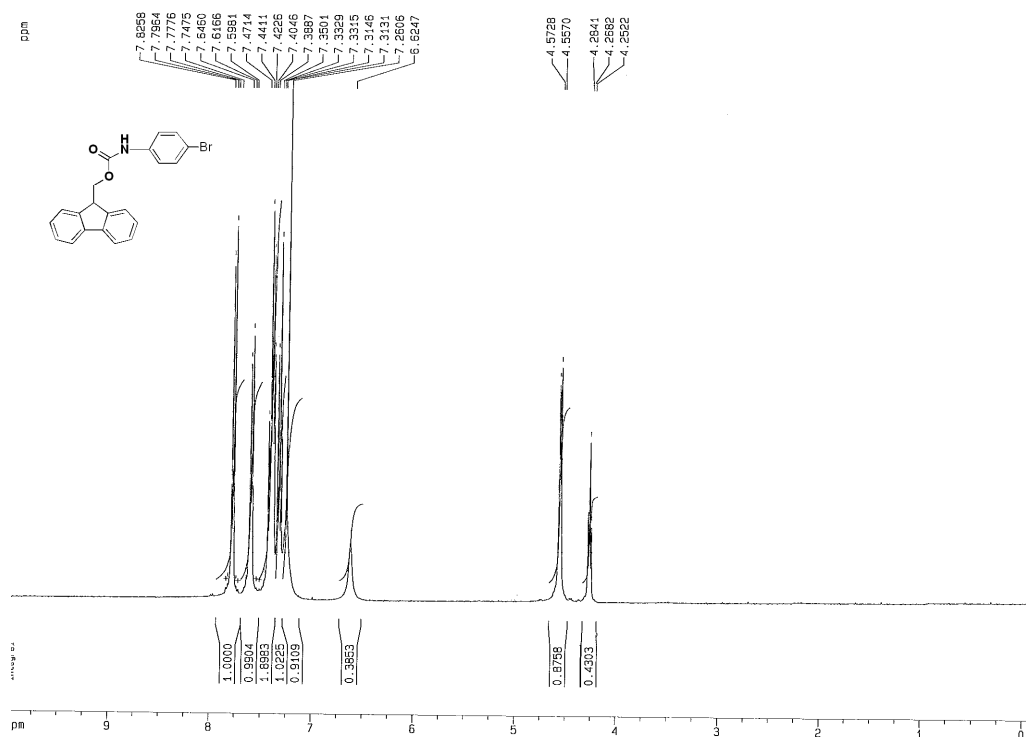

Proton NMR spectra of *N*-(9-fluorenylmethoxycarbonyl)-4-bromoaniline (**3e**).

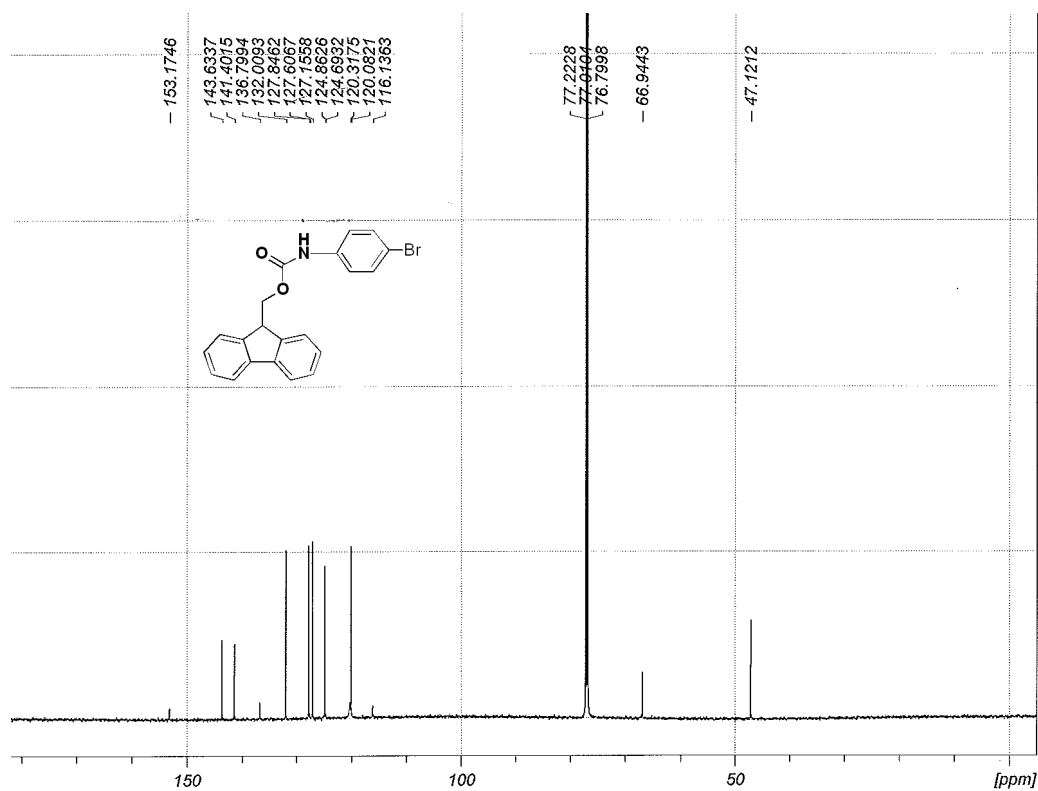

Carbon NMR spectra of *N*-(9-fluorenylmethoxycarbonyl)-4-bromoaniline (**3e**).

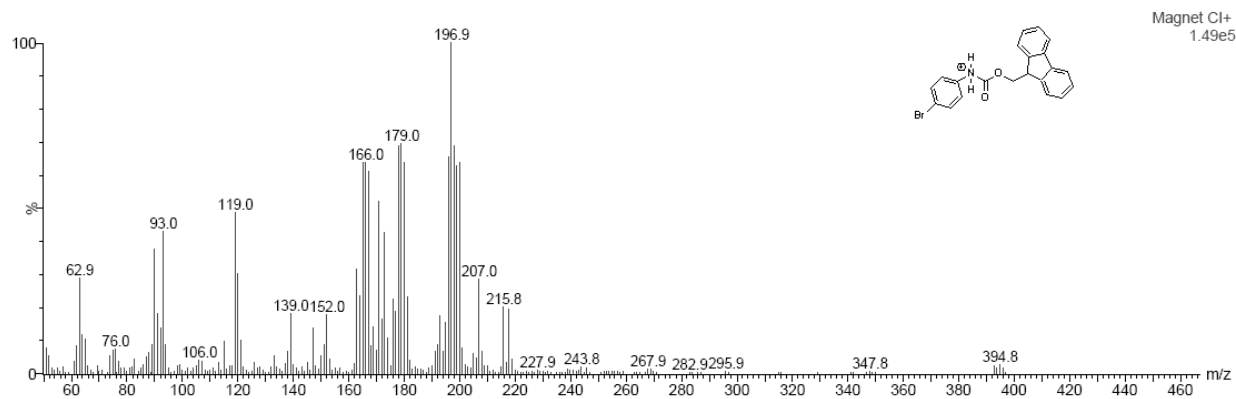

Electron impact mass spectra of *N*-(9-fluorenylmethoxycarbonyl)-4-bromoaniline (**3e**).

Monoisotopic Mass, Odd and Even Electron Ions  
 442 formula(e) evaluated with 5 results within limits (up to 50 best isotopic matches for each mass)  
 Elements Used:  
 12C: 19-21 13C: 0-2 H: 16-16 N: 1-1 O: 2-2 79Br: 0-1 81Br: 0-1

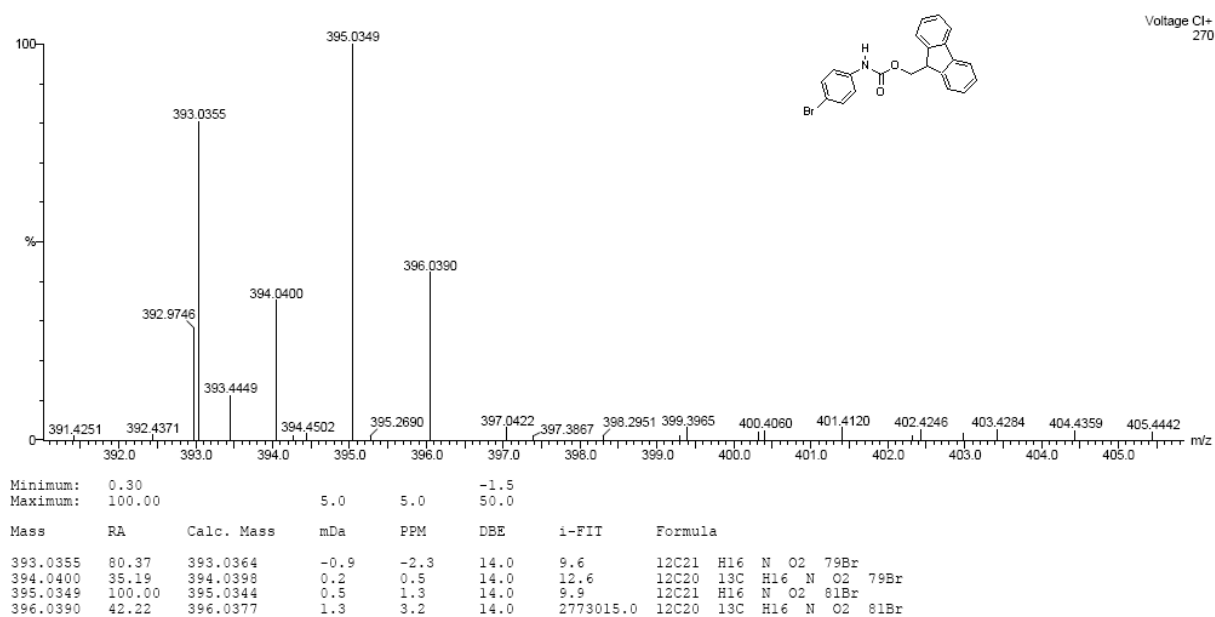

High resolution chemical ionization mass spectra of *N*-(9-fluorenylmethoxycarbonyl)-4-bromoaniline (**3e**).

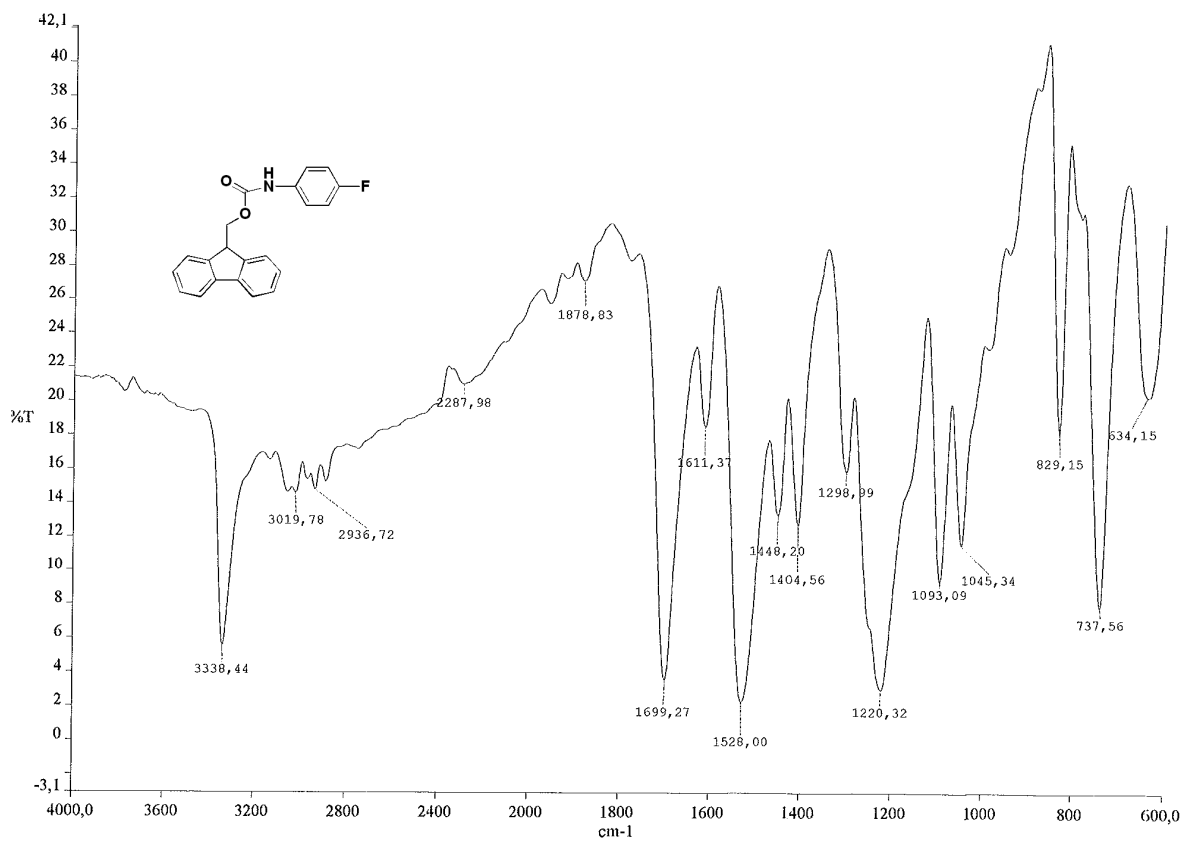

Infrared spectra of *N*-(9-fluorenylmethoxycarbonyl)-4-fluoranyliline (**3f**).

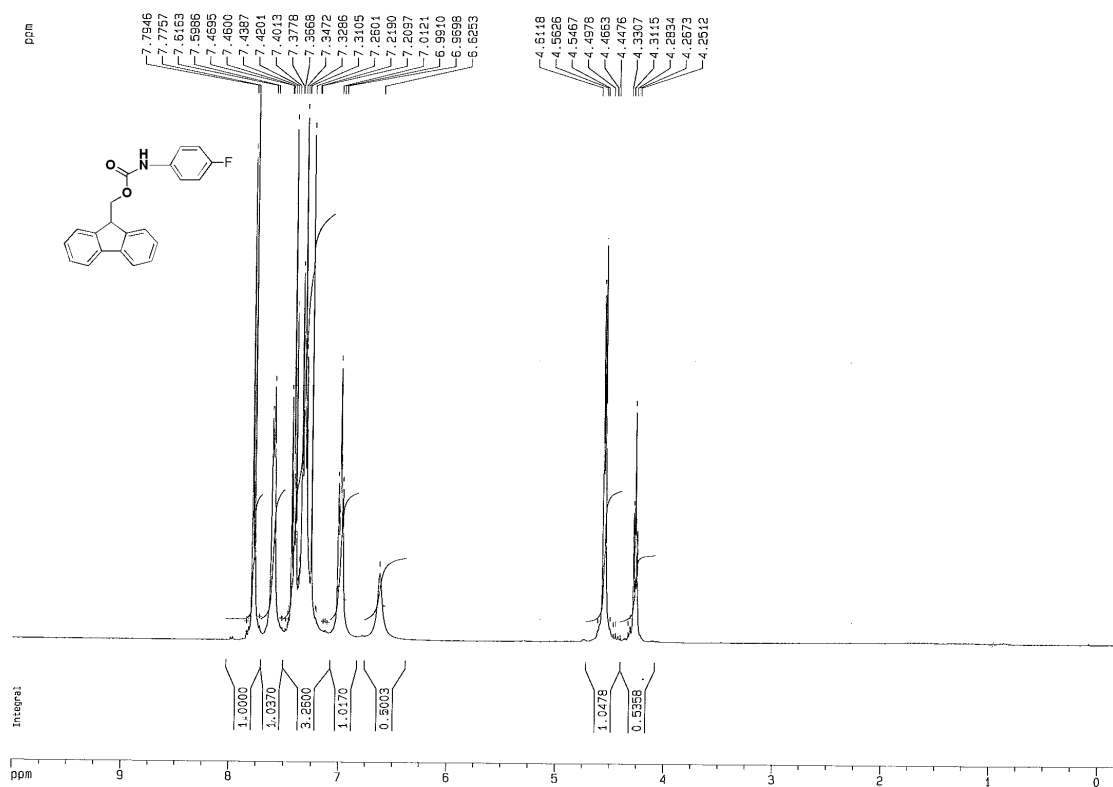

Proton NMR spectra of *N*-(9-fluorenylmethoxycarbonyl)-4-fluoranyliline (**3f**).

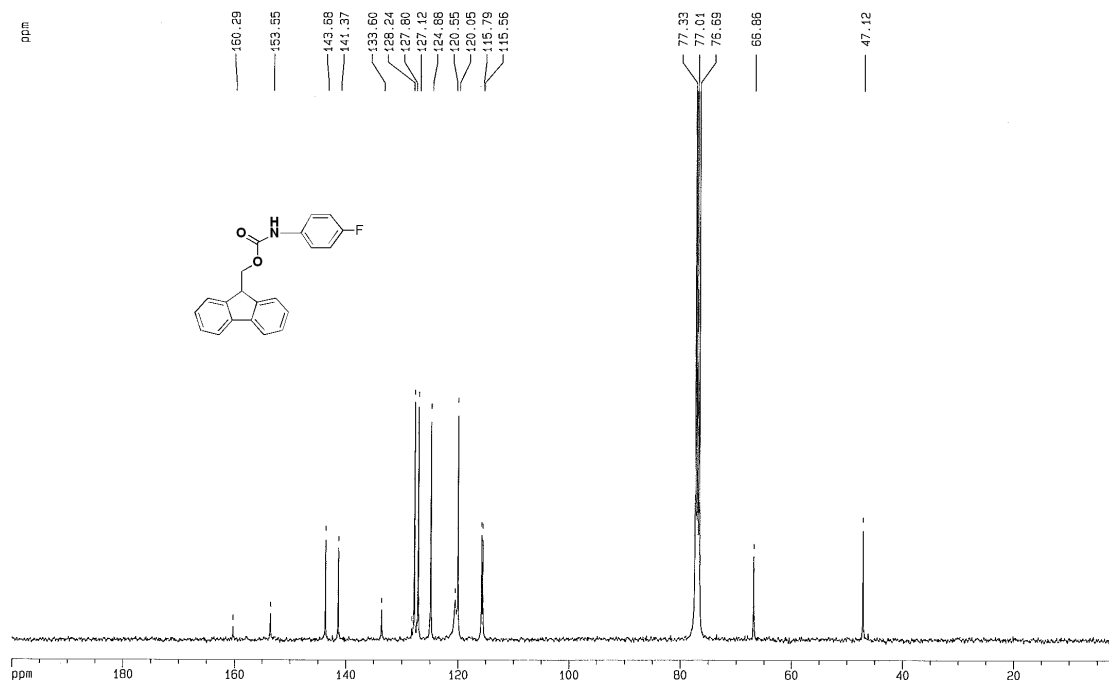

Carbon NMR spectra of *N*-(9-fluorenylmethoxycarbonyl)-4-fluoranyliline (**3f**).

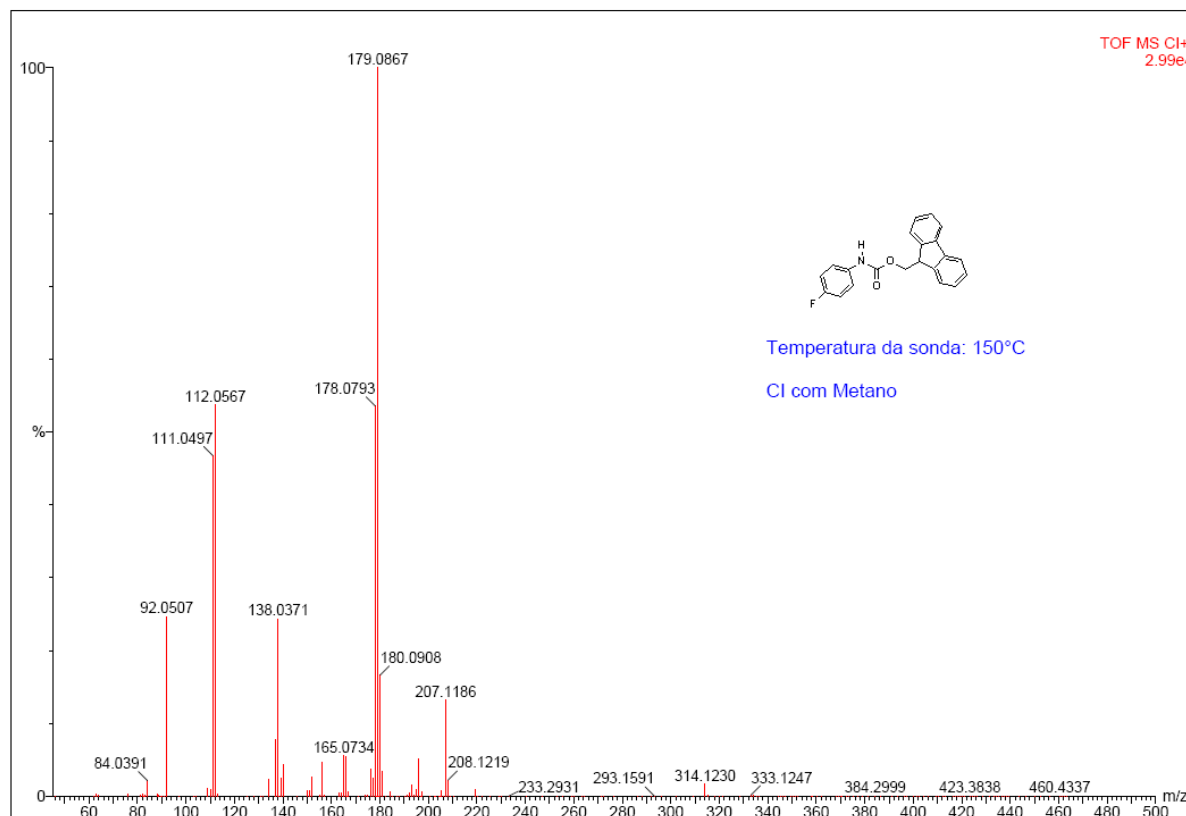

Chemical ionization mass spectra of *N*-(9-fluorenylmethoxycarbonyl)-4-fluoranyliline (**3f**).

Monoisotopic Mass, Odd and Even Electron Ions  
 41 formula(e) evaluated with 2 results within limits (up to 50 closest results for each mass)  
 Elements Used:  
 12C: 19-21 13C: 0-2 H: 16-16 N: 1-1 O: 2-2 F: 1-1

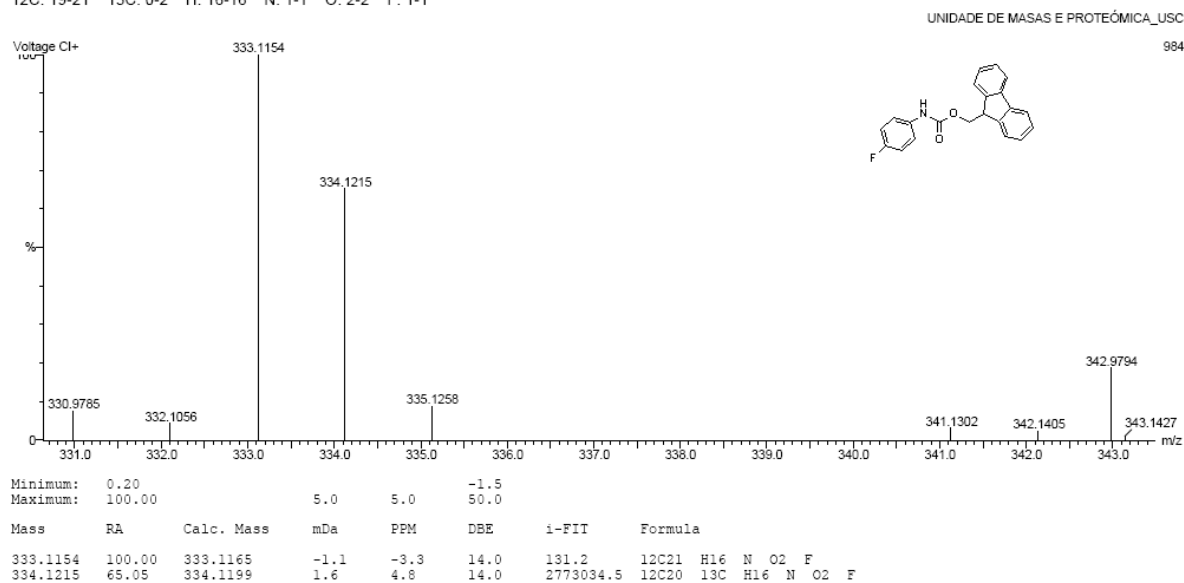

High resolution chemical ionization mass spectra of *N*-(9-fluorenylmethoxycarbonyl)-4-fluoranyliline (**3f**).

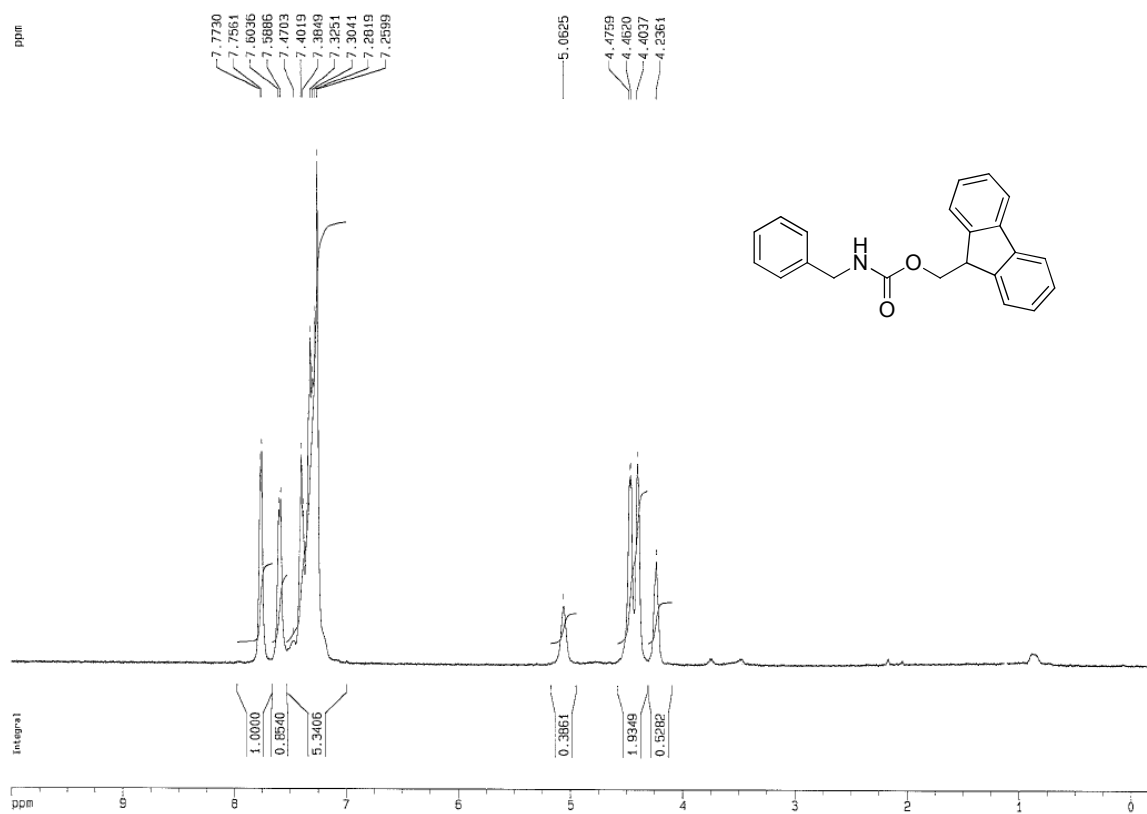

Proton NMR spectra of *N*-(9-fluorenylmethoxycarbonyl)benzylamine (**3g**).

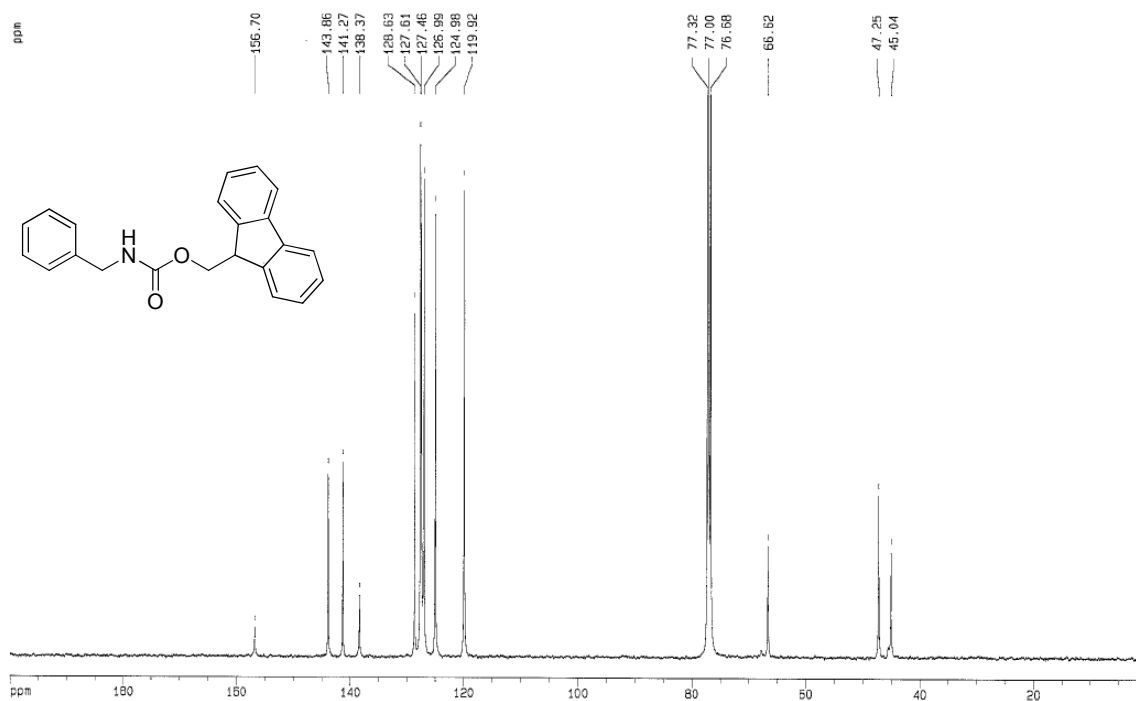

Carbon NMR spectra of *N*-(9-fluorenylmethoxycarbonyl)benzylamine (**3g**).

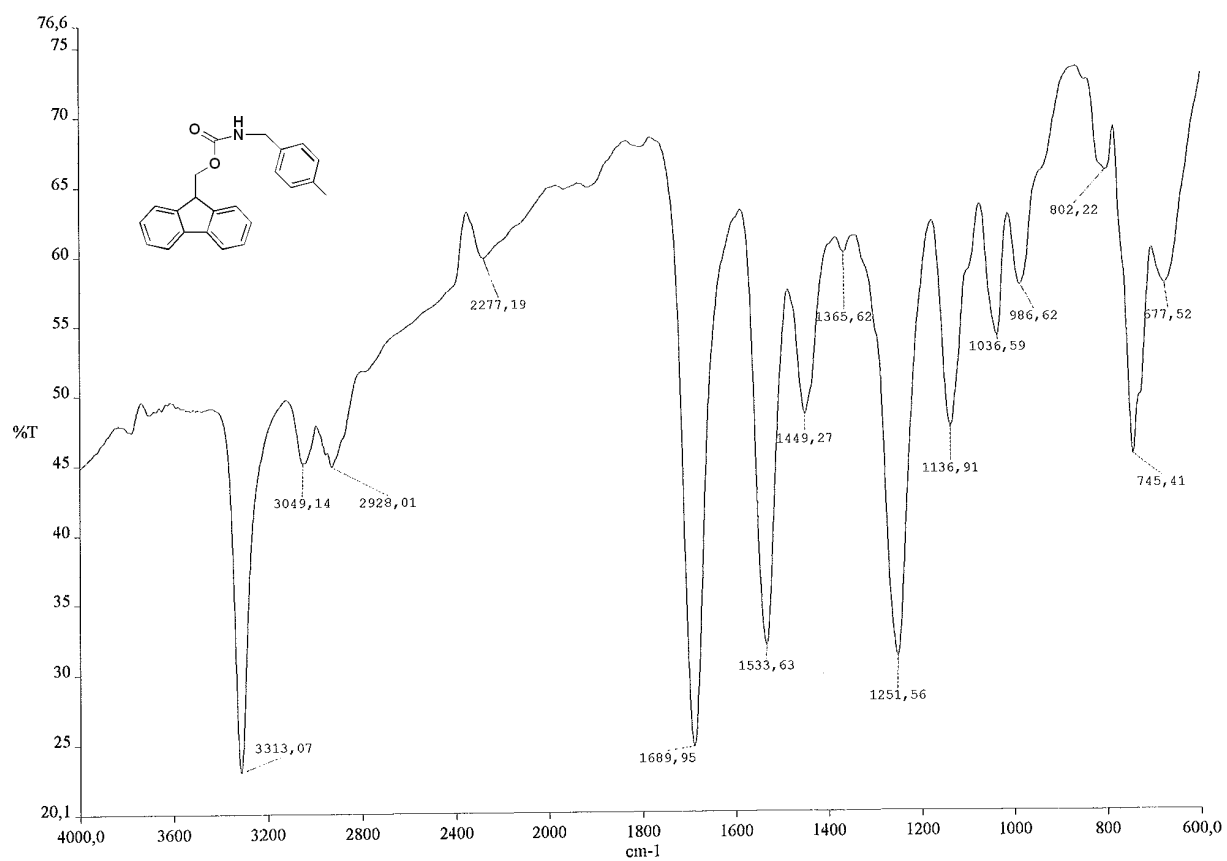

Infrared spectra of *N*-(9-fluorenylmethoxycarbonyl)-4-methylbenzylamine (**3h**).

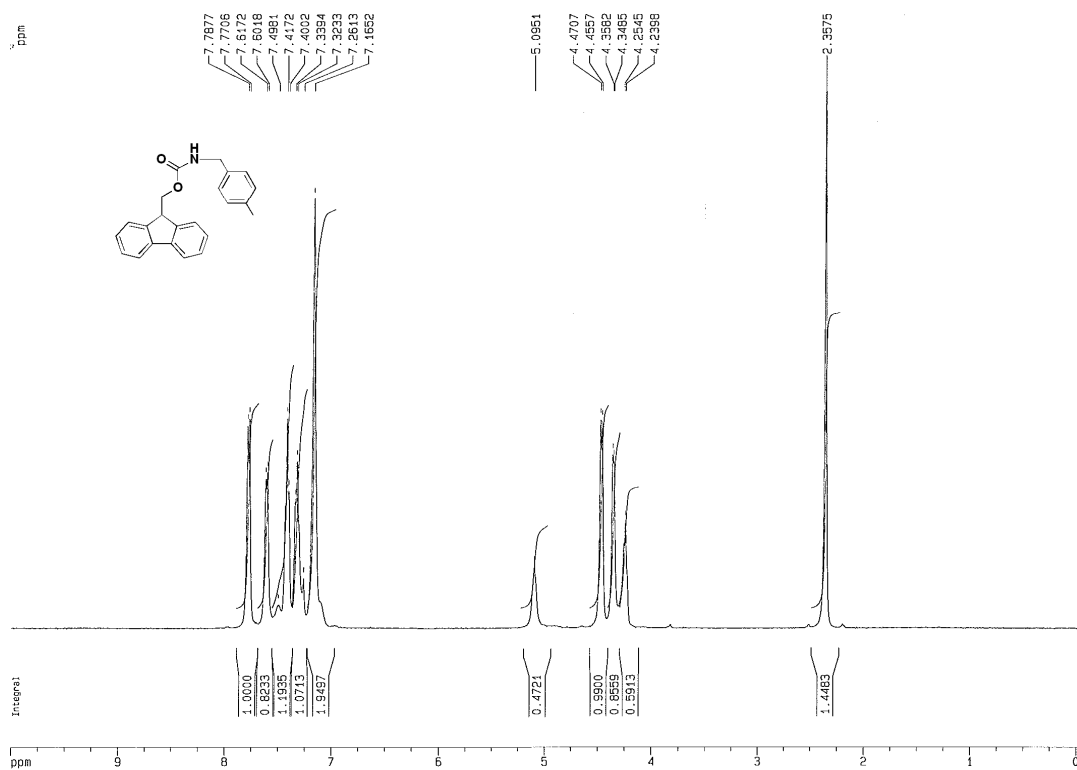

Proton NMR spectra of *N*-(9-fluorenylmethoxycarbonyl)-4-methylbenzylamine (**3h**).

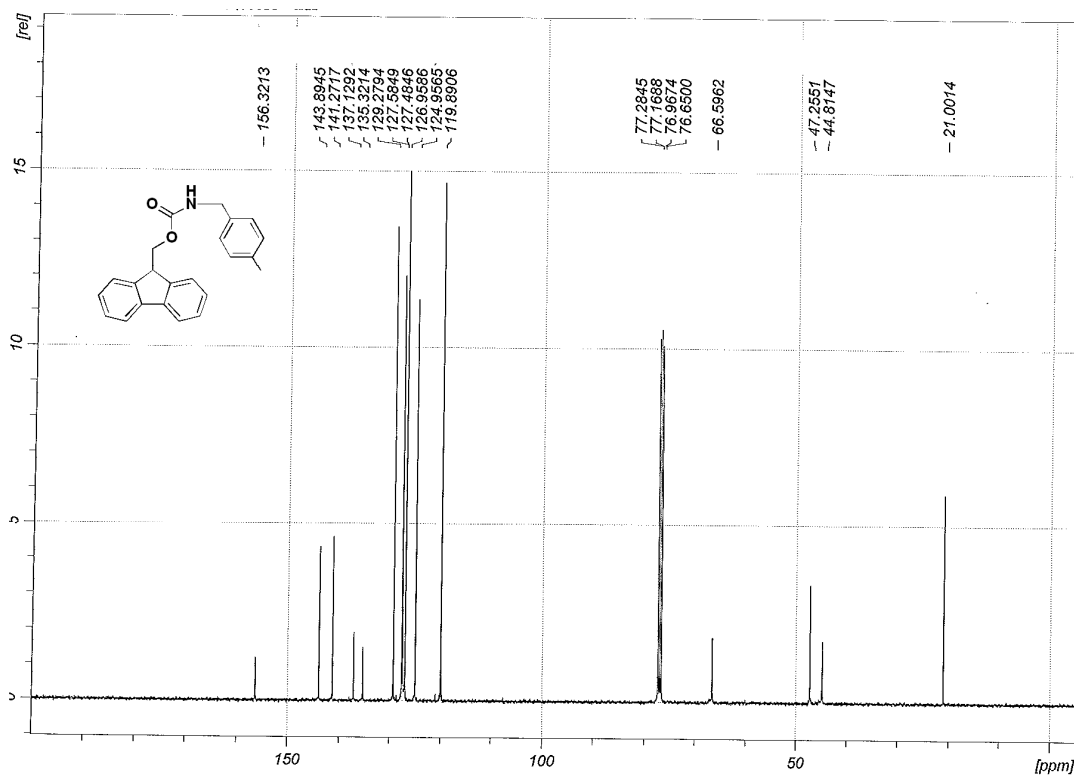

Carbon NMR spectra of *N*-(9-fluorenylmethoxycarbonyl)-4-methylbenzylamine (**3h**).



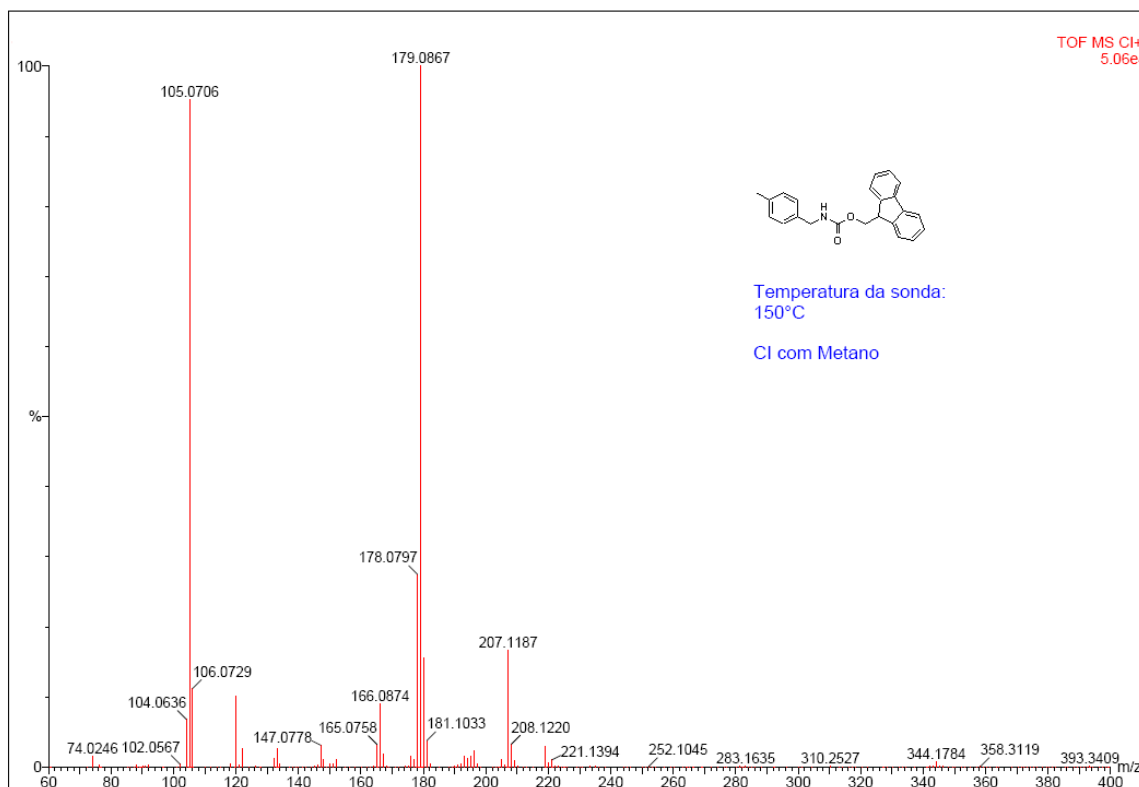

Chemical ionization mass spectra of *N*-(9-fluorenylmethoxycarbonyl)-4-methylbenzylamine (3h).

Monoisotopic Mass, Odd and Even Electron Ions  
 33 formula(e) evaluated with 3 results within limits (up to 50 closest results for each mass)  
 Elements Used:  
 12C: 21-23 13C: 0-2 H: 22-22 N: 1-1 O: 2-2

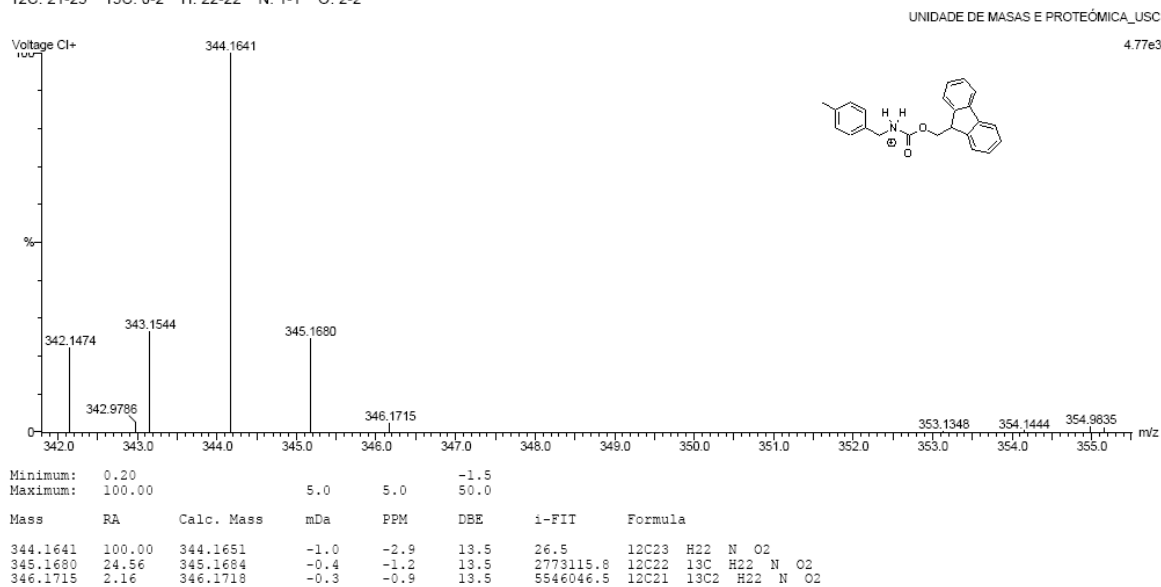

High resolution chemical ionization mass spectra of *N*-(9-fluorenylmethoxycarbonyl)-4-methylbenzylamine (3h).

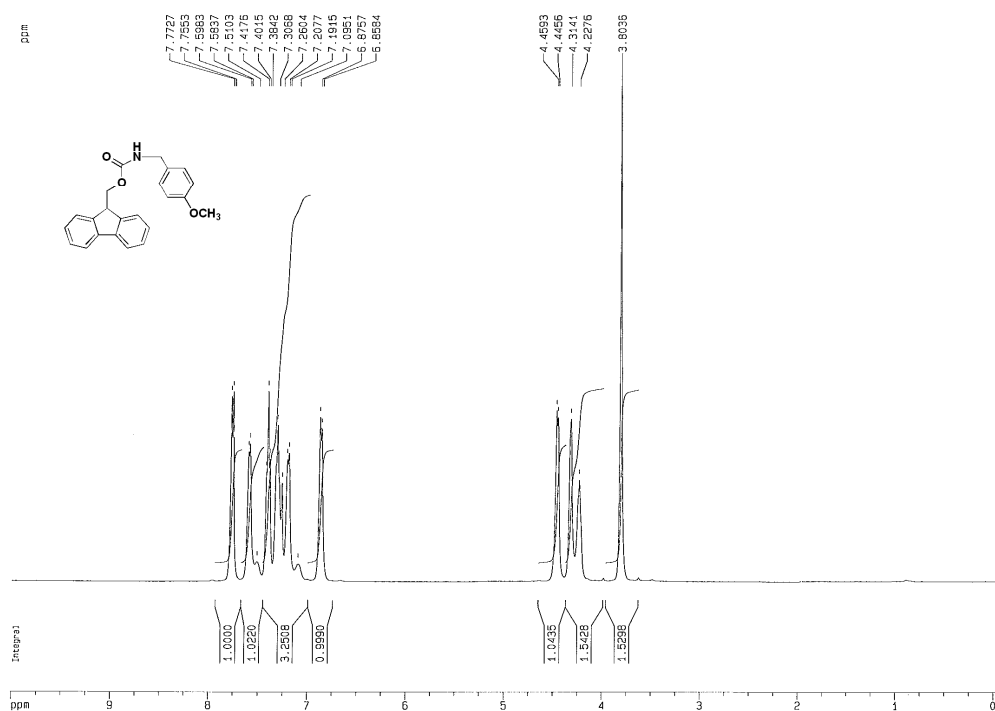

Proton NMR spectra of *N*-(9-fluorenylmethoxycarbonyl)-4-methoxybenzylamine (**3i**).

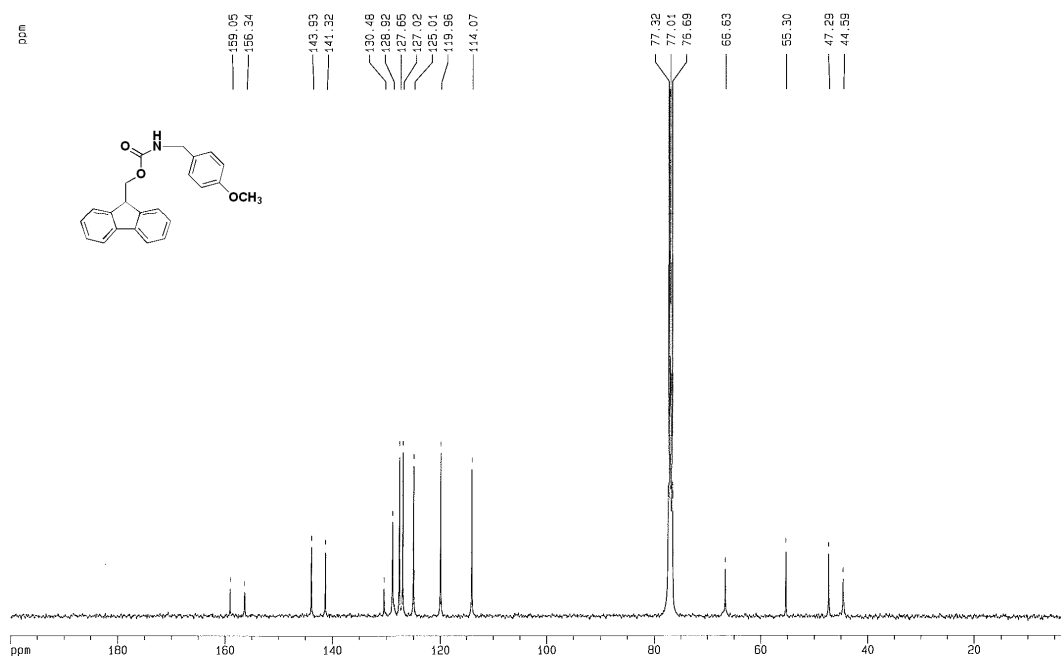

Carbon NMR spectra of *N*-(9-fluorenylmethoxycarbonyl)-4-methoxybenzylamine (**3i**).

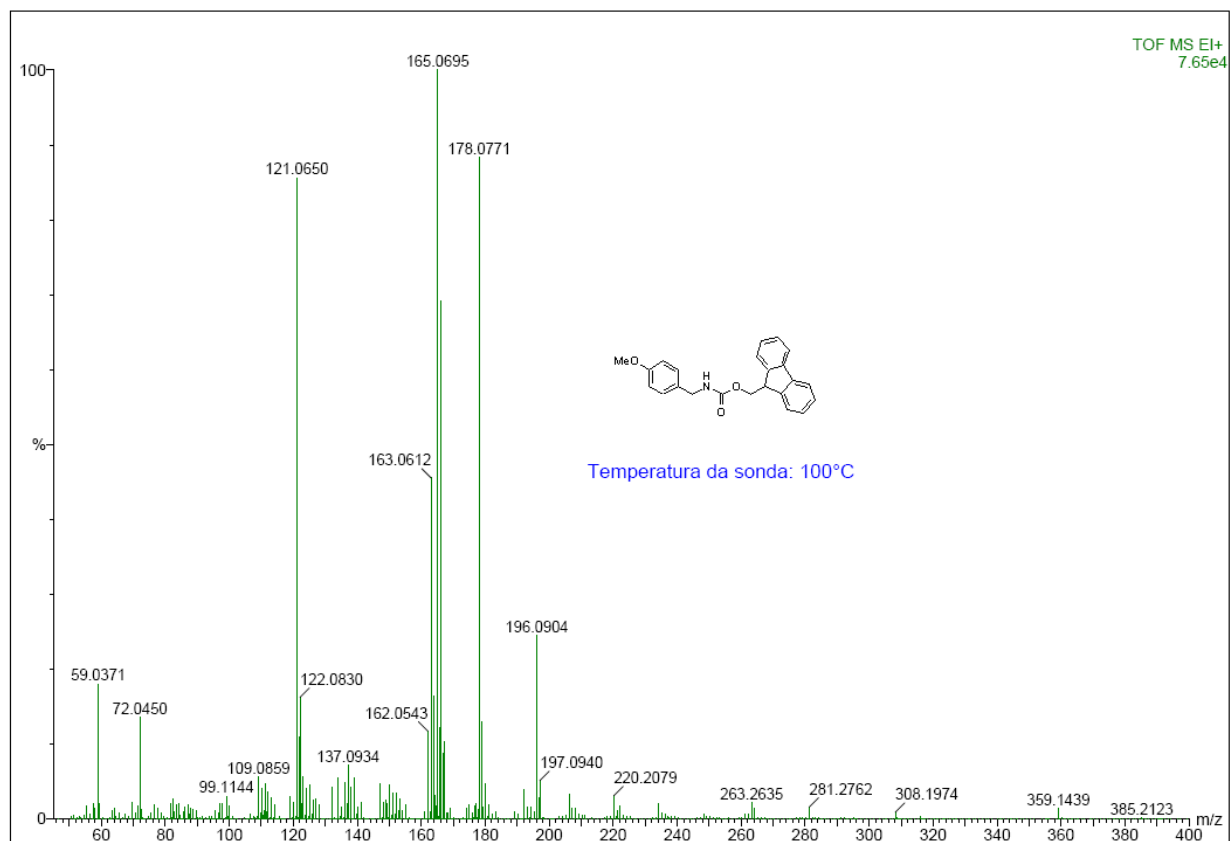

Electron impact mass spectra of *N*-(9-fluorenylmethoxycarbonyl)-4-methoxybenzylamine (**3i**).

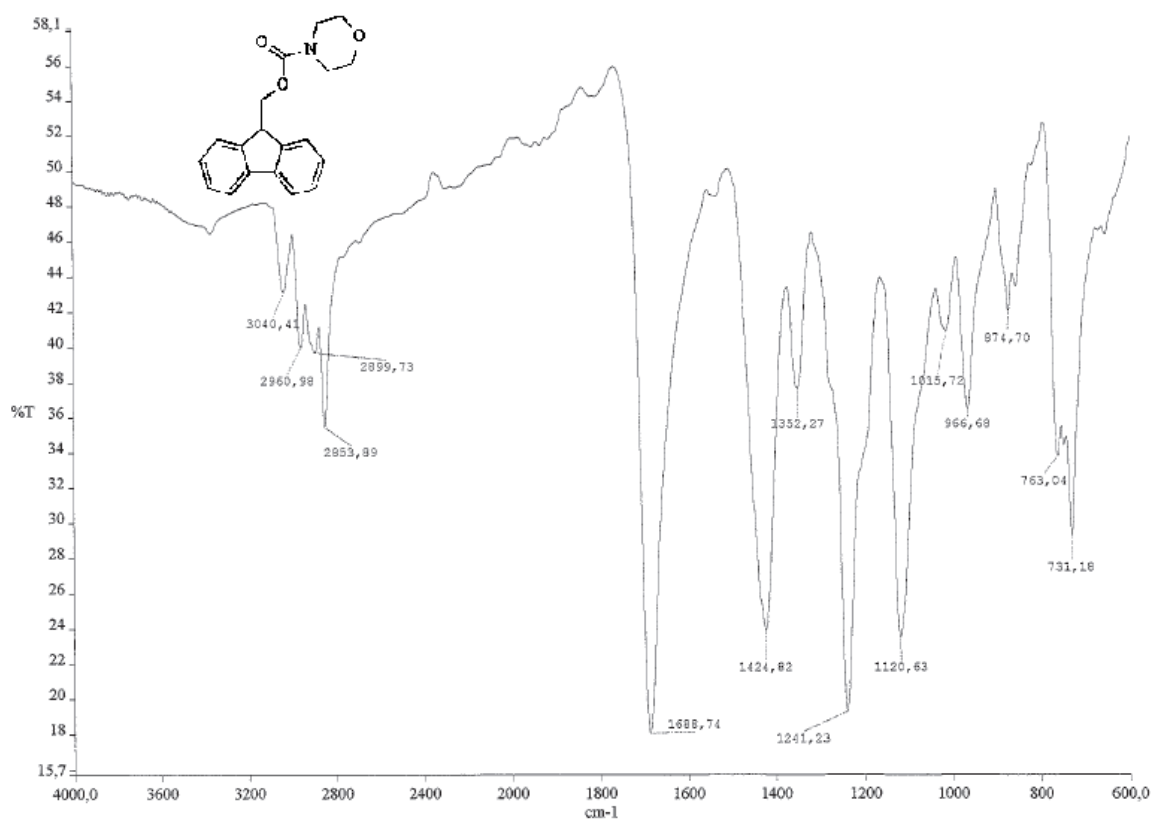

Infrared spectra of *N*-(9-Fluorenylmethoxycarbonyl)morpholine (**3j**).

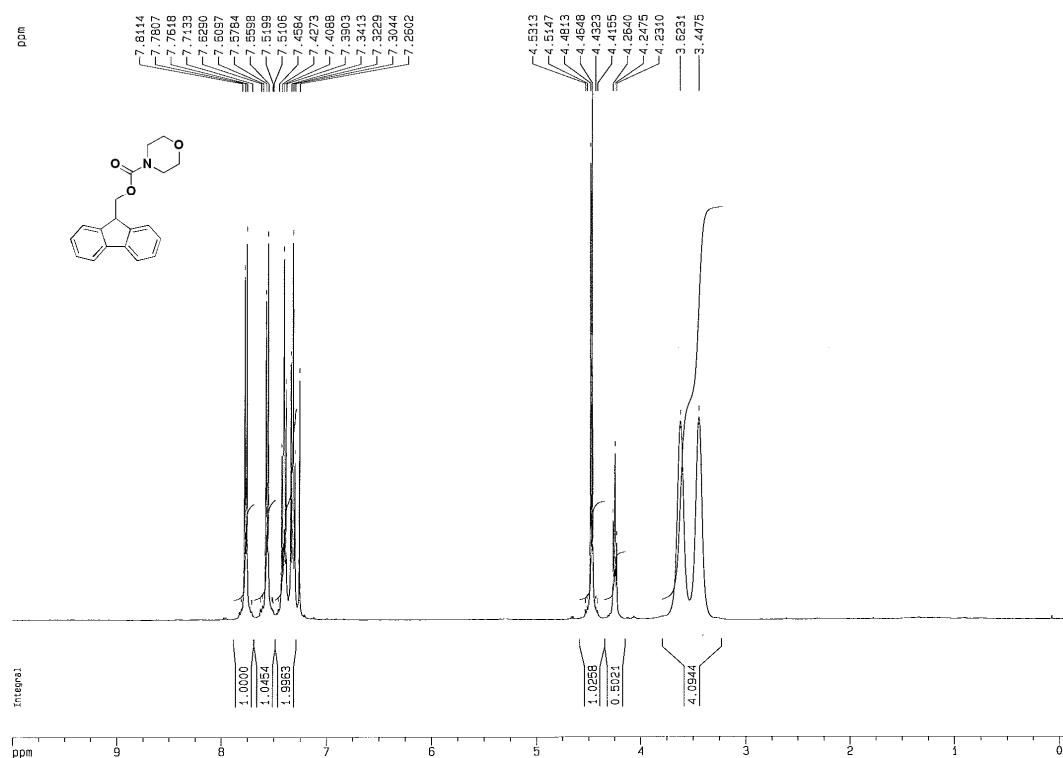

Proton NMR spectra of *N*-(9-Fluorenylmethoxycarbonyl)morpholine (3j).

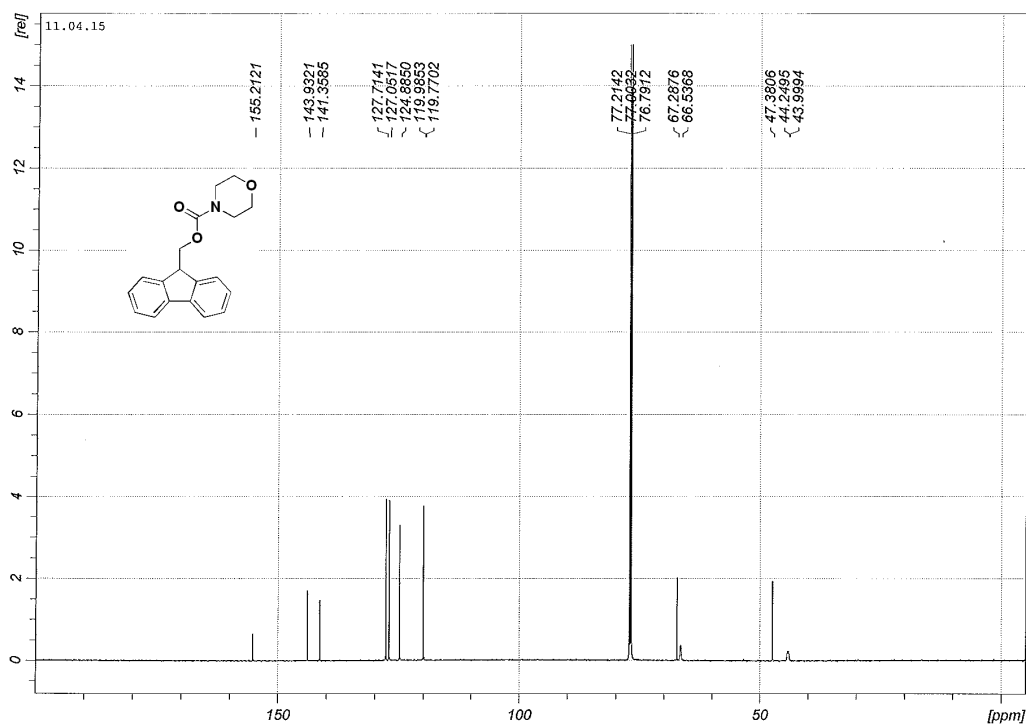

Carbon NMR spectra of *N*-(9-Fluorenylmethoxycarbonyl)morpholine (3j).

UNIDADE DE MASAS E PROTEÔMICA\_USC

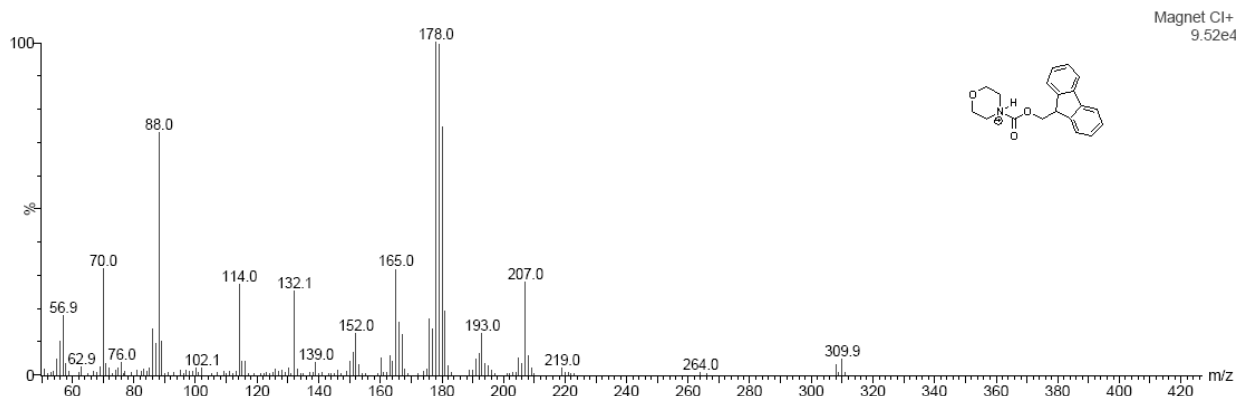

Chemical ionization mass spectra of *N*-(9-Fluorenylmethoxycarbonyl)morpholine (**3j**).

Monoisotopic Mass, Odd and Even Electron Ions  
 73 formula(e) evaluated with 3 results within limits (up to 50 closest results for each mass)  
 Elements Used:  
 12C: 17-19 13C: 0-2 H: 20-20 N: 1-1 O: 3-3

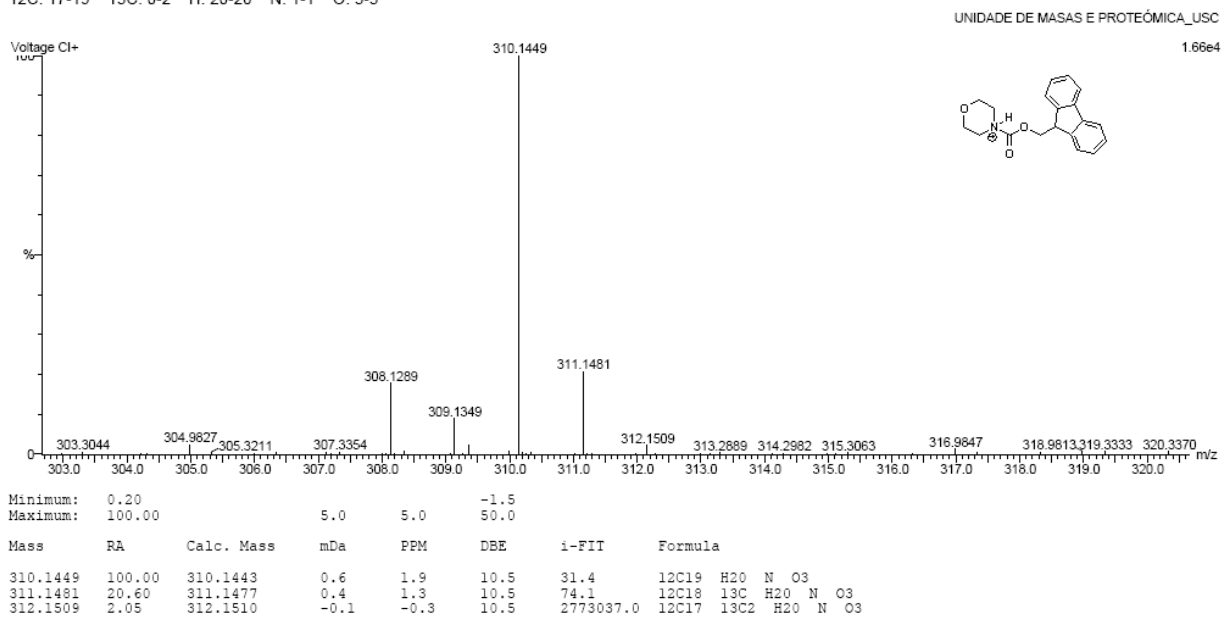

High resolution chemical ionization mass spectra of *N*-(9-Fluorenylmethoxycarbonyl)morpholine (**3j**).

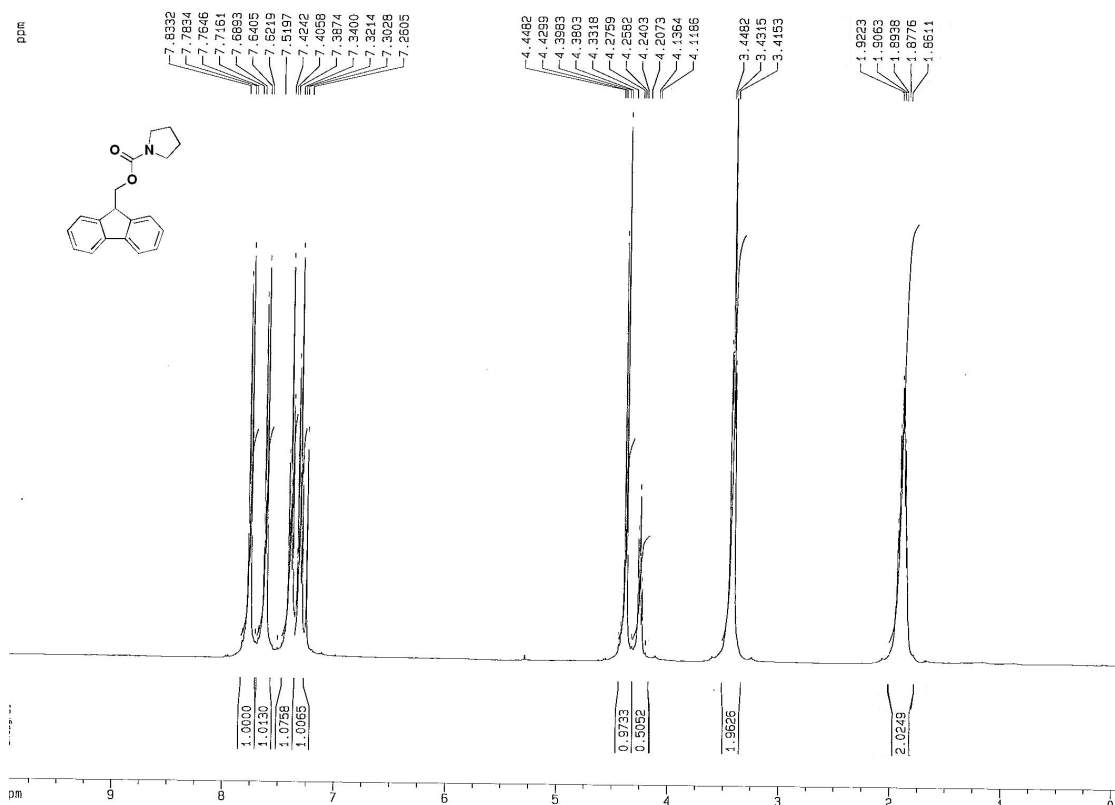

Proton NMR spectra of *N*-(9-Fluorenylmethoxycarbonyl)pyrrolidine (**3k**).

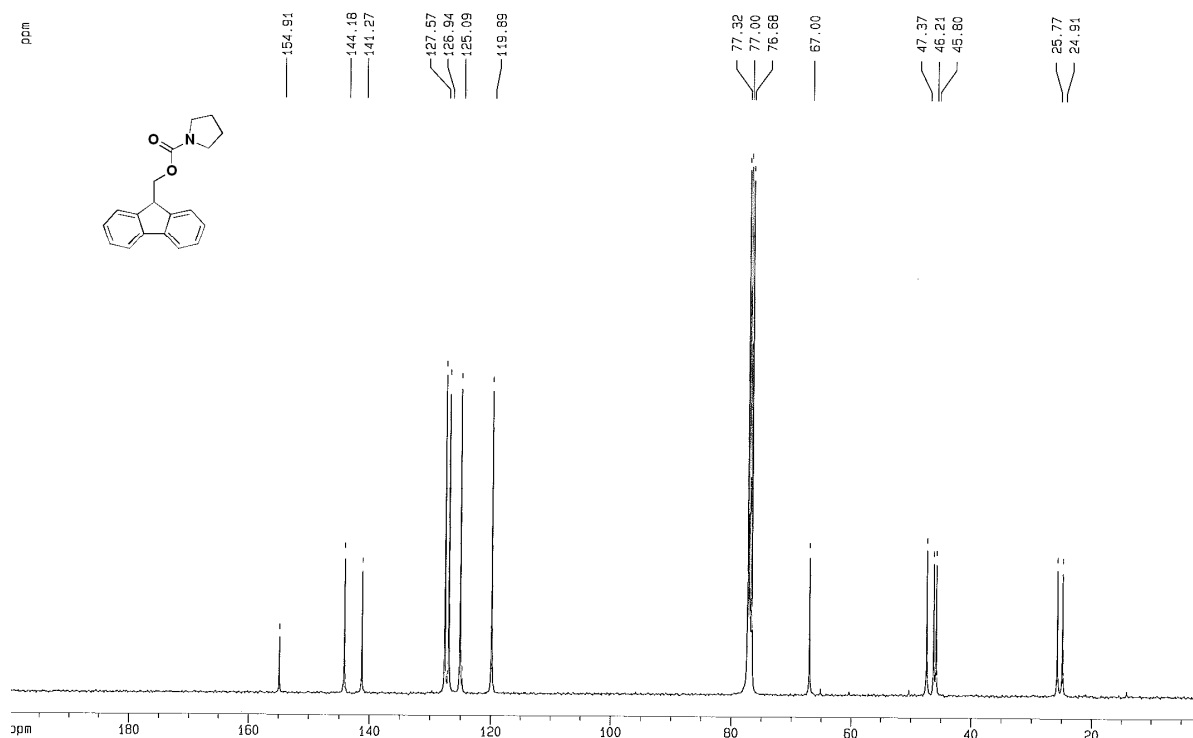

Carbon NMR spectra of *N*-(9-Fluorenylmethoxycarbonyl)pyrrolidine (**3k**).

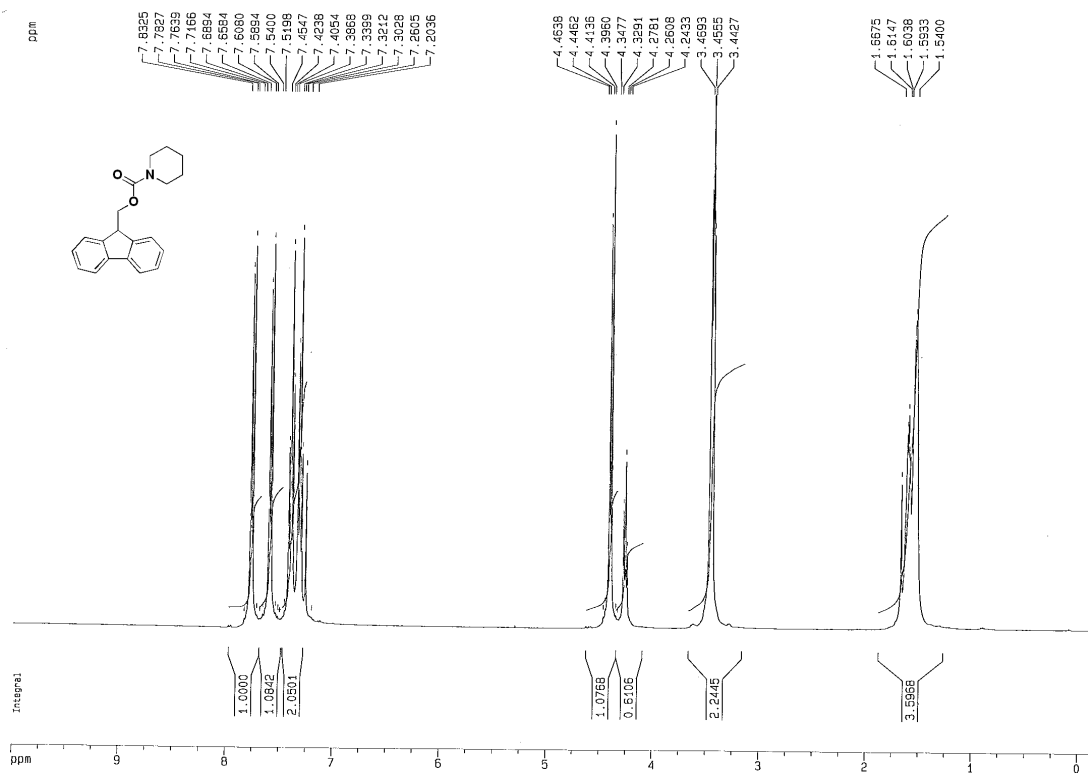

Proton NMR spectra of *N*-(9-fluorenylmethoxycarbonyl)piperidine (31).

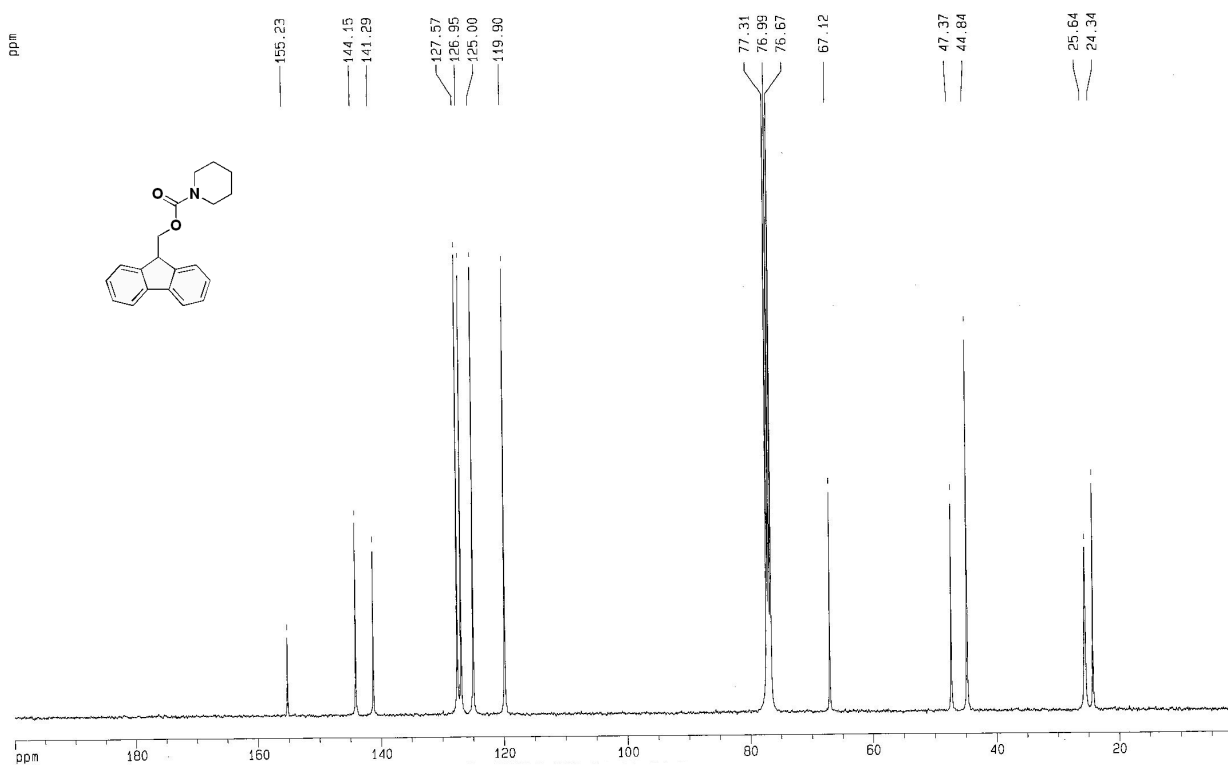

Carbon NMR spectra of *N*-(9-fluorenylmethoxycarbonyl)piperidine (31).



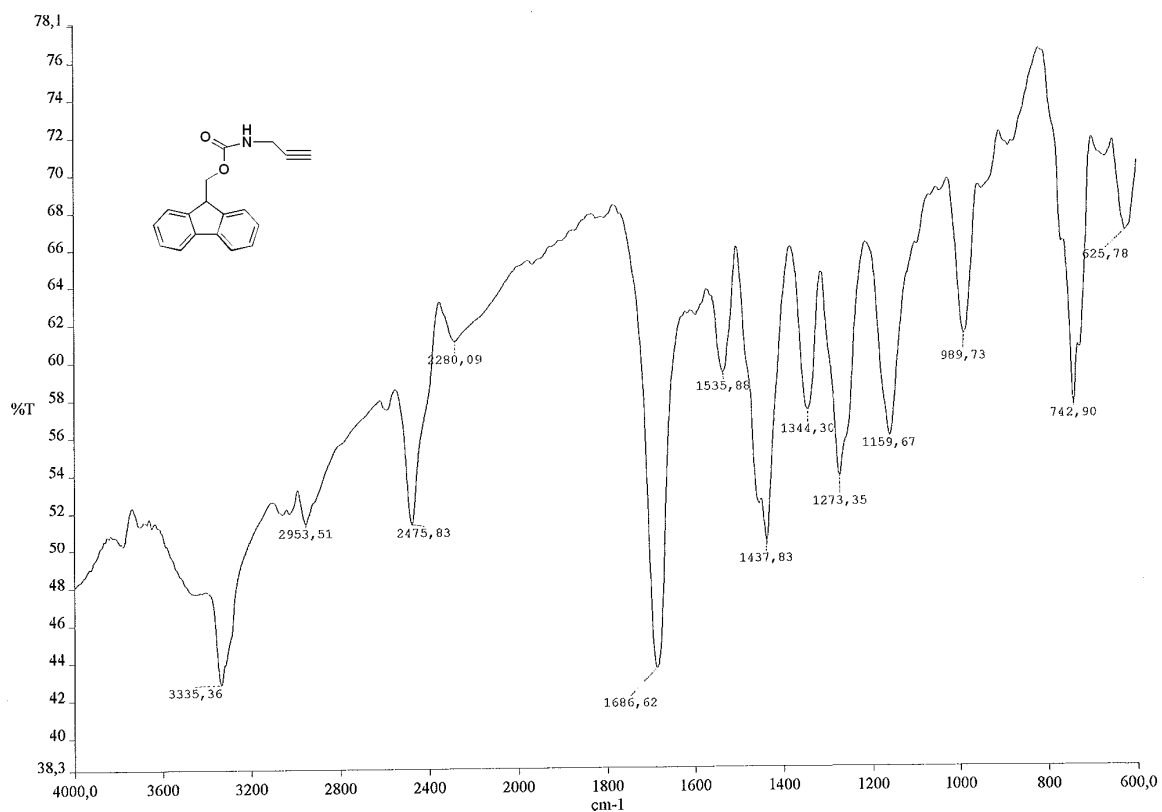

Infrared spectra of *N*-(9-Fluorenylmethoxycarbonyl)-prop-2-yn-1-amine (**3m**).

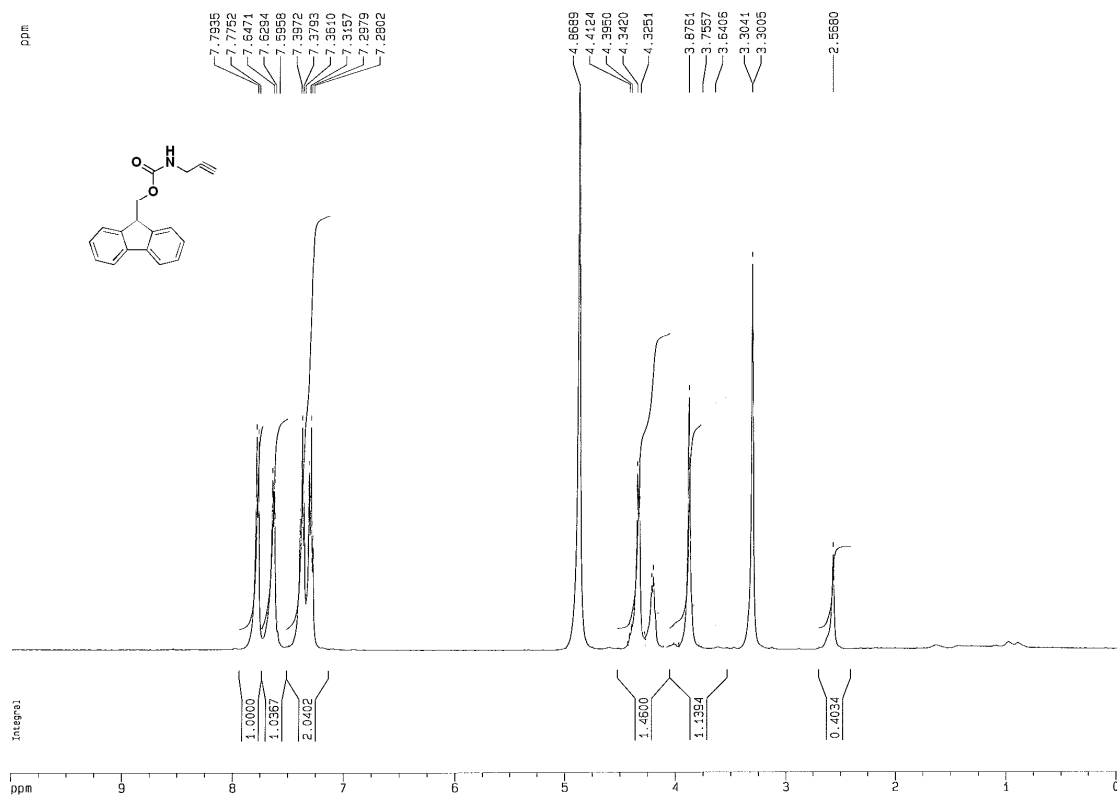

Proton NMR spectra of *N*-(9-fluorenylmethoxycarbonyl)-prop-2-yn-1-amine (**3m**).

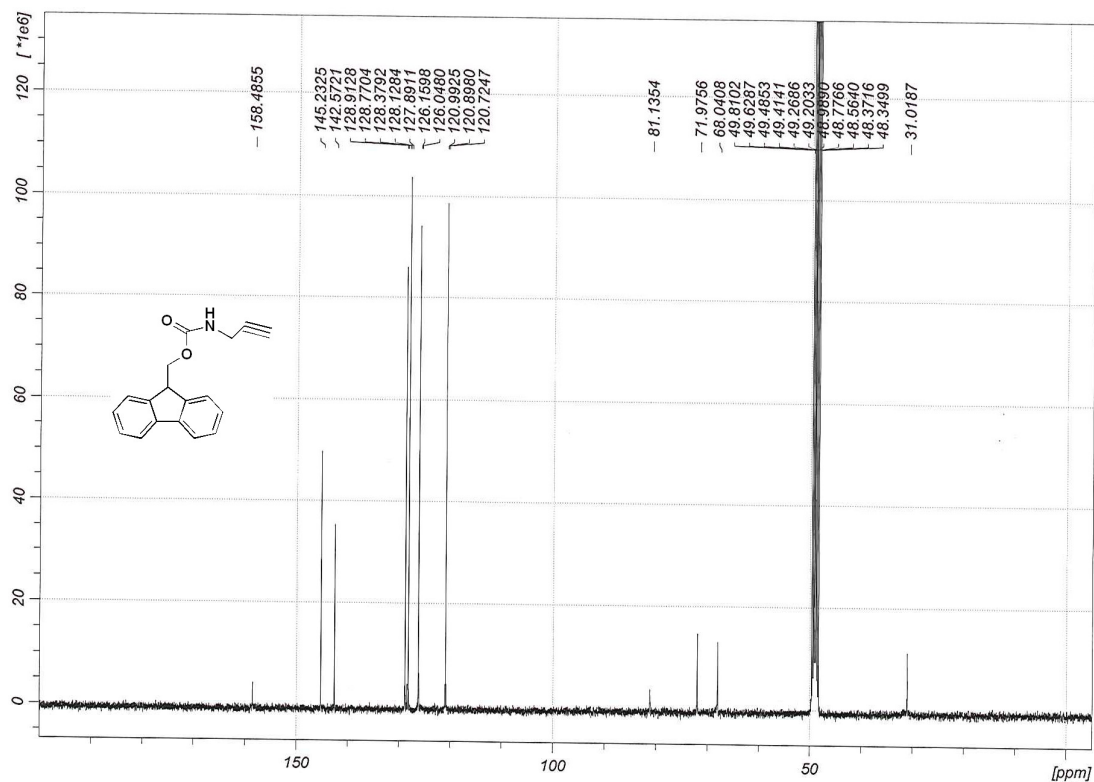

Carbon NMR spectra of *N*-(9-fluorenylmethoxycarbonyl)-prop-2-yn-1-amine (**3m**).

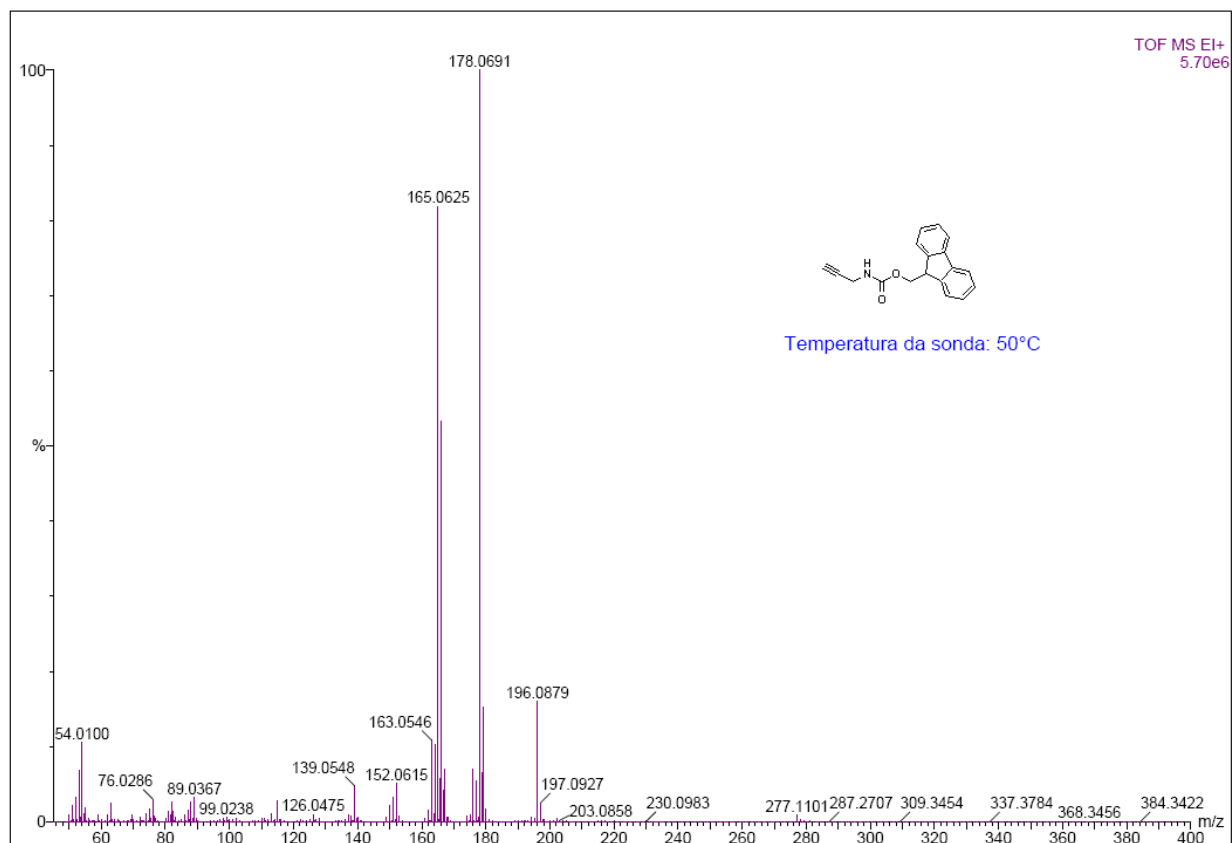

### Electron impact mass spectra of *N*-(9-fluorenylmethoxycarbonyl)-prop-2-yn-1-amine (**3m**).

Monoisotopic Mass, Odd and Even Electron Ions  
 114 formula(e) evaluated with 2 results within limits (up to 50 closest results for each mass)  
 Elements Used:  
 12C: 16-18 13C: 0-2 H: 16-16 N: 1-1 O: 2-2

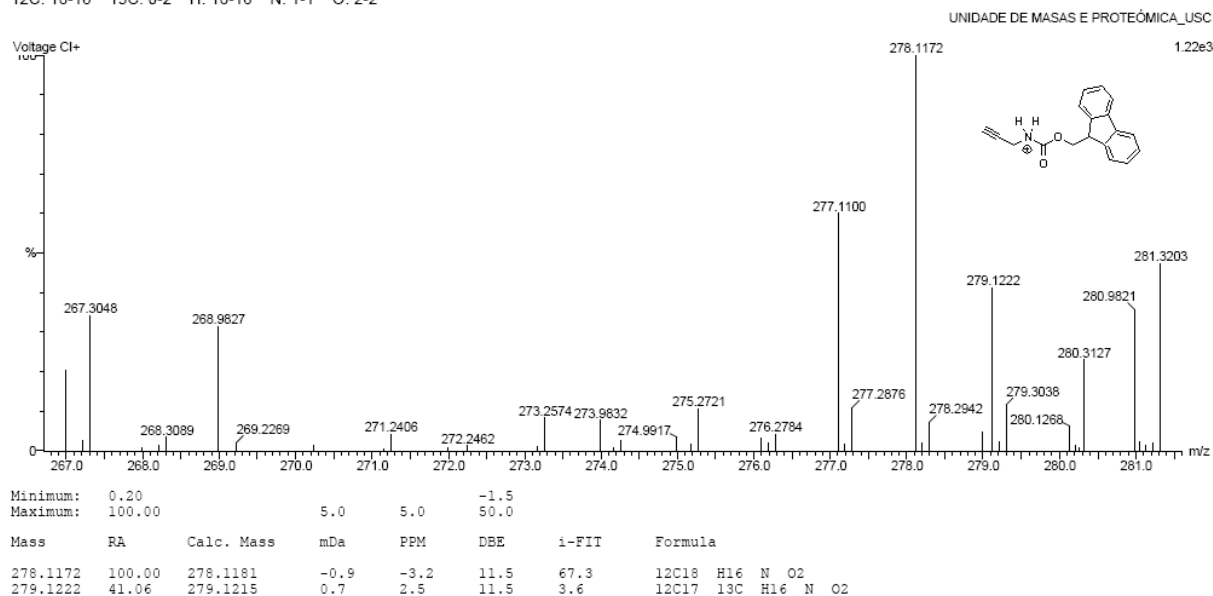

### High resolution chemical ionization spectra of *N*-(9-fluorenylmethoxycarbonyl)-prop-2-yn-1-amine (**3m**).

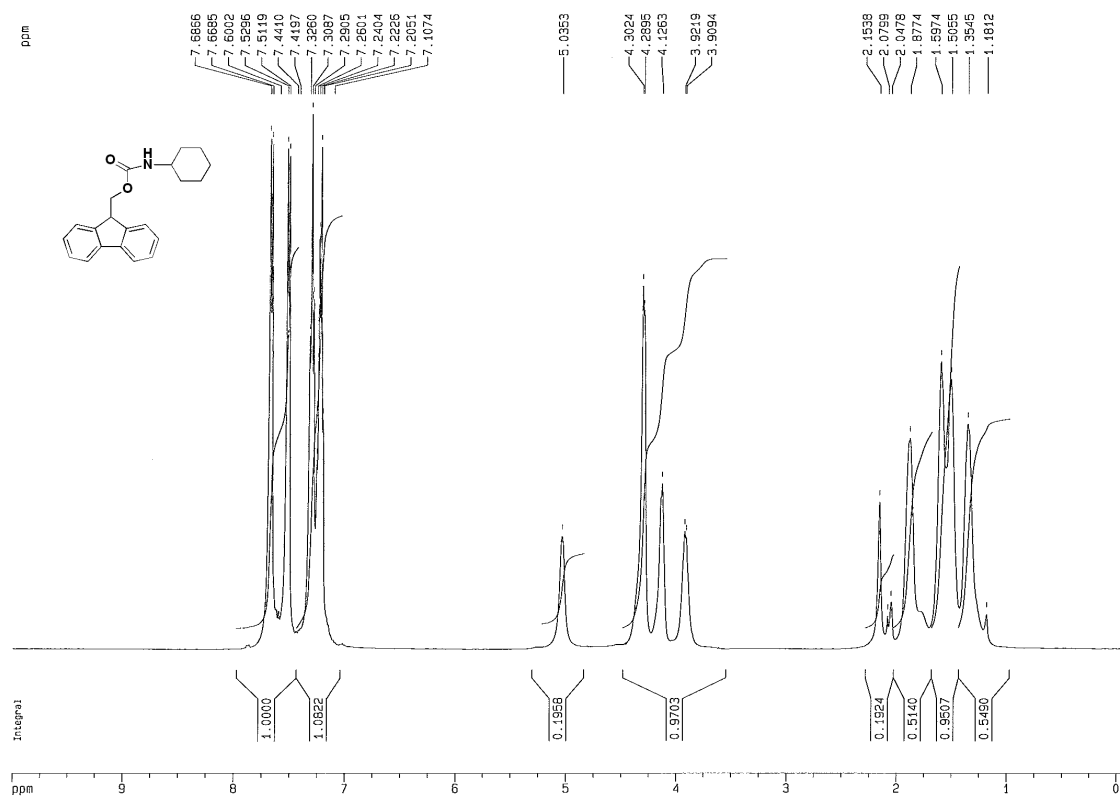

Proton NMR spectra of *N*-(9-Fluorenylmethoxycarbonyl)cyclohexylamine (**3n**).

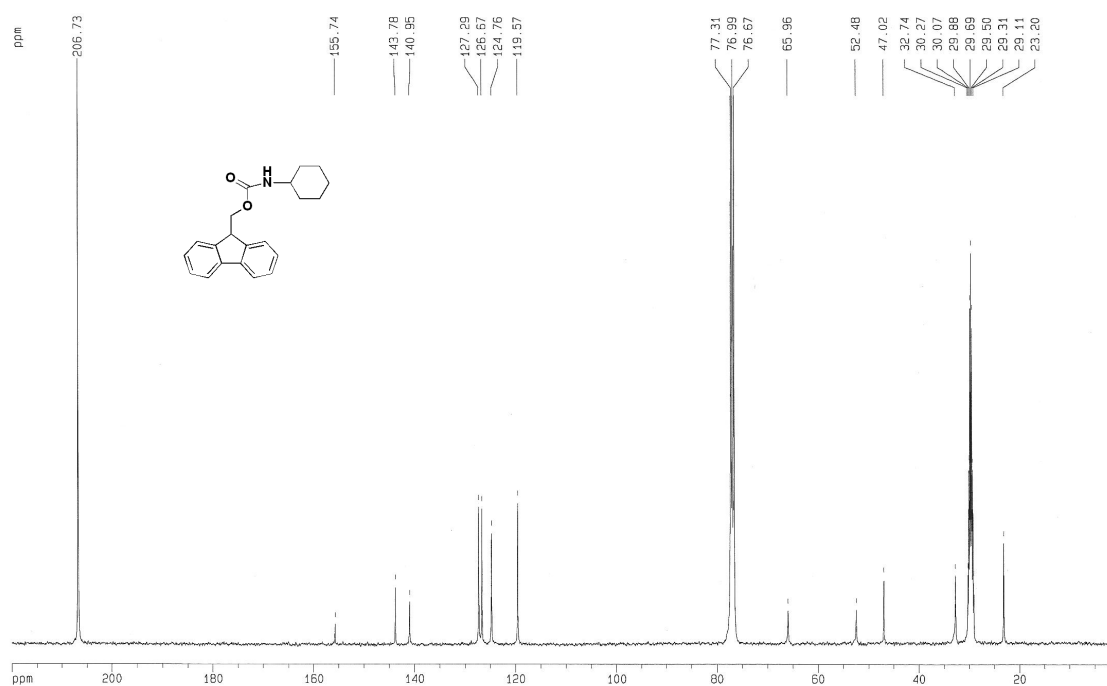

Carbon NMR spectra of *N*-(9-Fluorenylmethoxycarbonyl)cyclohexylamine (**3n**).

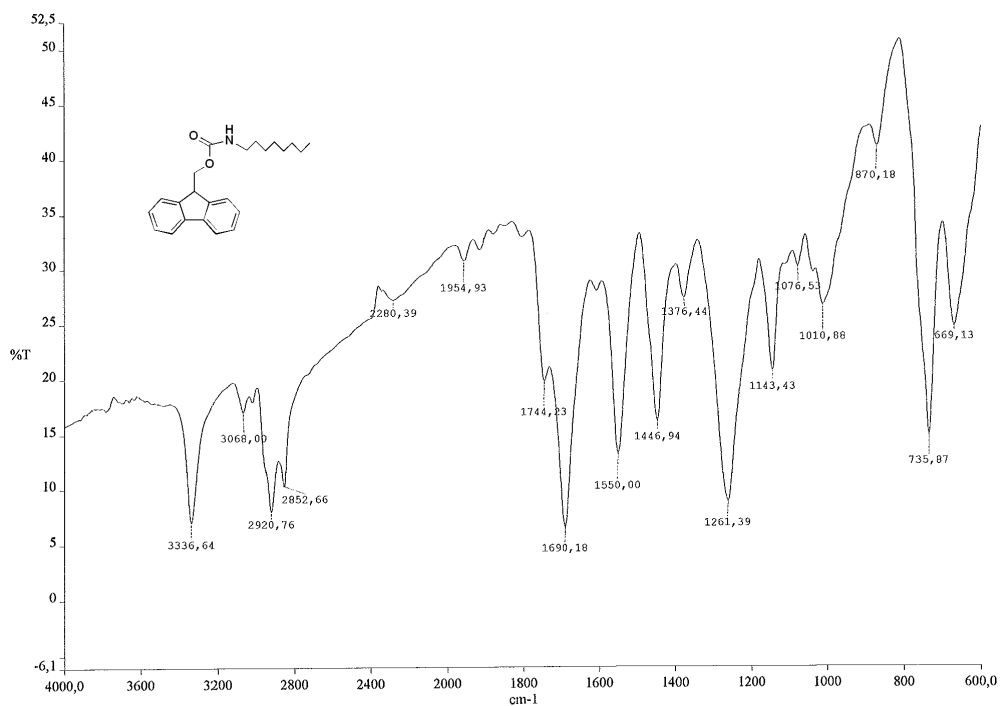

Infrared spectra of spectra of *N*-(9-fluorenylmethoxycarbonyl)octylamine (**30**).

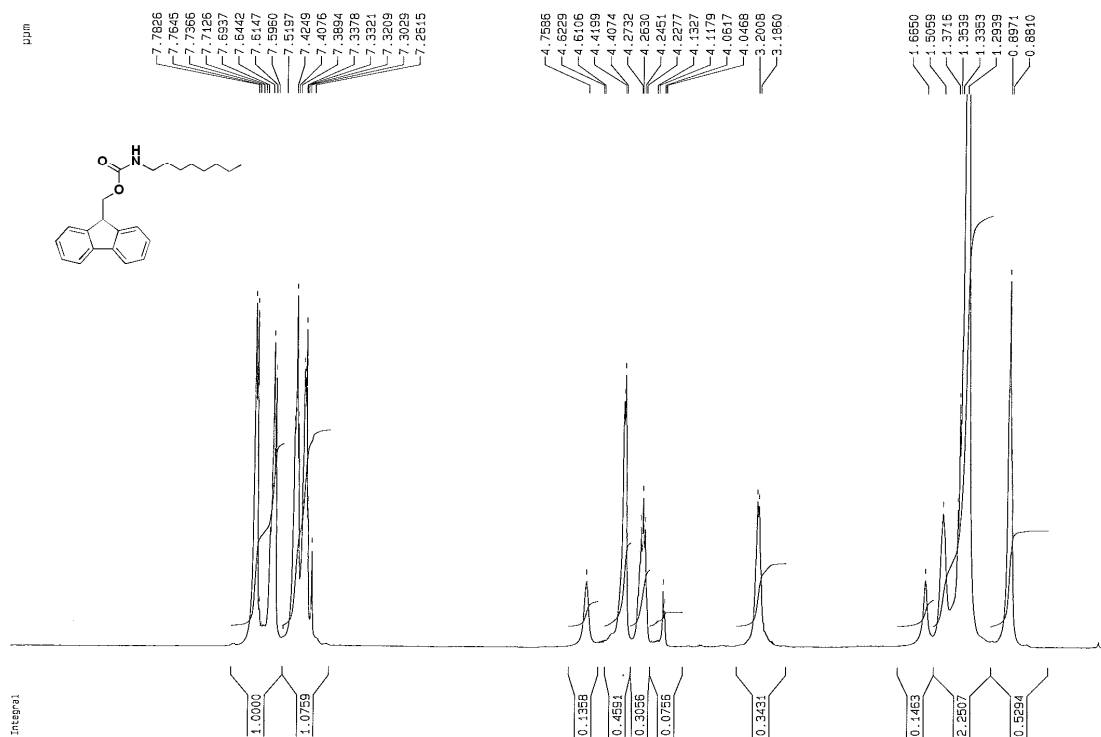

Proton NMR spectra of *N*-(9-fluorenylmethoxycarbonyl)octylamine (30).

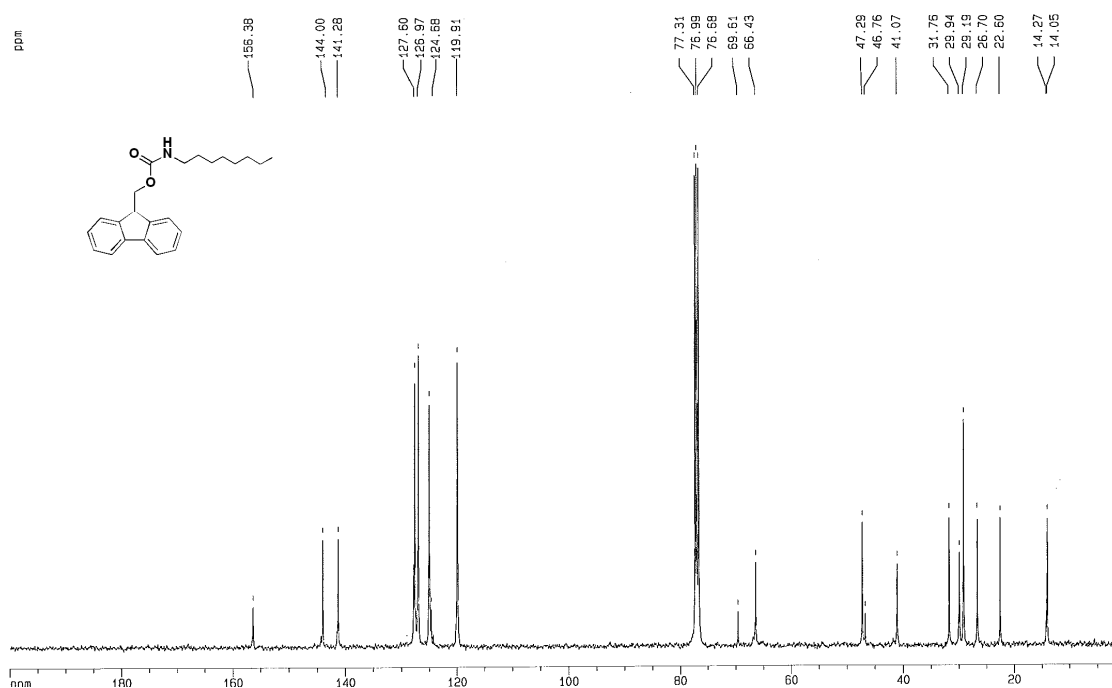

Carbon NMR spectra of *N*-(9-fluorenylmethoxycarbonyl)octylamine (30).

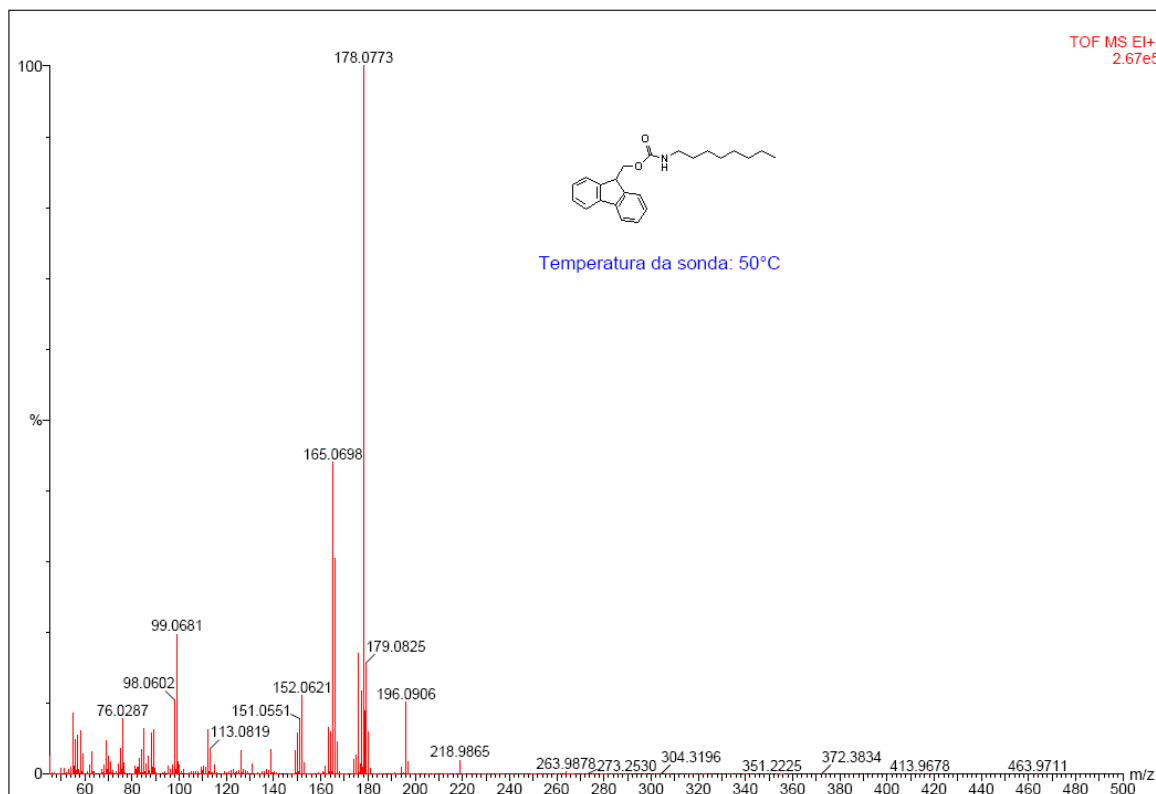

Electron impact mass spectra of *N*-(9-fluorenylmethoxycarbonyl)octylamine (**30**).

Monoisotopic Mass, Odd and Even Electron Ions  
 22 formula(e) evaluated with 3 results within limits (up to 50 closest results for each mass)  
 Elements Used:  
 12C: 21-23 13C: 0-2 H: 30-30 N: 1-1 O: 2-2

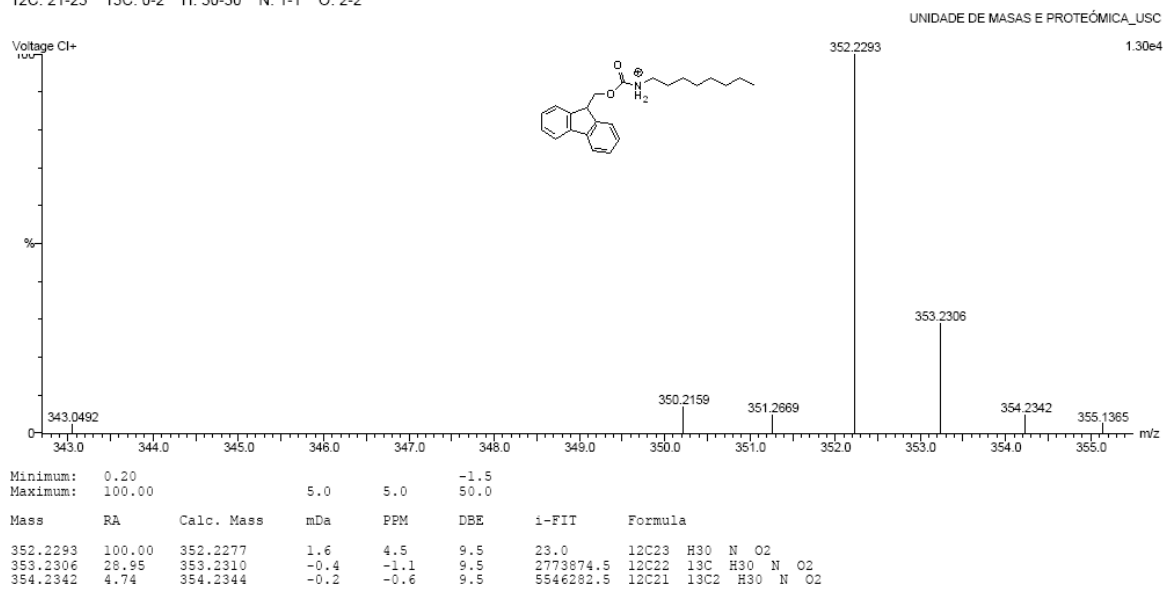

High resolution chemical ionization mass spectra of *N*-(9-fluorenylmethoxycarbonyl)octylamine (**30**).

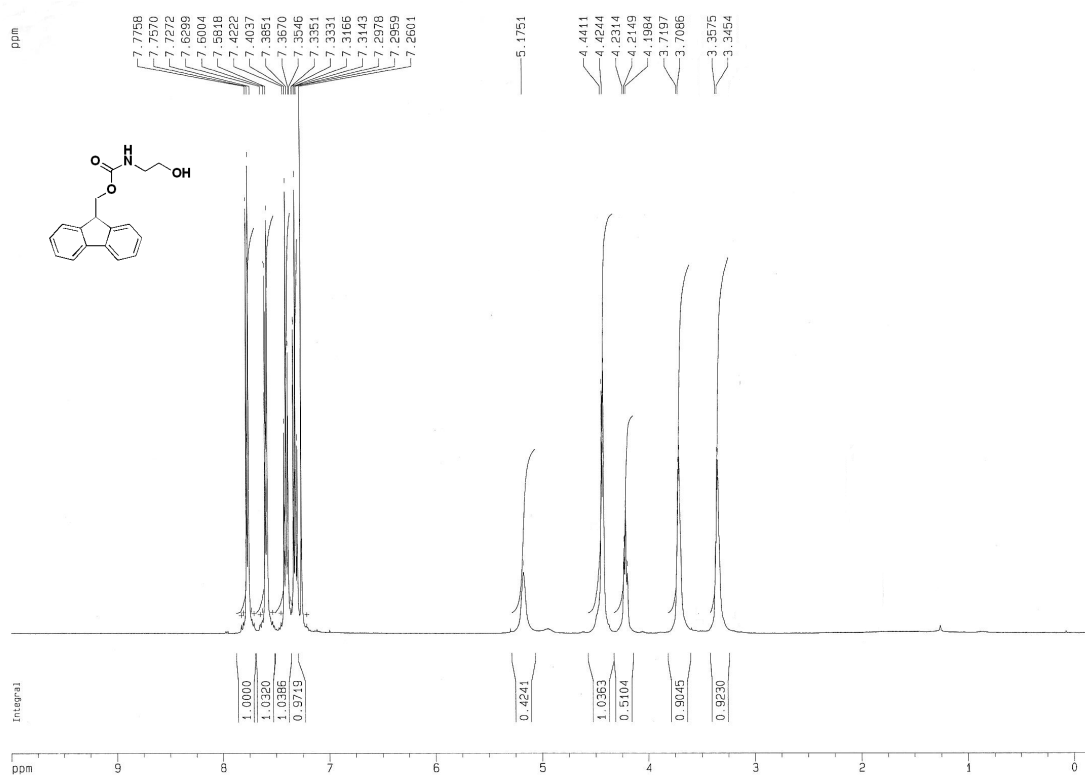

Proton NMR spectra of *N*-(9-fluorenylmethoxycarbonyl)ethanolamine (**3p**).

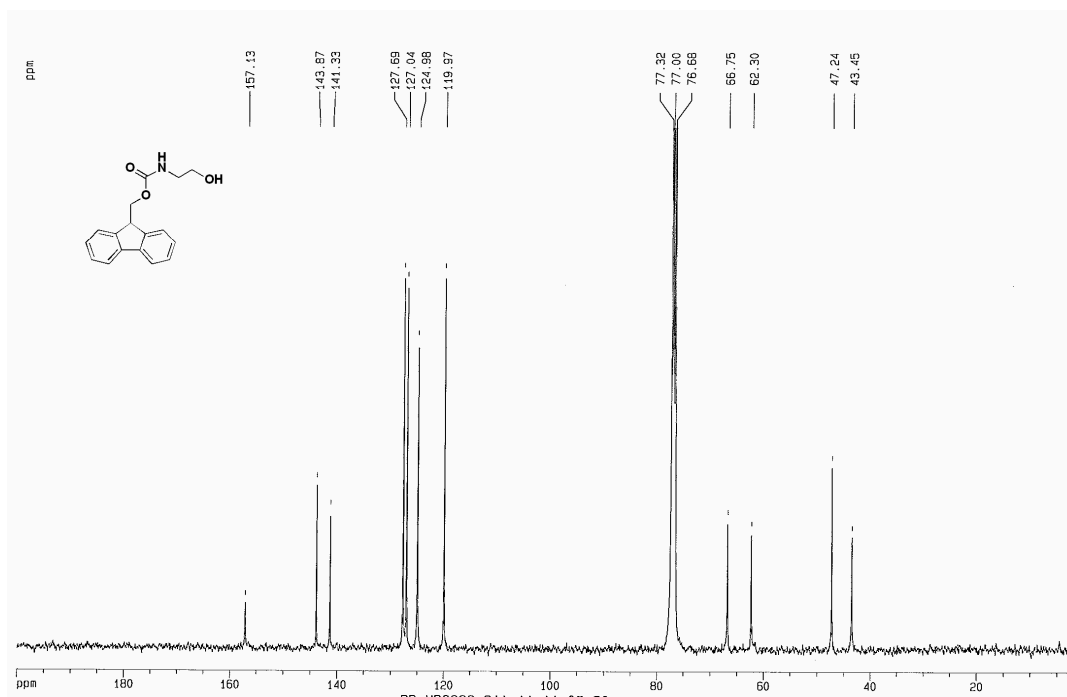

Carbon NMR spectra of *N*-(9-fluorenylmethoxycarbonyl)ethanolamine (**3p**).



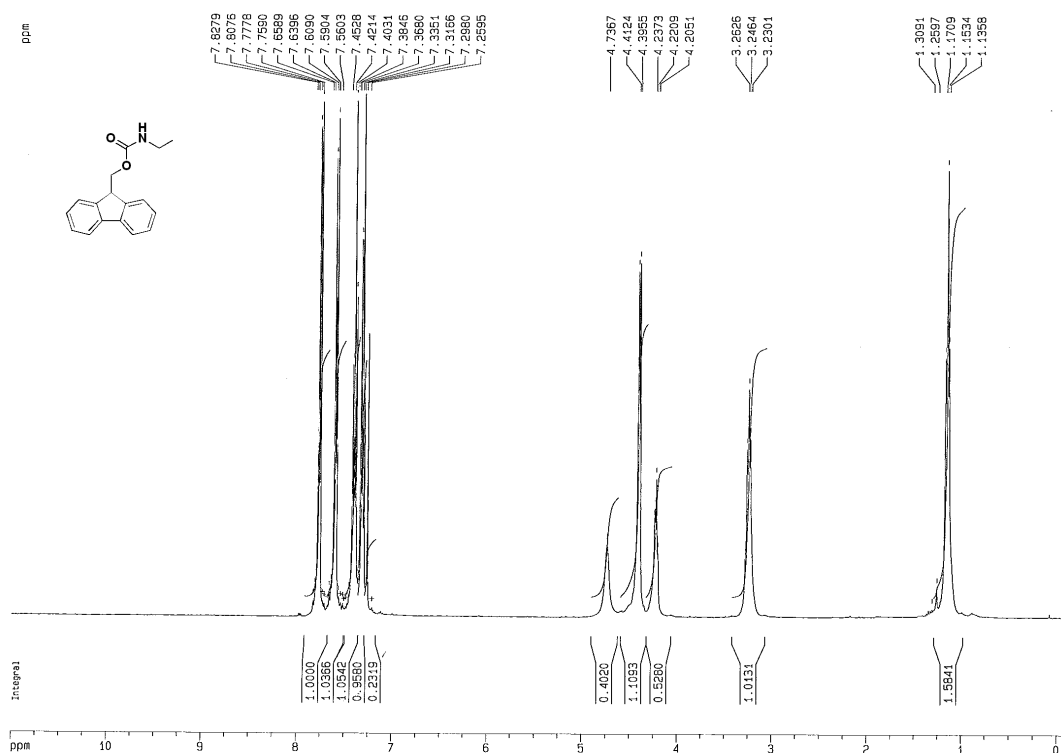

Proton NMR spectra of *N*-(9-fluorenylmethoxycarbonyl)ethylamine (**3q**).

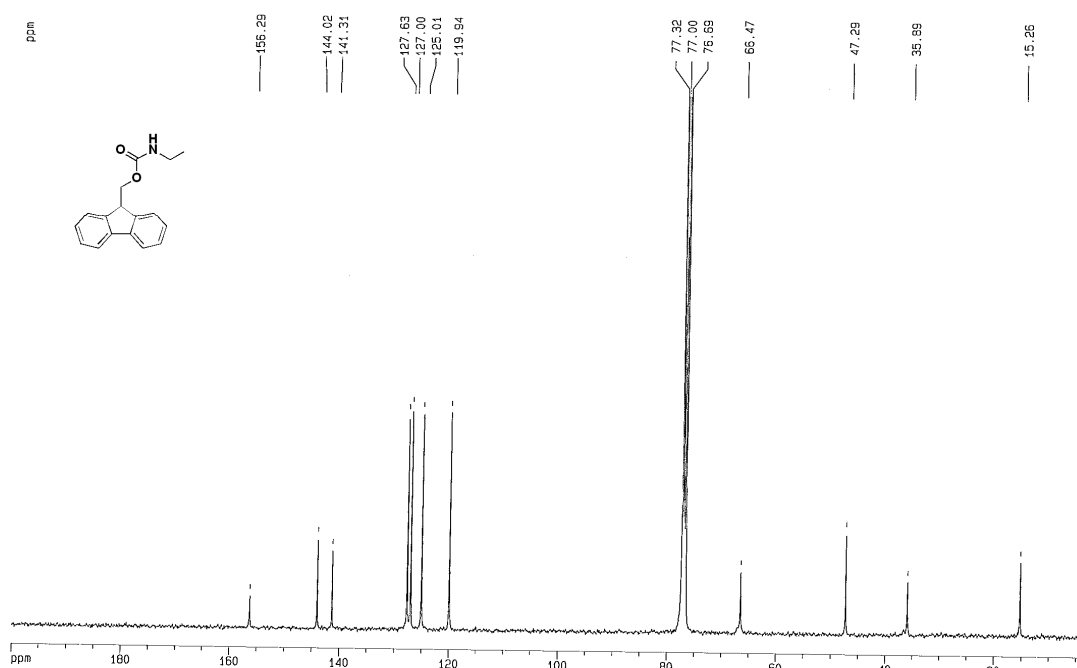

Carbon NMR spectra of *N*-(9-fluorenylmethoxycarbonyl)ethylamine (**3q**).

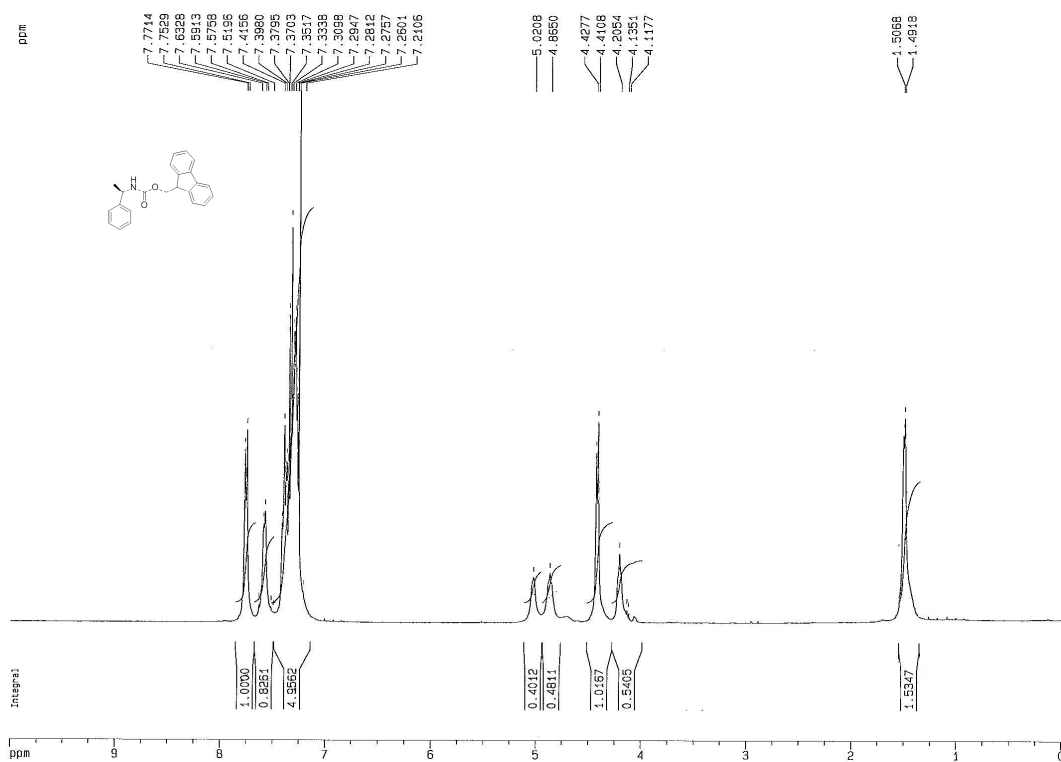

Proton NMR spectra of (R)-N-(9-fluorenylmethoxycarbonyl)-1-phenylethylamine (**3r**).

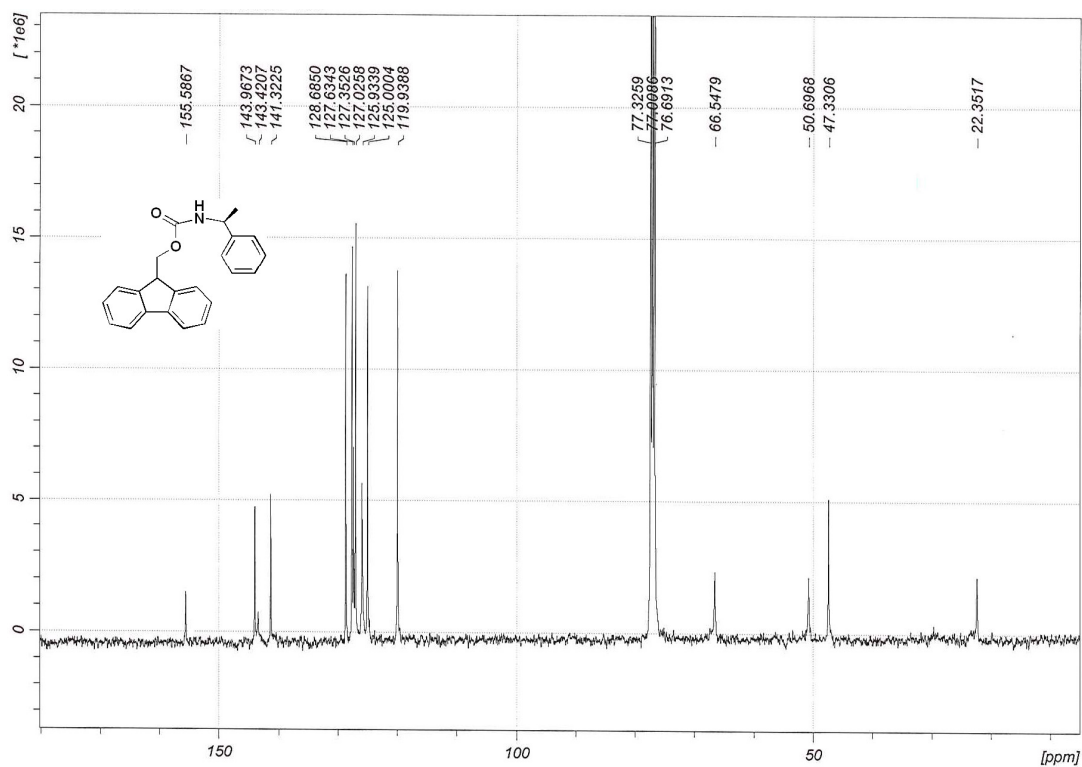

Carbon NMR spectra of (R)-N-(9-fluorenylmethoxycarbonyl)-1-phenylethylamine (**3r**).

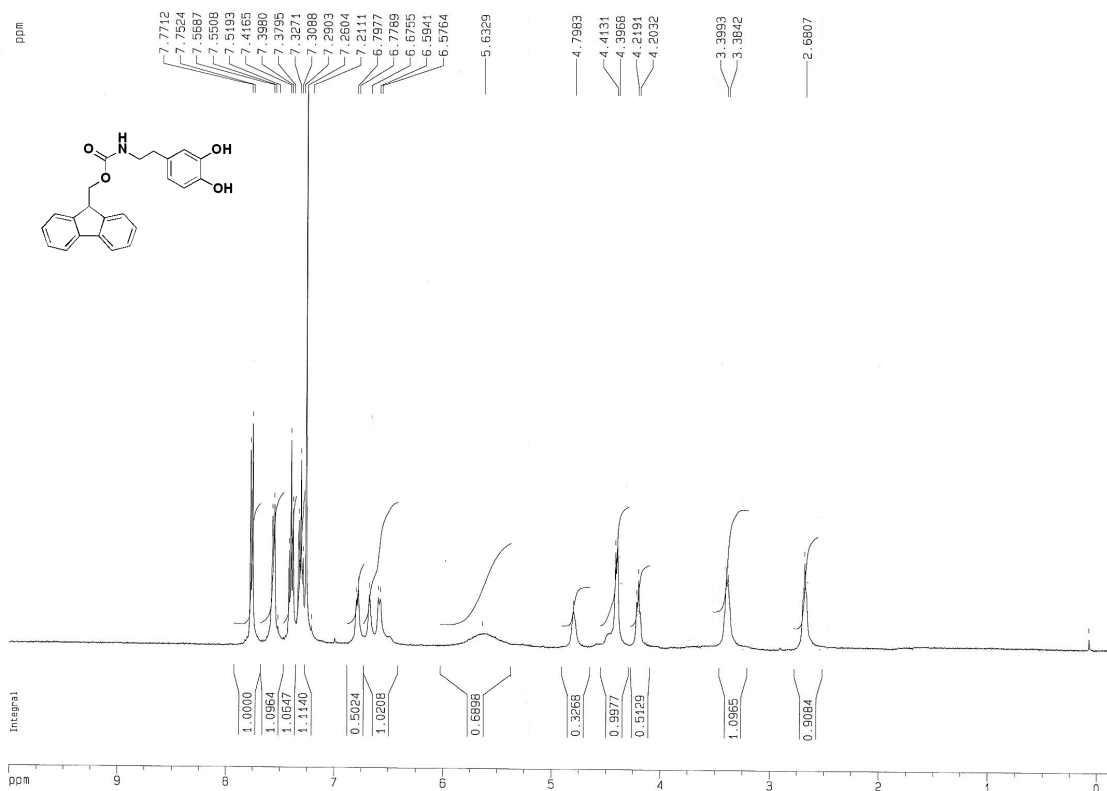

Proton NMR spectra of *N*-(9-fluorenylmethoxycarbonyl)dopamine (3s).

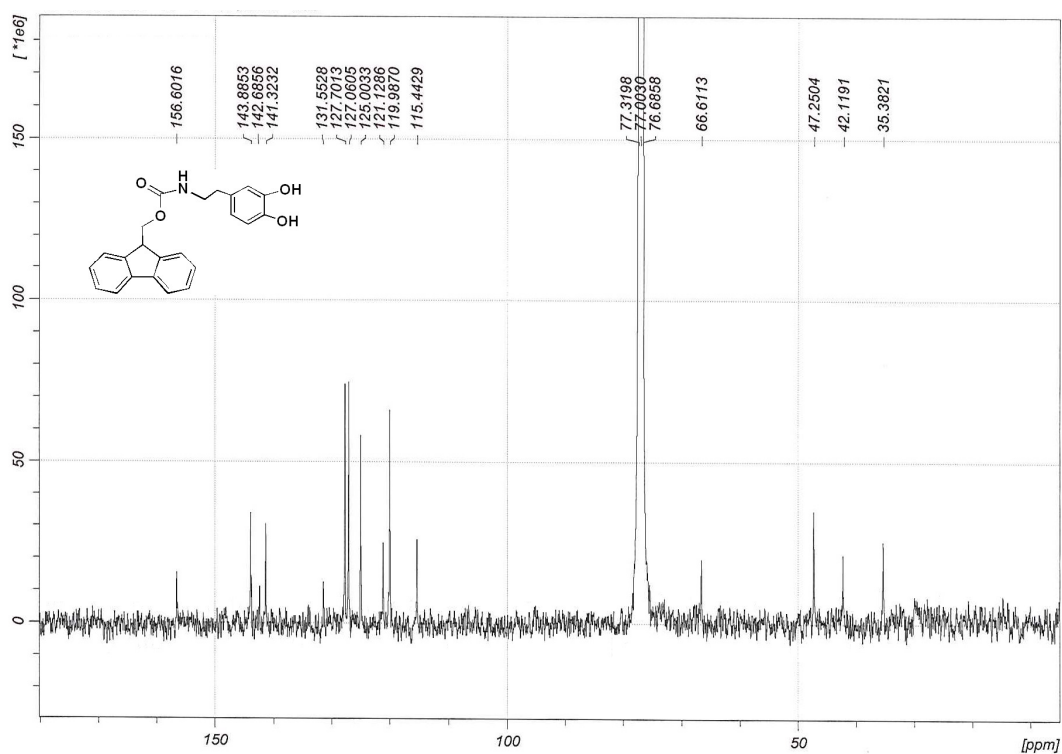

Carbon NMR spectra of *N*-(9-fluorenylmethoxycarbonyl)dopamine (3s).

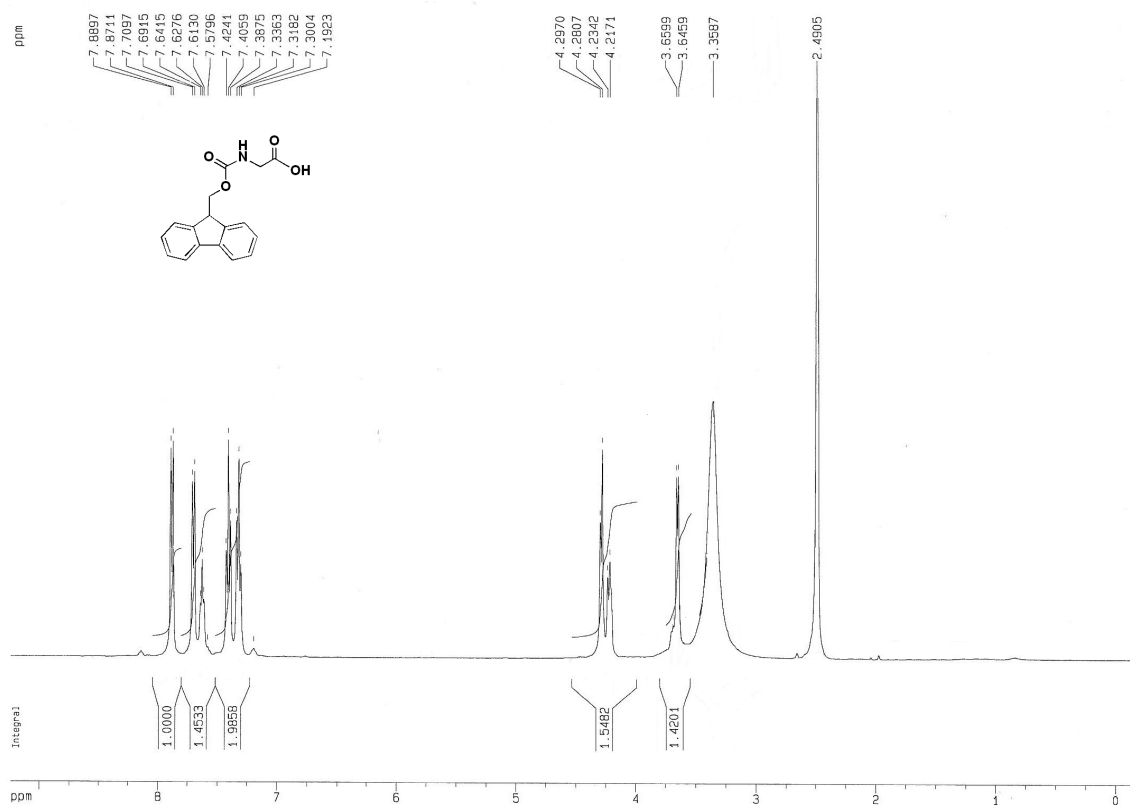

Proton NMR spectra of *N*-(9-Fluorenylmethoxycarbonyl)glycine (**3t**).

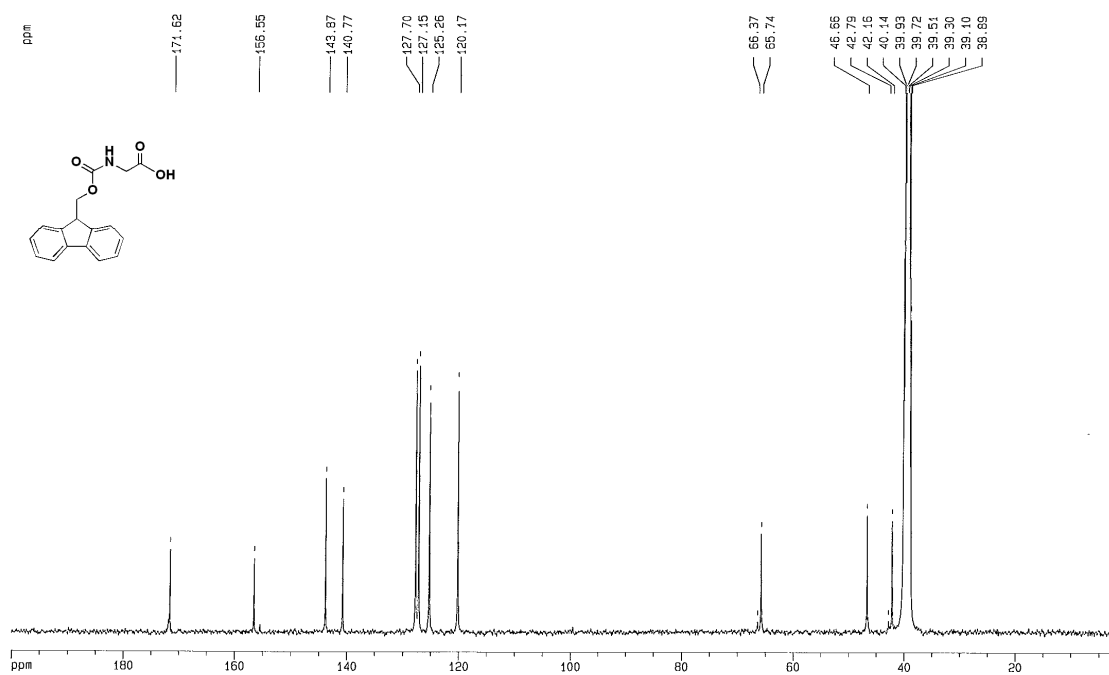

Carbon NMR spectra of *N*-(9-Fluorenylmethoxycarbonyl)glycine (**3t**).

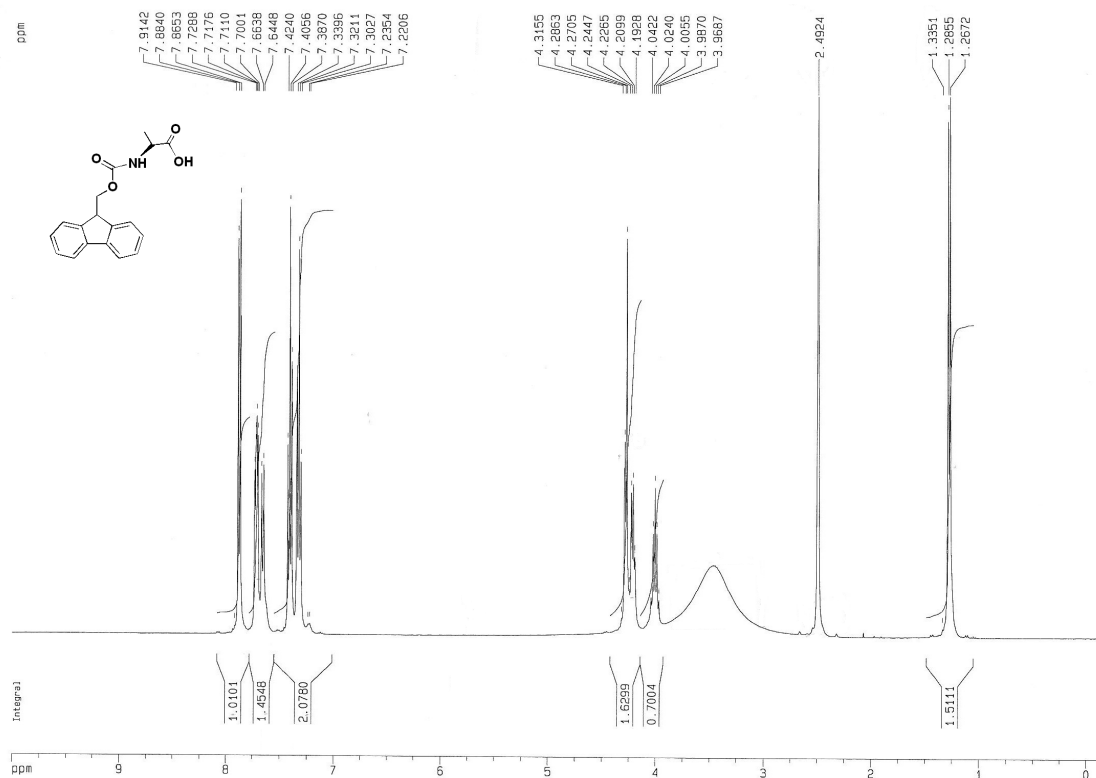

Proton NMR spectra of *N*-(9-fluorenylmethoxycarbonyl)alanine (**3u**).

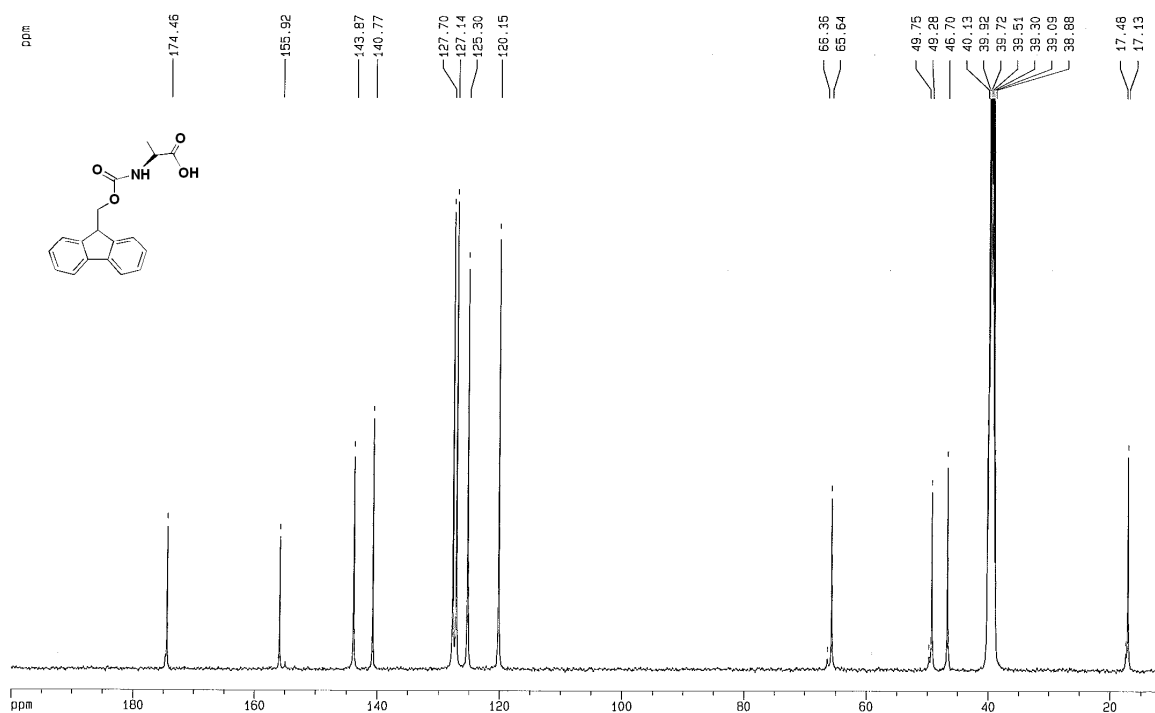

Carbon NMR spectra of *N*-(9-fluorenylmethoxycarbonyl)alanine (**3u**).

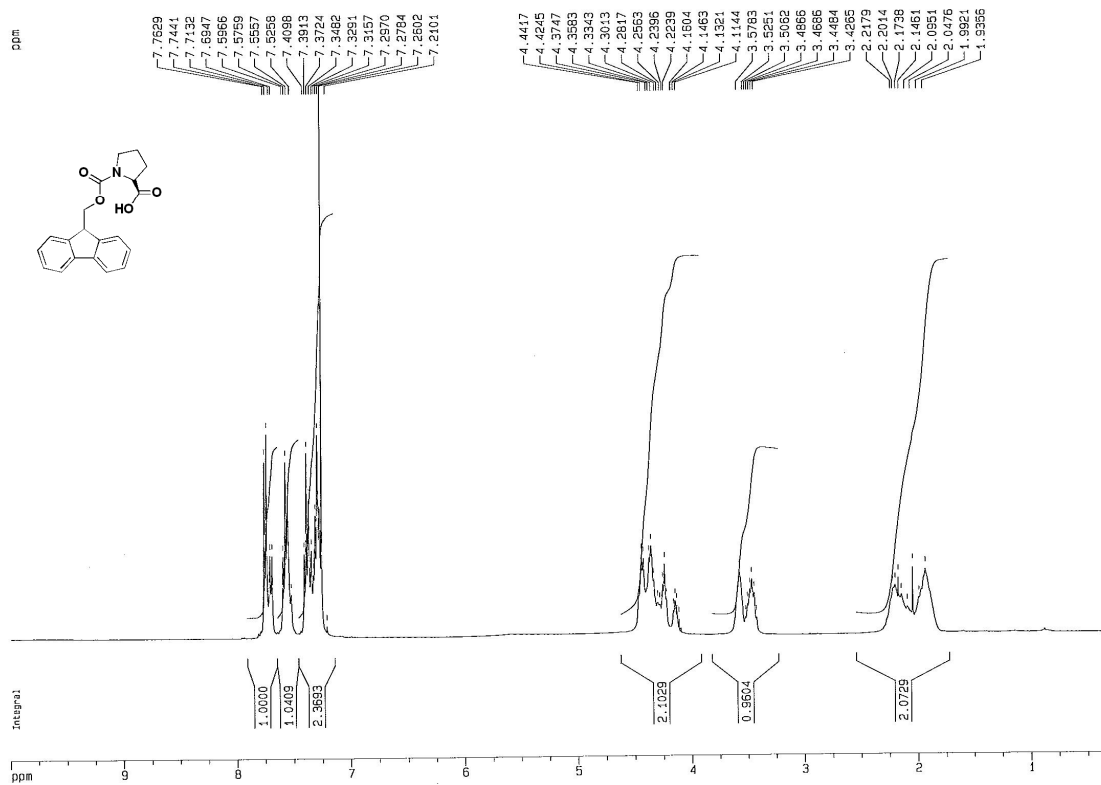

Proton NMR spectra of *N*-(9-fluorenylmethoxycarbonyl)proline (**3v**).

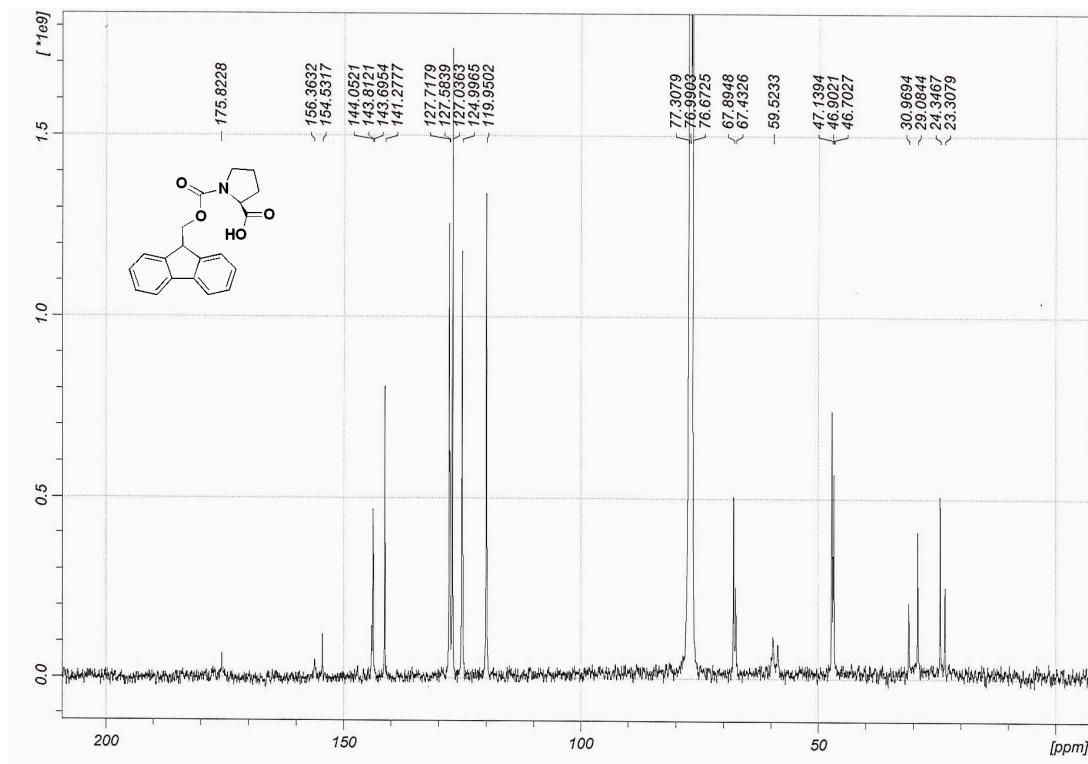

Carbon NMR spectra of *N*-(9-fluorenylmethoxycarbonyl)proline (**3v**).

### HPLC analysis of *N*-Fmoc $\alpha$ -amino acids

The HPLC - SHIMADZU(Japan), LC-20 AT pump.

UV-dectector (SPD-M20A).

Chiralpak-IA (250mm X 4 mm).

Mobile phase consisted of 10 % Isopropyl alcohol : 90 % hexane containing 0.1 % TFA, flow rate 1 mL/ min.

### Chromatograms for determination of the enantiomeric purity of

### *N*-(9-Fluorenylmethoxycarbonyl)alanine (3u)

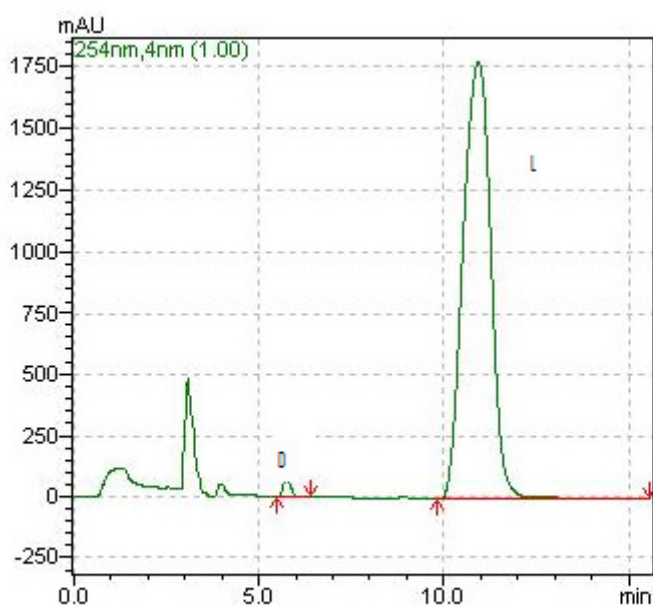

| No. | RT   | Area     | % Ratio    | D or L |
|-----|------|----------|------------|--------|
| 1   | 5.7  | 1065762  | 1.01 = 1   | D      |
| 2   | 10.9 | 93498980 | 98.87 = 99 | L      |

### Chromatograms for determination of the enantiomeric purity of

### N-(9-Fluorenylmethoxycarbonyl)proline (3v)

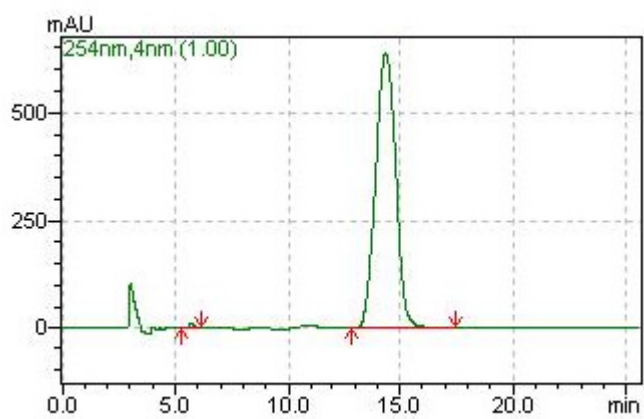

| No. | RT   | Area     | % Ratio | D or L |
|-----|------|----------|---------|--------|
| 1   | 5.9  | 195628   | 0.5     | D      |
| 2   | 14.3 | 39836285 | 99.5    | L      |
